# Supplementary material for: Macrophages and Adipocytes in Human Obesity: Adipose Tissue Gene Expression and Insulin Sensitivity During Calorie Restriction and Weight Stabilization
Source: PubMed Central journal article supplement — Diabetes. 2009 Apr 28;58(7):1558–67. doi: 10.2337/db09-0033 (PMC2699855; doi:10.2337/db09-0033), 2009-04-28
Supplement: supp_db09-0033_Tables.pdf [file supp_db09-0033_Tables.pdf]

**Supplementary Table 1:** List of differentially expressed genes during Energy Restriction, Weight Stabilization and Dietary Intervention.

| Gene Symbol                    | Gene Name                                                                                      | SAM score | Fold Change |
|--------------------------------|------------------------------------------------------------------------------------------------|-----------|-------------|
| <i>Energy Restriction (ER)</i> |                                                                                                |           |             |
| <i>Down regulated genes</i>    |                                                                                                |           |             |
| ELOVL5                         | Elovl Family Member 5, Elongation Of Long Chain Fatty Acids (Fen1/Elo2, Sur4/Elo3-Like, Yeast) | -5.74     | 0.70        |
| DGAT2                          | Diacylglycerol O-Acyltransferase Homolog 2 (Mouse)                                             | -5.41     | 0.62        |
| FMOD                           | Fibromodulin                                                                                   | -5.39     | 0.61        |
| ALDOC                          | Aldolase C, Fructose-Bisphosphate                                                              | -5.33     | 0.59        |
| DGAT2                          | Diacylglycerol O-Acyltransferase Homolog 2 (Mouse)                                             | -5.22     | 0.59        |
| LGALS12                        | Lectin, Galactoside-Binding, Soluble, 12 (Galectin 12)                                         | -5.17     | 0.69        |
| NMB                            | Neuromedin B                                                                                   | -5.04     | 0.68        |
| FADS2                          | Fatty Acid Desaturase 2                                                                        | -4.80     | 0.44        |
| THBS4                          | Thrombospondin 4                                                                               | -4.69     | 0.55        |
| AACS                           | Acetoacetyl-Coa Synthetase                                                                     | -4.53     | 0.69        |
| HP                             | Haptoglobin                                                                                    | -4.52     | 0.37        |
| PTPLB                          | Protein Tyrosine Phosphatase-Like (Proline Instead Of Catalytic Arginine), Member B            | -4.48     | 0.72        |
| LOX                            | Lysyl Oxidase                                                                                  | -4.43     | 0.78        |
| MXRA5                          | Matrix-Remodelling Associated 5                                                                | -4.43     | 0.63        |
| DHCR24                         | 24-Dehydrocholesterol Reductase                                                                | -4.38     | 0.74        |
| LOX                            | Lysyl Oxidase                                                                                  | -4.26     | 0.78        |
| ACSL1                          | Fatty-Acid-Coenzyme A Ligase, Long-Chain 1                                                     | -4.23     | 0.71        |
| MME                            | Membrane Metallo-Endopeptidase (Neutral Endopeptidase, Enkephalinase, Calla, Cd10)             | -4.20     | 0.71        |
| GLYAT                          | Glycine-N-Acyltransferase                                                                      | -4.13     | 0.79        |
| MYCBP                          | C-Myc Binding Protein                                                                          | -4.11     | 0.78        |
| LOC55908                       | Hepatocellular Carcinoma-Associated Gene Td26                                                  | -4.09     | 0.51        |
| SREBF1                         | Sterol Regulatory Element Binding Transcription Factor 1                                       | -4.05     | 0.66        |
| CKMT2                          | Creatine Kinase, Mitochondrial 2 (Sarcomeric)                                                  | -4.04     | 0.74        |
| SCD                            | Stearoyl-Coa Desaturase (Delta-9-Desaturase)                                                   | -4.04     | 0.42        |
| AQP1                           | Aquaporin 1 (Colton Blood Group)                                                               | -3.96     | 0.73        |
| COMP                           | Cartilage Oligomeric Matrix Protein                                                            | -3.93     | 0.61        |
| PRDX2                          | Peroxiredoxin 2                                                                                | -3.92     | 0.77        |
| PPAP2A                         | Phosphatidic Acid Phosphatase Type 2a                                                          | -3.91     | 0.80        |
| ECHDC1                         | Enoyl Coenzyme A Hydratase Domain Containing 1                                                 | -3.87     | 0.68        |
| ATP2B4                         | Atpase, Ca <sup>++</sup> Transporting, Plasma Membrane 4                                       | -3.80     | 0.85        |
| CES1                           | Carboxylesterase 1 (Monocyte/Macrophage Serine Esterase 1)                                     | -3.67     | 0.70        |
| A_24_P272713                   | -                                                                                              | -3.64     | 0.75        |
| HIST1H1C                       | Histone 1, H1c                                                                                 | -3.61     | 0.74        |
| LOX                            | Lysyl Oxidase                                                                                  | -3.59     | 0.80        |
| CXCL9                          | Chemokine (C-X-C Motif) Ligand 9                                                               | -3.56     | 0.82        |
| SCD                            | Stearoyl-Coa Desaturase (Delta-9-Desaturase)                                                   | -3.56     | 0.45        |

|              |                                                                 |       |      |
|--------------|-----------------------------------------------------------------|-------|------|
| MGC4399      | Pnc1 Protein                                                    | -3.55 | 0.78 |
| GLYAT        | Glycine-N-Acyltransferase                                       | -3.55 | 0.76 |
| MGC4172      | Short-Chain Dehydrogenase/Reductase                             | -3.54 | 0.81 |
| LOX          | Lysyl Oxidase                                                   | -3.53 | 0.80 |
| C19orf32     | -                                                               | -3.51 | 0.76 |
| LOC389393    | -                                                               | -3.51 | 0.77 |
| LDHD         | Lactate Dehydrogenase D                                         | -3.50 | 0.81 |
| IDH1         | Isocitrate Dehydrogenase 1 (Nadp+), Soluble                     | -3.48 | 0.78 |
| CDO1         | Cysteine Dioxygenase, Type I                                    | -3.48 | 0.76 |
| PRDX2        | Peroxiredoxin 2                                                 | -3.48 | 0.81 |
| A_24_P609932 | -                                                               | -3.47 | 0.84 |
| LOC152831    | -                                                               | -3.47 | 0.72 |
| LOC152831    | -                                                               | -3.46 | 0.72 |
| C22orf16     | Chromosome 22 Open Reading Frame 16                             | -3.44 | 0.76 |
| LOX          | Lysyl Oxidase                                                   | -3.43 | 0.79 |
| GCSH         | Glycine Cleavage System Protein H (Aminomethyl Carrier)         | -3.43 | 0.79 |
| IDH2         | Isocitrate Dehydrogenase 2 (Nadp+), Mitochondrial               | -3.42 | 0.80 |
| ACAS2        | Acyl-CoA synthetase short-chain family member 2                 | -3.41 | 0.81 |
| CICE         | Cell Death-Inducing Cide-Like Effector Pseudogene               | -3.41 | 0.78 |
| BZRP         | Benzodiazapine Receptor (Peripheral)                            | -3.39 | 0.75 |
| MGC35097     | -                                                               | -3.37 | 0.76 |
| NDUFB3       | Nadh Dehydrogenase (Ubiquinone) 1 Beta Subcomplex, 3, 12kda     | -3.35 | 0.81 |
| SELENBP1     | Selenium Binding Protein 1                                      | -3.35 | 0.78 |
| TF           | Transferrin                                                     | -3.34 | 0.78 |
| THC2304000   | -                                                               | -3.34 | 0.82 |
| AGT          | Angiotensinogen (Serpin Peptidase Inhibitor, Clade A, Member 8) | -3.34 | 0.79 |
| ME1          | Malic Enzyme 1, Nadp(+)-Dependent, Cytosolic                    | -3.34 | 0.79 |
| PGM1         | Phosphoglucomutase 1                                            | -3.33 | 0.80 |
| LOX          | Lysyl Oxidase                                                   | -3.33 | 0.81 |
| BENE         | Mal, T-cell differentiation protein-like                        | -3.33 | 0.82 |
| LOX          | Lysyl Oxidase                                                   | -3.33 | 0.80 |
| AMOT         | Angiomotin                                                      | -3.31 | 0.79 |
| A_32_P127454 | -                                                               | -3.31 | 0.81 |
| C20orf7      | Chromosome 20 Open Reading Frame 7                              | -3.30 | 0.73 |
| PDHA1        | Pyruvate Dehydrogenase (Lipoamide) Alpha 1                      | -3.28 | 0.79 |
| DECR1        | 2,4-Dienoyl Coa Reductase 1, Mitochondrial                      | -3.27 | 0.82 |
| AQP1         | Aquaporin 1 (Colton Blood Group)                                | -3.27 | 0.76 |
| CDKN2C       | Cyclin-Dependent Kinase Inhibitor 2c (P18, Inhibits Cdk4)       | -3.27 | 0.77 |
| THC2373940   | -                                                               | -3.26 | 0.74 |
| DOCK6        | Dedicator Of Cytokinesis 6                                      | -3.24 | 0.79 |
| GYS1         | Glycogen Synthase 1 (Muscle)                                    | -3.21 | 0.79 |
| A_24_P608790 | -                                                               | -3.20 | 0.80 |
| CSTA         | Cystatin A (Stefin A)                                           | -3.18 | 0.77 |

|                 |                                                                              |       |      |
|-----------------|------------------------------------------------------------------------------|-------|------|
| GAPDH           | Glyceraldehyde-3-Phosphate Dehydrogenase                                     | -3.17 | 0.81 |
| LAIR1           | Leukocyte-Associated Ig-Like Receptor 1                                      | -3.16 | 0.81 |
| MRPL19          | Mitochondrial Ribosomal Protein L19                                          | -3.15 | 0.84 |
| UQCRH           | Ubiquinol-Cytochrome C Reductase Hinge Protein                               | -3.14 | 0.81 |
| THC2271174      | -                                                                            | -3.14 | 0.82 |
| ENST00000333415 | -                                                                            | -3.13 | 0.79 |
| ENST00000326308 | -                                                                            | -3.12 | 0.84 |
| ZAP128          | Acyl-CoA thioesterase 2                                                      | -3.12 | 0.83 |
| LOX             | Lysyl Oxidase                                                                | -3.10 | 0.80 |
| LOC388305       | -                                                                            | -3.10 | 0.80 |
| DDT             | D-Dopachrome Tautomerase                                                     | -3.08 | 0.83 |
| CCND1           | Cyclin D1                                                                    | -3.08 | 0.79 |
| TMEM14B         | Transmembrane Protein 14b                                                    | -3.06 | 0.83 |
| PCDH12          | Protocadherin 12                                                             | -3.04 | 0.85 |
| MTCH2           | Mitochondrial Carrier Homolog 2 (C. Elegans)                                 | -3.04 | 0.78 |
| S100B           | S100 Calcium Binding Protein, Beta (Neural)                                  | -3.03 | 0.74 |
| A_23_P170713    | -                                                                            | -3.03 | 0.80 |
| ICAM3           | Intercellular Adhesion Molecule 3                                            | -3.03 | 0.81 |
| CDH13           | Cadherin 13, H-Cadherin (Heart)                                              | -3.03 | 0.76 |
| LOC152831       | -                                                                            | -3.02 | 0.77 |
| UQCRH           | Ubiquinol-Cytochrome C Reductase Hinge Protein                               | -3.02 | 0.80 |
| FAM14B          | Family With Sequence Similarity 14, Member B                                 | -3.02 | 0.85 |
| MMP15           | Matrix Metalloproteinase 15 (Membrane-Inserted)                              | -3.02 | 0.80 |
| LOC92162        | -                                                                            | -3.02 | 0.76 |
| LOXL2           | Lysyl Oxidase-Like 2                                                         | -3.01 | 0.81 |
| MECR            | Mitochondrial Trans-2-Enoyl-Coa Reductase                                    | -3.01 | 0.77 |
| CR609146        | -                                                                            | -3.00 | 0.78 |
| ADRBK2          | Adrenergic, Beta, Receptor Kinase 2                                          | -3.00 | 0.79 |
| PC4             | Activated RNA polymerase II transcription cofactor 4                         | -2.99 | 0.83 |
| RNF141          | Ring Finger Protein 141                                                      | -2.98 | 0.81 |
| PPIL1           | Peptidylprolyl Isomerase (Cyclophilin)-Like 1                                | -2.98 | 0.82 |
| LAMB3           | Laminin, Beta 3                                                              | -2.98 | 0.73 |
| C14orf147       | Chromosome 14 Open Reading Frame 147                                         | -2.97 | 0.87 |
| ATP5B           | Atp Synthase, H+ Transporting, Mitochondrial F1 Complex,<br>Beta Polypeptide | -2.97 | 0.85 |
| AK092810        | -                                                                            | -2.94 | 0.82 |
| LOX             | Lysyl Oxidase                                                                | -2.92 | 0.80 |
| SAA4            | Serum Amyloid A4, Constitutive                                               | -2.92 | 0.72 |
| ABCC6           | Atp-Binding Cassette, Sub-Family C (Cfr/Mrp), Member 6                       | -2.91 | 0.73 |
| POP5            | Processing Of Precursor 5, Ribonuclease P/Mrp Subunit (S.<br>Cerevisiae)     | -2.91 | 0.84 |
| ALDH9A1         | Aldehyde Dehydrogenase 9 Family, Member A1                                   | -2.87 | 0.79 |
| RetSat          | All-Trans-13,14-Dihydroretinol Saturase                                      | -2.87 | 0.80 |
| ENST00000314088 | -                                                                            | -2.86 | 0.80 |
| A_24_P32735     | -                                                                            | -2.85 | 0.84 |

|              |                                                                                   |       |      |
|--------------|-----------------------------------------------------------------------------------|-------|------|
| RDH5         | Retinol Dehydrogenase 5 (11-Cis And 9-Cis)                                        | -2.85 | 0.81 |
| ANKRD38      | Ankyrin Repeat Domain 38                                                          | -2.84 | 0.78 |
| SLC16A7      | Solute Carrier Family 16 (Monocarboxylic Acid Transporters), Member 7             | -2.84 | 0.83 |
| PLA2G4A      | Phospholipase A2, Group Iva (Cytosolic, Calcium-Dependent)                        | -2.83 | 0.76 |
| NDUFS1       | Nadh Dehydrogenase (Ubiquinone) Fe-S Protein 1, 75kda (Nadh-Coenzyme Q Reductase) | -2.83 | 0.86 |
| ACO2         | Aconitase 2, Mitochondrial                                                        | -2.82 | 0.85 |
| PHGDH        | Phosphoglycerate Dehydrogenase                                                    | -2.82 | 0.74 |
| HIBCH        | 3-Hydroxyisobutyryl-Coenzyme A Hydrolase                                          | -2.79 | 0.86 |
| LOXL2        | Lysyl Oxidase-Like 2                                                              | -2.79 | 0.83 |
| OXCT1        | 3-Oxoacid Coa Transferase 1                                                       | -2.79 | 0.82 |
| LOX          | Lysyl Oxidase                                                                     | -2.79 | 0.81 |
| MYEOV        | Myeloma Overexpressed Gene (In A Subset Of T(11;14) Positive Multiple Myelomas)   | -2.79 | 0.80 |
| FLJ22104     | -                                                                                 | -2.79 | 0.84 |
| THC2440787   | -                                                                                 | -2.78 | 0.86 |
| PC4          | SUB1 homolog ( <i>S. cerevisiae</i> )                                             | -2.78 | 0.82 |
| HIG1         | HIG1 domain family, member 1A                                                     | -2.78 | 0.83 |
| TRIM6        | Tripartite Motif-Containing 6                                                     | -2.77 | 0.86 |
| ACO2         | Aconitase 2, Mitochondrial                                                        | -2.77 | 0.84 |
| LAIR1        | Leukocyte-Associated Ig-Like Receptor 1                                           | -2.77 | 0.83 |
| A_24_P631993 | -                                                                                 | -2.76 | 0.84 |
| LOXL2        | Lysyl Oxidase-Like 2                                                              | -2.76 | 0.82 |
| ALAD         | Aminolevulinate, Delta-, Dehydratase                                              | -2.76 | 0.86 |
| ACAD9        | Acyl-Coenzyme A Dehydrogenase Family, Member 9                                    | -2.75 | 0.83 |
| TSMF         | Ts Translation Elongation Factor, Mitochondrial                                   | -2.74 | 0.87 |
| PDCD8        | Programmed Cell Death 8 (Apoptosis-Inducing Factor)                               | -2.74 | 0.85 |
| FAM36A       | Family With Sequence Similarity 36, Member A                                      | -2.74 | 0.86 |
| NDUFAB1      | Nadh Dehydrogenase (Ubiquinone) 1, Alpha/Beta Subcomplex, 1, 8kda                 | -2.74 | 0.85 |
| SAA4         | Serum Amyloid A4, Constitutive                                                    | -2.74 | 0.72 |
| GLRX2        | Glutaredoxin 2                                                                    | -2.74 | 0.82 |
| FH           | Fumarate Hydratase                                                                | -2.73 | 0.86 |
| ENC1         | Ectodermal-Neural Cortex (With Btb-Like Domain)                                   | -2.72 | 0.84 |
| SAA4         | Serum Amyloid A4, Constitutive                                                    | -2.72 | 0.74 |
| DECR1        | 2,4-Dienoyl Coa Reductase 1, Mitochondrial                                        | -2.72 | 0.82 |
| PD XK        | Pyridoxal (Pyridoxine, Vitamin B6) Kinase                                         | -2.72 | 0.77 |
| ECHS1        | Enoyl Coenzyme A Hydratase, Short Chain, 1, Mitochondrial                         | -2.71 | 0.82 |
| SAA4         | Serum Amyloid A4, Constitutive                                                    | -2.71 | 0.73 |
| A_32_P133926 | -                                                                                 | -2.70 | 0.75 |
| BOLA3        | Bola-Like 3 ( <i>E. Coli</i> )                                                    | -2.70 | 0.87 |
| NDUFB2       | Nadh Dehydrogenase (Ubiquinone) 1 Beta Subcomplex, 2, 8kda                        | -2.69 | 0.83 |
| GPSN2        | Glycoprotein, Synaptic 2                                                          | -2.69 | 0.85 |

|                 |                                                                                                      |       |      |
|-----------------|------------------------------------------------------------------------------------------------------|-------|------|
| ALDOAP2         | Aldolase A, Fructose-Bisphosphate Pseudogene 2                                                       | -2.69 | 0.82 |
| LOXL2           | Lysyl Oxidase-Like 2                                                                                 | -2.68 | 0.82 |
| LOXL2           | Lysyl Oxidase-Like 2                                                                                 | -2.67 | 0.82 |
| RASSF4          | Ras Association (Ralgs/Af-6) Domain Family 4                                                         | -2.67 | 0.83 |
| LOXL2           | Lysyl Oxidase-Like 2                                                                                 | -2.67 | 0.80 |
| SULT1A2         | Sulfotransferase Family, Cytosolic, 1a, Phenol-Preferring, Member 2                                  | -2.67 | 0.81 |
| C1orf122        | Chromosome 1 Open Reading Frame 122                                                                  | -2.67 | 0.86 |
| ENST00000321482 | -                                                                                                    | -2.67 | 0.86 |
| DECR2           | 2,4-Dienoyl Coa Reductase 2, Peroxisomal                                                             | -2.66 | 0.86 |
| AK098185        | -                                                                                                    | -2.65 | 0.88 |
| SFRP2           | Secreted Frizzled-Related Protein 2                                                                  | -2.65 | 0.66 |
| SURF4           | Surfeit 4                                                                                            | -2.64 | 0.86 |
| UCRC            | Ubiquinol-Cytochrome C Reductase Complex (7.2 Kd)                                                    | -2.63 | 0.86 |
| ZNF406          | Zinc Finger Protein 406                                                                              | -2.63 | 0.79 |
| C1orf102        | Chromosome 1 Open Reading Frame 102                                                                  | -2.63 | 0.85 |
| A_24_P324074    | -                                                                                                    | -2.63 | 0.87 |
| LOC148898       | Hypothetical Protein Bc007899                                                                        | -2.63 | 0.82 |
| TMEM14C         | Transmembrane Protein 14c                                                                            | -2.62 | 0.88 |
| ETFDH           | Electron-Transferring-Flavoprotein Dehydrogenase                                                     | -2.61 | 0.86 |
| ARL6IP5         | Adp-Ribosylation-Like Factor 6 Interacting Protein 5                                                 | -2.60 | 0.88 |
| A_23_P120644    | -                                                                                                    | -2.60 | 0.84 |
| CYBASC3         | Cytochrome B, Ascorbate Dependent 3                                                                  | -2.60 | 0.86 |
| THC2275899      | -                                                                                                    | -2.60 | 0.84 |
| TRIM6           | Tripartite Motif-Containing 6                                                                        | -2.59 | 0.85 |
| UQCRFS1         | Ubiquinol-Cytochrome C Reductase, Rieske Iron-Sulfur Polypeptide 1                                   | -2.59 | 0.87 |
| PC4             | SUB1 homolog ( <i>S. cerevisiae</i> )                                                                | -2.59 | 0.82 |
| IMPA3           | Inositol monophosphatase domain containing 1                                                         | -2.58 | 0.84 |
| FAM14B          | Family With Sequence Similarity 14, Member B                                                         | -2.58 | 0.87 |
| MRAS            | Muscle Ras Oncogene Homolog                                                                          | -2.58 | 0.87 |
| LOXL2           | Lysyl Oxidase-Like 2                                                                                 | -2.58 | 0.82 |
| FAM82C          | Family With Sequence Similarity 82, Member C                                                         | -2.57 | 0.84 |
| C20orf3         | Chromosome 20 Open Reading Frame 3                                                                   | -2.56 | 0.87 |
| ADPRHL1         | Adp-Ribosylhydrolase Like 1                                                                          | -2.56 | 0.86 |
| CYB5            | Cytochrome b5 type A (microsomal)                                                                    | -2.55 | 0.88 |
| ATP5A1          | Atp Synthase, H <sup>+</sup> Transporting, Mitochondrial F1 Complex, Alpha Subunit 1, Cardiac Muscle | -2.55 | 0.85 |
| THC2403797      | -                                                                                                    | -2.55 | 0.82 |
| TNC             | Tenascin C (Hexabrachion)                                                                            | -2.55 | 0.76 |
| MRPS15          | Mitochondrial Ribosomal Protein S15                                                                  | -2.55 | 0.87 |
| MGC35097        | -                                                                                                    | -2.55 | 0.82 |
| CCNL2           | Cyclin L2                                                                                            | -2.55 | 0.85 |
| MGC23909        | Hypothetical Protein Mgc23909                                                                        | -2.54 | 0.86 |
| LOXL2           | Lysyl Oxidase-Like 2                                                                                 | -2.54 | 0.83 |

|                 |                                                                                                                    |       |      |
|-----------------|--------------------------------------------------------------------------------------------------------------------|-------|------|
| COX7A1          | Cytochrome C Oxidase Subunit Vii Polypeptide 1 (Muscle)                                                            | -2.53 | 0.89 |
| A_24_P213034    | -                                                                                                                  | -2.53 | 0.86 |
| NQO2            | Nad(P)H Dehydrogenase, Quinone 2                                                                                   | -2.53 | 0.86 |
| LOXL2           | Lysyl Oxidase-Like 2                                                                                               | -2.53 | 0.82 |
| SHMT1           | Serine Hydroxymethyltransferase 1 (Soluble)                                                                        | -2.53 | 0.88 |
| CR591849        | -                                                                                                                  | -2.53 | 0.83 |
| DUSP14          | Dual Specificity Phosphatase 14                                                                                    | -2.53 | 0.84 |
| PPP1R1B         | Protein Phosphatase 1, Regulatory (Inhibitor) Subunit 1b<br>(Dopamine And Camp Regulated Phosphoprotein, Darpp-32) | -2.52 | 0.81 |
| THC2373712      | -                                                                                                                  | -2.52 | 0.80 |
| UQCRFS1         | Ubiquinol-Cytochrome C Reductase, Rieske Iron-Sulfur<br>Polypeptide 1                                              | -2.52 | 0.87 |
| CLU             | Clusterin                                                                                                          | -2.51 | 0.85 |
| LDHA            | Lactate Dehydrogenase A                                                                                            | -2.51 | 0.84 |
| CA421315        | -                                                                                                                  | -2.50 | 0.82 |
| SLC7A4          | Solute Carrier Family 7 (Cationic Amino Acid Transporter,<br>Y+ System), Member 4                                  | -2.49 | 0.81 |
| AK1             | Adenylate Kinase 1                                                                                                 | -2.48 | 0.84 |
| PTD015          | Ptd015 Protein                                                                                                     | -2.48 | 0.85 |
| BF373107        | -                                                                                                                  | -2.48 | 0.86 |
| A_24_P177634    | -                                                                                                                  | -2.47 | 0.87 |
| GAMT            | Guanidinoacetate N-Methyltransferase                                                                               | -2.47 | 0.87 |
| DPP3            | Dipeptidyl-Peptidase 3                                                                                             | -2.47 | 0.85 |
| C1orf122        | Chromosome 1 Open Reading Frame 122                                                                                | -2.47 | 0.86 |
| MGC23909        | Hypothetical Protein Mgc23909                                                                                      | -2.46 | 0.86 |
| TIMM8B          | Translocase Of Inner Mitochondrial Membrane 8 Homolog B<br>(Yeast)                                                 | -2.46 | 0.85 |
| QDPR            | Quinoid Dihydropteridine Reductase                                                                                 | -2.46 | 0.83 |
| PON2            | Paraoxonase 2                                                                                                      | -2.46 | 0.87 |
| INSIG1          | Insulin Induced Gene 1                                                                                             | -2.46 | 0.85 |
| QP-C            | Ubiquinol-cytochrome c reductase, complex III subunit<br>VII, 9.5kDa                                               | -2.46 | 0.86 |
| GHITM           | Growth Hormone Inducible Transmembrane Protein                                                                     | -2.45 | 0.85 |
| LOXL2           | Lysyl Oxidase-Like 2                                                                                               | -2.45 | 0.83 |
| DLAT            | Dihydrolipoamide S-Acetyltransferase (E2 Component Of<br>Pyruvate Dehydrogenase Complex)                           | -2.45 | 0.86 |
| AGPAT3          | 1-Acylglycerol-3-Phosphate O-Acyltransferase 3                                                                     | -2.44 | 0.88 |
| FLJ25530        | Hepatocyte Cell Adhesion Molecule                                                                                  | -2.43 | 0.86 |
| ENST00000307662 | -                                                                                                                  | -2.43 | 0.84 |
| ENST00000295608 | -                                                                                                                  | -2.43 | 0.83 |
| PLEKHG5         | Pleckstrin Homology Domain Containing, Family G (With<br>Rhogef Domain) Member 5                                   | -2.43 | 0.83 |
| RTN3            | Reticulon 3                                                                                                        | -2.43 | 0.88 |
| FLJ25530        | Hepatocyte Cell Adhesion Molecule                                                                                  | -2.42 | 0.83 |
| MRPS25          | Mitochondrial Ribosomal Protein S25                                                                                | -2.42 | 0.85 |
| C8orf4          | Chromosome 8 Open Reading Frame 4                                                                                  | -2.41 | 0.86 |
| THC2437037      | -                                                                                                                  | -2.41 | 0.85 |

|                 |                                                                     |       |      |
|-----------------|---------------------------------------------------------------------|-------|------|
| TUBA8           | Tubulin, Alpha 8                                                    | -2.40 | 0.80 |
| CHP             | Calcium Binding Protein P22                                         | -2.40 | 0.86 |
| FLJ39421        | -                                                                   | -2.40 | 0.87 |
| CB111670        | -                                                                   | -2.40 | 0.86 |
| SAA4            | Serum Amyloid A4, Constitutive                                      | -2.39 | 0.75 |
| ATP5J2          | Atp Synthase, H+ Transporting, Mitochondrial F0 Complex, Subunit F2 | -2.38 | 0.86 |
| C6orf210        | -                                                                   | -2.38 | 0.88 |
| VKORC1L1        | Vitamin K Epoxide Reductase Complex, Subunit 1-Like 1               | -2.38 | 0.84 |
| HSPE1           | Heat Shock 10kda Protein 1 (Chaperonin 10)                          | -2.37 | 0.86 |
| COX4I1          | Cytochrome C Oxidase Subunit Iv Isoform 1                           | -2.37 | 0.86 |
| IGF1            | Insulin-Like Growth Factor 1 (Somatomedin C)                        | -2.37 | 0.85 |
| THC2371907      | -                                                                   | -2.36 | 0.85 |
| PLA2G4A         | Phospholipase A2, Group Iva (Cytosolic, Calcium-Dependent)          | -2.35 | 0.81 |
| MYOM1           | Myomesin 1 (Skelemin) 185kda                                        | -2.35 | 0.82 |
| COX5A           | Cytochrome C Oxidase Subunit Va                                     | -2.35 | 0.87 |
| ACAD9           | Acyl-Coenzyme A Dehydrogenase Family, Member 9                      | -2.34 | 0.85 |
| LDHA            | Lactate Dehydrogenase A                                             | -2.34 | 0.85 |
| NDUFV1          | Nadh Dehydrogenase (Ubiquinone) Flavoprotein 1, 51kda               | -2.33 | 0.90 |
| RTCD1           | Rna Terminal Phosphate Cyclase Domain 1                             | -2.33 | 0.88 |
| SAA4            | Serum Amyloid A4, Constitutive                                      | -2.33 | 0.75 |
| FADS1           | Fatty Acid Desaturase 1                                             | -2.33 | 0.71 |
| ATP6V1D         | Atpase, H+ Transporting, Lysosomal 34kda, V1 Subunit D              | -2.33 | 0.87 |
| THC2337324      | -                                                                   | -2.32 | 0.84 |
| C20orf24        | Chromosome 20 Open Reading Frame 24                                 | -2.32 | 0.84 |
| H19             | H19, Imprinted Maternally Expressed Untranslated Mrna               | -2.32 | 0.77 |
| PPIF            | Peptidylprolyl Isomerase F (Cyclophilin F)                          | -2.32 | 0.82 |
| ENST00000330072 | -                                                                   | -2.31 | 0.88 |
| COX7A2          | Cytochrome C Oxidase Subunit Viia Polypeptide 2 (Liver)             | -2.31 | 0.87 |
| NDUFB7          | Nadh Dehydrogenase (Ubiquinone) 1 Beta Subcomplex, 7, 18kda         | -2.31 | 0.90 |
| HEYL            | Hairy/Enhancer-Of-Split Related With Yrpw Motif-Like                | -2.30 | 0.79 |
| COPS5           | Cop9 Constitutive Photomorphogenic Homolog Subunit 5 (Arabidopsis)  | -2.30 | 0.90 |
| NME1            | Non-Metastatic Cells 1, Protein (Nm23a) Expressed In                | -2.30 | 0.86 |
| THC2295911      | -                                                                   | -2.29 | 0.87 |
| C21orf70        | Chromosome 21 Open Reading Frame 70                                 | -2.29 | 0.89 |
| MCF2L           | Mcf.2 Cell Line Derived Transforming Sequence-Like                  | -2.29 | 0.84 |
| GPRC5C          | G Protein-Coupled Receptor, Family C, Group 5, Member C             | -2.29 | 0.85 |
| POLD2           | Polymerase (Dna Directed), Delta 2, Regulatory Subunit 50kda        | -2.29 | 0.87 |
| CKB             | Creatine Kinase, Brain                                              | -2.29 | 0.84 |
| LOC400969       | -                                                                   | -2.28 | 0.85 |
| GPT             | Glutamic-Pyruvate Transaminase (Alanine Aminotransferase)           | -2.28 | 0.86 |

|                 |                                                                                                |       |      |
|-----------------|------------------------------------------------------------------------------------------------|-------|------|
| CBWD2           | Hypothetical Protein From Clone 1659351                                                        | -2.28 | 0.87 |
| COX7B           | Cytochrome C Oxidase Subunit Viib                                                              | -2.27 | 0.84 |
| MGC45871        | -                                                                                              | -2.27 | 0.85 |
| COX4I1          | Cytochrome C Oxidase Subunit Iv Isoform 1                                                      | -2.26 | 0.87 |
| ENST00000332498 | -                                                                                              | -2.26 | 0.85 |
| NDUFS7          | Nadh Dehydrogenase (Ubiquinone) Fe-S Protein 7, 20kda<br>(Nadh-Coenzyme Q Reductase)           | -2.26 | 0.87 |
| SLC25A5         | Solute Carrier Family 25 (Mitochondrial Carrier; Adenine<br>Nucleotide Translocator), Member 5 | -2.26 | 0.87 |
| S100A16         | S100 Calcium Binding Protein A16                                                               | -2.26 | 0.89 |
| DERL1           | Der1-Like Domain Family, Member 1                                                              | -2.25 | 0.90 |
| ATP5C1          | Atp Synthase, H+ Transporting, Mitochondrial F1 Complex,<br>Gamma Polypeptide 1                | -2.25 | 0.88 |
| PC              | Pyruvate Carboxylase                                                                           | -2.24 | 0.88 |
| SLC25A1         | Solute Carrier Family 25 (Mitochondrial Carrier; Citrate<br>Transporter), Member 1             | -2.24 | 0.85 |
| HIST2H2AA       | Histone 2, H2aa                                                                                | -2.24 | 0.81 |
| MYCBP           | C-Myc Binding Protein                                                                          | -2.24 | 0.86 |
| FBXO9           | F-Box Protein 9                                                                                | -2.24 | 0.88 |
| C16orf49        | -                                                                                              | -2.23 | 0.90 |
| HSPA12A         | Heat Shock Protein 12a                                                                         | -2.23 | 0.82 |
| A_24_P50666     | -                                                                                              | -2.23 | 0.81 |
| PDHX            | Pyruvate Dehydrogenase Complex, Component X                                                    | -2.22 | 0.88 |
| PGK1            | Phosphoglycerate Kinase 1                                                                      | -2.22 | 0.88 |
| MTCH2           | Mitochondrial Carrier Homolog 2 (C. Elegans)                                                   | -2.22 | 0.86 |
| PLA2G4A         | Phospholipase A2, Group Iva (Cytosolic, Calcium-<br>Dependent)                                 | -2.21 | 0.83 |
| A_23_P99731     | -                                                                                              | -2.21 | 0.90 |
| PPIA            | Peptidylprolyl Isomerase A (Cyclophilin A)                                                     | -2.21 | 0.89 |
| MGC4825         | Hypothetical Protein Mgc4825                                                                   | -2.21 | 0.88 |
| THRSP           | Thyroid Hormone Responsive (Spot14 Homolog, Rat)                                               | -2.21 | 0.78 |
| IFT20           | Intraflagellar Transport 20 Homolog (Chlamydomonas)                                            | -2.21 | 0.90 |
| MRAP            | Melanocortin 2 Receptor Accessory Protein                                                      | -2.21 | 0.79 |
| FLJ37964        | -                                                                                              | -2.21 | 0.89 |
| EPHX2           | Epoxide Hydrolase 2, Cytoplasmic                                                               | -2.20 | 0.89 |
| C20orf3         | Chromosome 20 Open Reading Frame 3                                                             | -2.20 | 0.86 |
| ENC1            | Ectodermal-Neural Cortex (With Btb-Like Domain)                                                | -2.20 | 0.88 |
| PFKFB1          | 6-Phosphofructo-2-Kinase/Fructose-2,6-Biphosphatase 1                                          | -2.20 | 0.90 |
| A_24_P152713    | -                                                                                              | -2.19 | 0.85 |
| SIL1            | Sil1 Homolog, Endoplasmic Reticulum Chaperone (S.<br>Cerevisiae)                               | -2.19 | 0.88 |
| SLC25A3         | Solute Carrier Family 25 (Mitochondrial Carrier; Phosphate<br>Carrier), Member 3               | -2.19 | 0.88 |
| A_24_P384210    | -                                                                                              | -2.19 | 0.88 |
| ASAH1           | N-Acylsphingosine Amidohydrolase (Acid Ceramidase) 1                                           | -2.18 | 0.80 |
| ISOC2           | Isochorismatase Domain Containing 2                                                            | -2.18 | 0.85 |
| ATP5J           | Atp Synthase, H+ Transporting, Mitochondrial F0 Complex,                                       | -2.18 | 0.87 |



| Subunit F6      |                                                                                          |       |      |
|-----------------|------------------------------------------------------------------------------------------|-------|------|
| SDHA            | Succinate Dehydrogenase Complex, Subunit A, Flavoprotein (Fp)                            | -2.18 | 0.88 |
| ADPN            | Adiponutrin                                                                              | -2.18 | 0.77 |
| LDHA            | Lactate Dehydrogenase A                                                                  | -2.18 | 0.85 |
| TCTA            | T-Cell Leukemia Translocation Altered Gene                                               | -2.18 | 0.86 |
| CARHSP1         | Calcium Regulated Heat Stable Protein 1, 24kda                                           | -2.17 | 0.87 |
| GPT2            | Glutamic Pyruvate Transaminase (Alanine Aminotransferase) 2                              | -2.17 | 0.85 |
| PLA2G4A         | Phospholipase A2, Group Iva (Cytosolic, Calcium-Dependent)                               | -2.17 | 0.81 |
| ISOC2           | Isochorismatase Domain Containing 2                                                      | -2.17 | 0.86 |
| ADAMTS2         | Adam Metallopeptidase With Thrombospondin Type 1 Motif, 2                                | -2.16 | 0.88 |
| POLDIP2         | Polymerase (Dna-Directed), Delta Interacting Protein 2                                   | -2.16 | 0.91 |
| THC2311248      | -                                                                                        | -2.16 | 0.88 |
| TSPAN18         | Tetraspanin 18                                                                           | -2.16 | 0.88 |
| NUDT8           | Nudix (Nucleoside Diphosphate Linked Moiety X)-Type Motif 8                              | -2.16 | 0.88 |
| BC013295        | -                                                                                        | -2.15 | 0.86 |
| UQCR            | Ubiquinol-Cytochrome C Reductase, 6.4kda Subunit                                         | -2.15 | 0.87 |
| BC035751        | -                                                                                        | -2.15 | 0.89 |
| BC036599        | -                                                                                        | -2.15 | 0.86 |
| PLA2G4A         | Phospholipase A2, Group Iva (Cytosolic, Calcium-Dependent)                               | -2.15 | 0.81 |
| CD164           | Cd164 Antigen, Sialomucin                                                                | -2.15 | 0.87 |
| C16orf33        | Chromosome 16 Open Reading Frame 33                                                      | -2.14 | 0.88 |
| CYCS            | Cytochrome C, Somatic                                                                    | -2.14 | 0.85 |
| ETFB            | Electron-Transfer-Flavoprotein, Beta Polypeptide                                         | -2.14 | 0.87 |
| SULT1A1         | Sulfotransferase Family, Cytosolic, 1a, Phenol-Preferring, Member 1                      | -2.14 | 0.88 |
| SLC35B4         | Solute Carrier Family 35, Member B4                                                      | -2.14 | 0.91 |
| SFRP2           | Secreted Frizzled-Related Protein 2                                                      | -2.13 | 0.75 |
| YWHAZ           | Tyrosine 3-Monooxygenase/Tryptophan 5-Monooxygenase Activation Protein, Zeta Polypeptide | -2.13 | 0.87 |
| BG028463        | -                                                                                        | -2.13 | 0.87 |
| FCN1            | Ficolin (Collagen/Fibrinogen Domain Containing) 1                                        | -2.13 | 0.81 |
| LTB4DH          | Leukotriene B4 12-Hydroxydehydrogenase                                                   | -2.13 | 0.88 |
| SLC24A3         | Solute Carrier Family 24 (Sodium/Potassium/Calcium Exchanger), Member 3                  | -2.12 | 0.85 |
| MOSC1           | Moco Sulphurase C-Terminal Domain Containing 1                                           | -2.12 | 0.90 |
| ENST00000169551 | -                                                                                        | -2.12 | 0.89 |
| A_24_P771278    | -                                                                                        | -2.12 | 0.88 |
| THRSP           | Thyroid Hormone Responsive (Spot14 Homolog, Rat)                                         | -2.12 | 0.76 |
| KCTD10          | Potassium Channel Tetramerisation Domain Containing 10                                   | -2.11 | 0.87 |
| MRPL53          | Mitochondrial Ribosomal Protein L53                                                      | -2.11 | 0.91 |
| TP53I3          | Tumor Protein P53 Inducible Protein 3                                                    | -2.11 | 0.84 |
| HIBCH           | 3-Hydroxyisobutyryl-Coenzyme A Hydrolase                                                 | -2.11 | 0.89 |

|                 |                                                                                                                        |       |      |
|-----------------|------------------------------------------------------------------------------------------------------------------------|-------|------|
| PLA2G4A         | Phospholipase A2, Group Iva (Cytosolic, Calcium-Dependent)                                                             | -2.11 | 0.86 |
| DGAT1           | Diacylglycerol O-Acyltransferase Homolog 1 (Mouse)                                                                     | -2.11 | 0.88 |
| PX19            | Px19-Like Protein                                                                                                      | -2.11 | 0.91 |
| FBXO9           | F-Box Protein 9                                                                                                        | -2.10 | 0.87 |
| COL5A2          | Collagen, Type V, Alpha 2                                                                                              | -2.10 | 0.86 |
| MRPL47          | Mitochondrial Ribosomal Protein L47                                                                                    | -2.10 | 0.90 |
| ENST00000307106 | -                                                                                                                      | -2.10 | 0.89 |
| SLC25A4         | Solute Carrier Family 25 (Mitochondrial Carrier; Adenine Nucleotide Translocator), Member 4                            | -2.10 | 0.91 |
| AKR1C1          | Aldo-Keto Reductase Family 1, Member C1 (Dihydrodiol Dehydrogenase 1; 20-Alpha (3-Alpha)-Hydroxysteroid Dehydrogenase) | -2.10 | 0.84 |
| ATOX1           | Atx1 Antioxidant Protein 1 Homolog (Yeast)                                                                             | -2.10 | 0.86 |
| LFNG            | Lunatic Fringe Homolog (Drosophila)                                                                                    | -2.09 | 0.87 |
| SDHD            | Succinate Dehydrogenase Complex, Subunit D, Integral Membrane Protein                                                  | -2.09 | 0.88 |
| C7orf24         | Chromosome 7 Open Reading Frame 24                                                                                     | -2.09 | 0.91 |
| COX5B           | Cytochrome C Oxidase Subunit Vb                                                                                        | -2.09 | 0.90 |
| PMS2L5          | Postmeiotic Segregation Increased 2-Like 5                                                                             | -2.09 | 0.90 |
| POP4            | Processing Of Precursor 4, Ribonuclease P/Mrp Subunit (S. Cerevisiae)                                                  | -2.09 | 0.91 |
| ZNF219          | Zinc Finger Protein 219                                                                                                | -2.09 | 0.86 |
| RARRES2         | Retinoic Acid Receptor Responder (Tazarotene Induced) 2                                                                | -2.09 | 0.83 |
| A_24_P745670    | -                                                                                                                      | -2.08 | 0.89 |
| FLJ11235        | Hypothetical Protein Flj11235                                                                                          | -2.08 | 0.89 |
| PREB            | Prolactin Regulatory Element Binding                                                                                   | -2.08 | 0.85 |
| C17orf42        | Chromosome 17 Open Reading Frame 42                                                                                    | -2.08 | 0.90 |
| A_24_P594293    | -                                                                                                                      | -2.08 | 0.87 |
| HIP2            | Huntingtin Interacting Protein 2                                                                                       | -2.08 | 0.89 |
| DERL1           | Der1-Like Domain Family, Member 1                                                                                      | -2.07 | 0.89 |
| PCCB            | Propionyl Coenzyme A Carboxylase, Beta Polypeptide                                                                     | -2.07 | 0.89 |
| TUBB2           | Tubulin, beta 2A                                                                                                       | -2.07 | 0.74 |
| GSTK1           | Glutathione S-Transferase Subunit 13 Homolog                                                                           | -2.06 | 0.88 |
| A_24_P739075    | -                                                                                                                      | -2.06 | 0.88 |
| SUCLG1          | Succinate-Coa Ligase, Gdp-Forming, Alpha Subunit                                                                       | -2.06 | 0.88 |
| COX8A           | Cytochrome C Oxidase Subunit 8a (Ubiquitous)                                                                           | -2.06 | 0.89 |
| APBB1IP         | Amyloid Beta (A4) Precursor Protein-Binding, Family B, Member 1 Interacting Protein                                    | -2.06 | 0.84 |
| NQO1            | Nad(P)H Dehydrogenase, Quinone 1                                                                                       | -2.06 | 0.86 |
| MMP28           | Matrix Metalloproteinase 28                                                                                            | -2.05 | 0.87 |
| TIMM13          | Translocase Of Inner Mitochondrial Membrane 13 Homolog (Yeast)                                                         | -2.05 | 0.87 |
| MRPL40          | Nuclear Localization Signal Deleted In Velocardiofacial Syndrome                                                       | -2.05 | 0.90 |
| A_24_P853004    | -                                                                                                                      | -2.05 | 0.90 |
| PLVAP           | Plasmalemma Vesicle Associated Protein                                                                                 | -2.05 | 0.84 |

|                 |                                                                                                                              |       |      |
|-----------------|------------------------------------------------------------------------------------------------------------------------------|-------|------|
| FARSLA          | Phenylalanine-Trna Synthetase-Like, Alpha Subunit                                                                            | -2.04 | 0.90 |
| A_24_P341058    | -                                                                                                                            | -2.04 | 0.89 |
| A_32_P128399    | -                                                                                                                            | -2.04 | 0.85 |
| LRIG1           | Leucine-Rich Repeats And Immunoglobulin-Like Domains 1                                                                       | -2.04 | 0.89 |
| ENST00000328135 | -                                                                                                                            | -2.04 | 0.91 |
| NDUFS3          | Nadh Dehydrogenase (Ubiquinone) Fe-S Protein 3, 30kda<br>(Nadh-Coenzyme Q Reductase)                                         | -2.04 | 0.90 |
| SGCB            | Sarcoglycan, Beta (43kda Dystrophin-Associated<br>Glycoprotein)                                                              | -2.04 | 0.90 |
| A_24_P67432     | -                                                                                                                            | -2.04 | 0.87 |
| UBE2L3          | Ubiquitin-Conjugating Enzyme E2l 3                                                                                           | -2.04 | 0.91 |
| APLN            | Apelin, Agtr1l Ligand                                                                                                        | -2.04 | 0.85 |
| TFPI2           | Tissue Factor Pathway Inhibitor 2                                                                                            | -2.04 | 0.81 |
| A_24_P58477     | -                                                                                                                            | -2.03 | 0.90 |
| A_24_P840868    | -                                                                                                                            | -2.03 | 0.88 |
| SARA1           | SAR1 gene homolog A (S. cerevisiae)                                                                                          | -2.03 | 0.86 |
| AKR1C1          | Aldo-Keto Reductase Family 1, Member C1 (Dihydrodiol<br>Dehydrogenase 1; 20-Alpha (3-Alpha)-Hydroxysteroid<br>Dehydrogenase) | -2.03 | 0.85 |
| BCKDHB          | Branched Chain Keto Acid Dehydrogenase E1, Beta<br>Polypeptide (Maple Syrup Urine Disease)                                   | -2.03 | 0.89 |
| ENST00000332041 | -                                                                                                                            | -2.03 | 0.86 |
| A_24_P25040     | -                                                                                                                            | -2.03 | 0.87 |
| LRRN5           | Leucine Rich Repeat Neuronal 5                                                                                               | -2.03 | 0.90 |
| COG8            | Component Of Oligomeric Golgi Complex 8                                                                                      | -2.02 | 0.89 |
| RASSF4          | Ras Association (Ralgs/Af-6) Domain Family 4                                                                                 | -2.02 | 0.82 |
| TNFRSF21        | Tumor Necrosis Factor Receptor Superfamily, Member 21                                                                        | -2.02 | 0.87 |
| PCCB            | Propionyl Coenzyme A Carboxylase, Beta Polypeptide                                                                           | -2.02 | 0.88 |
| NR2F6           | Nuclear Receptor Subfamily 2, Group F, Member 6                                                                              | -2.02 | 0.88 |
| MRPL12          | Mitochondrial Ribosomal Protein L12                                                                                          | -2.01 | 0.89 |
| NOD9            | Nod9 Protein                                                                                                                 | -2.01 | 0.92 |
| FAH             | Fumarylacetoacetate Hydrolase (Fumarylacetoacetase)                                                                          | -2.01 | 0.88 |
| ATP5J2          | Atp Synthase, H+ Transporting, Mitochondrial F0 Complex,<br>Subunit F2                                                       | -2.01 | 0.87 |
| BOLA3           | Bola-Like 3 (E. Coli)                                                                                                        | -2.01 | 0.88 |
| SLC29A4         | Solute Carrier Family 29 (Nucleoside Transporters), Member<br>4                                                              | -2.01 | 0.87 |
| FLJ37478        | Hypothetical Protein Loc339983                                                                                               | -2.01 | 0.86 |
| LRRN6A          | Leucine Rich Repeat Neuronal 6a                                                                                              | -2.00 | 0.89 |
| C6orf108        | Chromosome 6 Open Reading Frame 108                                                                                          | -2.00 | 0.86 |
| TUBB3           | Melanocortin 1 Receptor (Alpha Melanocyte Stimulating<br>Hormone Receptor)                                                   | -2.00 | 0.80 |
| MPZL1           | Myelin Protein Zero-Like 1                                                                                                   | -2.00 | 0.88 |
| PLA2G4A         | Phospholipase A2, Group Iva (Cytosolic, Calcium-<br>Dependent)                                                               | -2.00 | 0.83 |
| EEF1E1          | Eukaryotic Translation Elongation Factor 1 Epsilon 1                                                                         | -1.99 | 0.89 |
| SLC25A10        | Solute Carrier Family 25 (Mitochondrial Carrier;<br>Dicarboxylate Transporter), Member 10                                    | -1.99 | 0.87 |

|                 |                                                                                             |       |      |
|-----------------|---------------------------------------------------------------------------------------------|-------|------|
| UQCR            | Ubiquinol-Cytochrome C Reductase, 6.4kda Subunit                                            | -1.99 | 0.89 |
| ATP5F1          | Atp Synthase, H+ Transporting, Mitochondrial F0 Complex, Subunit B1                         | -1.99 | 0.89 |
| MGC13017        | Similar To Riken Cdna A430101b06 Gene                                                       | -1.99 | 0.86 |
| NDUFA2          | Nadh Dehydrogenase (Ubiquinone) 1 Alpha Subcomplex, 2, 8kda                                 | -1.99 | 0.89 |
| A_32_P174385    | -                                                                                           | -1.98 | 0.88 |
| MRPS33          | Mitochondrial Ribosomal Protein S33                                                         | -1.98 | 0.88 |
| CCM2            | Cerebral Cavernous Malformation 2                                                           | -1.98 | 0.91 |
| PIGQ            | Phosphatidylinositol Glycan, Class Q                                                        | -1.98 | 0.90 |
| POLR2L          | Polymerase (Rna) Ii (Dna Directed) Polypeptide L, 7.6kda                                    | -1.98 | 0.87 |
| NDUFS2          | Nadh Dehydrogenase (Ubiquinone) Fe-S Protein 2, 49kda (Nadh-Coenzyme Q Reductase)           | -1.97 | 0.88 |
| PNPLA4          | Patatin-Like Phospholipase Domain Containing 4                                              | -1.97 | 0.91 |
| OPLAH           | 5-Oxoprolinase (Atp-Hydrolysing)                                                            | -1.97 | 0.90 |
| IRS1            | Insulin Receptor Substrate 1                                                                | -1.97 | 0.83 |
| COL4A1          | Collagen, Type Iv, Alpha 1                                                                  | -1.97 | 0.87 |
| CCND1           | Cyclin D1                                                                                   | -1.97 | 0.84 |
| NDUFB5          | Nadh Dehydrogenase (Ubiquinone) 1 Beta Subcomplex, 5, 16kda                                 | -1.96 | 0.90 |
| CMKOR1          | Chemokine Orphan Receptor 1                                                                 | -1.96 | 0.88 |
| AK056401        | -                                                                                           | -1.96 | 0.90 |
| NDUFV2          | Nadh Dehydrogenase (Ubiquinone) Flavoprotein 2, 24kda                                       | -1.96 | 0.89 |
| C6orf51         | Chromosome 6 Open Reading Frame 51                                                          | -1.96 | 0.91 |
| TUBB8           | Tubulin, Beta 8                                                                             | -1.96 | 0.80 |
| ACY1            | Aminoacylase 1                                                                              | -1.96 | 0.90 |
| FPR1            | Formyl Peptide Receptor 1                                                                   | -1.95 | 0.84 |
| THC2404941      | -                                                                                           | -1.95 | 0.88 |
| GYPC            | Glycophorin C (Gerbich Blood Group)                                                         | -1.95 | 0.90 |
| GJA1            | Gap Junction Protein, Alpha 1, 43kda (Connexin 43)                                          | -1.95 | 0.88 |
| LOC201158       | -                                                                                           | -1.95 | 0.86 |
| S100A8          | S100 Calcium Binding Protein A8 (Calgranulin A)                                             | -1.95 | 0.72 |
| NDUFA6          | Nadh Dehydrogenase (Ubiquinone) 1 Alpha Subcomplex, 6, 14kda                                | -1.95 | 0.90 |
| SYTL3           | Synaptotagmin-Like 3                                                                        | -1.94 | 0.88 |
| MYLIP           | Myosin Regulatory Light Chain Interacting Protein                                           | -1.94 | 0.87 |
| SLC25A5         | Solute Carrier Family 25 (Mitochondrial Carrier; Adenine Nucleotide Translocator), Member 5 | -1.94 | 0.89 |
| SLC25A5         | Solute Carrier Family 25 (Mitochondrial Carrier; Adenine Nucleotide Translocator), Member 5 | -1.94 | 0.87 |
| NDUFA2          | Nadh Dehydrogenase (Ubiquinone) 1 Alpha Subcomplex, 2, 8kda                                 | -1.94 | 0.90 |
| ENST00000306024 | -                                                                                           | -1.94 | 0.91 |
| PXMP2           | Peroxisomal Membrane Protein 2, 22kda                                                       | -1.94 | 0.87 |
| A_24_P600622    | -                                                                                           | -1.93 | 0.89 |
| CBWD2           | Hypothetical Protein From Clone 1659351                                                     | -1.93 | 0.90 |
| PLA2G4A         | Phospholipase A2, Group Iva (Cytosolic, Calcium-Dependent)                                  | -1.93 | 0.84 |

|                 |                                                                                                                                                          |       |      |
|-----------------|----------------------------------------------------------------------------------------------------------------------------------------------------------|-------|------|
| SLC22A5         | Solute Carrier Family 22 (Organic Cation Transporter), Member 5                                                                                          | -1.93 | 0.88 |
| A_24_P152792    | -                                                                                                                                                        | -1.93 | 0.91 |
| CCND1           | Cyclin D1                                                                                                                                                | -1.93 | 0.87 |
| HIST1H2AD       | Histone 1, H2ad                                                                                                                                          | -1.92 | 0.84 |
| C6orf55         | Chromosome 6 Open Reading Frame 55                                                                                                                       | -1.92 | 0.91 |
| SLC25A11        | Solute Carrier Family 25 (Mitochondrial Carrier; Oxoglutarate Carrier), Member 11                                                                        | -1.92 | 0.90 |
| ACADM           | Acyl-Coenzyme A Dehydrogenase, C-4 To C-12 Straight Chain                                                                                                | -1.92 | 0.87 |
| AK2             | Adenylate Kinase 2                                                                                                                                       | -1.92 | 0.87 |
| RAB9P1          | Rab9, Member Ras Oncogene Family, Pseudogene 1                                                                                                           | -1.92 | 0.89 |
| TUBB6           | Tubulin, Beta 6                                                                                                                                          | -1.92 | 0.78 |
| C2orf7          | Chromosome 2 Open Reading Frame 7                                                                                                                        | -1.92 | 0.87 |
| EPB41L1         | Erythrocyte Membrane Protein Band 4.1-Like 1                                                                                                             | -1.91 | 0.85 |
| ACSL3           | Acyl-Coa Synthetase Long-Chain Family Member 3                                                                                                           | -1.91 | 0.88 |
| MGC14141        | Hypothetical Protein Mgc14141                                                                                                                            | -1.91 | 0.90 |
| NIPSNAP3A       | Nipsnap Homolog 3a (C. Elegans)                                                                                                                          | -1.91 | 0.90 |
| A_24_P264685    | -                                                                                                                                                        | -1.91 | 0.87 |
| PLK2            | Polo-Like Kinase 2 (Drosophila)                                                                                                                          | -1.90 | 0.87 |
| HOOK2           | Hook Homolog 2 (Drosophila)                                                                                                                              | -1.90 | 0.88 |
| ACOX1           | Acyl-Coenzyme A Oxidase 1, Palmitoyl                                                                                                                     | -1.90 | 0.89 |
| CYCS            | Cytochrome C, Somatic                                                                                                                                    | -1.90 | 0.86 |
| SLC25A16        | Solute Carrier Family 25 (Mitochondrial Carrier; Graves Disease Autoantigen), Member 16                                                                  | -1.90 | 0.88 |
| A_24_P921801    | -                                                                                                                                                        | -1.90 | 0.88 |
| P4HB            | Procollagen-Proline, 2-Oxoglutarate 4-Dioxygenase (Proline 4-Hydroxylase), Beta Polypeptide                                                              | -1.89 | 0.88 |
| FXYD6           | Fxyd Domain Containing Ion Transport Regulator 6                                                                                                         | -1.88 | 0.88 |
| LOC388965       | Similar To Hepatitis C Virus Core-Binding Protein 6; Cervical Cancer Oncogene 3                                                                          | -1.88 | 0.90 |
| ABCB6           | Atp-Binding Cassette, Sub-Family B (Mdr/Tap), Member 6                                                                                                   | -1.88 | 0.90 |
| DLD             | Dihydrolipoamide Dehydrogenase (E3 Component Of Pyruvate Dehydrogenase Complex, 2-Oxo-Glutarate Complex, Branched Chain Keto Acid Dehydrogenase Complex) | -1.88 | 0.90 |
| SREBF1          | Sterol Regulatory Element Binding Transcription Factor 1                                                                                                 | -1.88 | 0.79 |
| C3orf1          | Chromosome 3 Open Reading Frame 1                                                                                                                        | -1.88 | 0.91 |
| CLYBL           | Citrate Lyase Beta Like                                                                                                                                  | -1.88 | 0.89 |
| ENST00000308894 | -                                                                                                                                                        | -1.88 | 0.89 |
| ACOX1           | Acyl-Coenzyme A Oxidase 1, Palmitoyl                                                                                                                     | -1.88 | 0.85 |
| THC2345956      | -                                                                                                                                                        | -1.88 | 0.83 |
| PHPT1           | Phosphohistidine Phosphatase 1                                                                                                                           | -1.87 | 0.90 |
| KIAA1036        | -                                                                                                                                                        | -1.87 | 0.88 |
| MRAP            | Melanocortin 2 Receptor Accessory Protein                                                                                                                | -1.87 | 0.84 |
| A_24_P633686    | -                                                                                                                                                        | -1.87 | 0.88 |
| SDHD            | Succinate Dehydrogenase Complex, Subunit D, Integral Membrane Protein                                                                                    | -1.87 | 0.90 |

|              |                                                                                                |       |      |
|--------------|------------------------------------------------------------------------------------------------|-------|------|
| PLVAP        | Plasmalemma Vesicle Associated Protein                                                         | -1.87 | 0.90 |
| F13A1        | Coagulation Factor Xiii, A1 Polypeptide                                                        | -1.86 | 0.80 |
| A_24_P212314 | -                                                                                              | -1.86 | 0.80 |
| BG952851     | -                                                                                              | -1.86 | 0.88 |
| POLR3K       | Polymerase (Rna) Iii (Dna Directed) Polypeptide K, 12.3 Kda                                    | -1.86 | 0.91 |
| MGC11335     | Hypothetical Protein Mgc11335                                                                  | -1.86 | 0.90 |
| PHPT1        | Phosphohistidine Phosphatase 1                                                                 | -1.86 | 0.90 |
| MSRB2        | Methionine Sulfoxide Reductase B2                                                              | -1.86 | 0.90 |
| ITGA6        | Integrin, Alpha 6                                                                              | -1.85 | 0.87 |
| QIL1         | Qil1 Protein                                                                                   | -1.85 | 0.90 |
| MCTS1        | Malignant T Cell Amplified Sequence 1                                                          | -1.85 | 0.90 |
| COX5A        | Cytochrome C Oxidase Subunit Va                                                                | -1.85 | 0.88 |
| IGF1         | Insulin-Like Growth Factor 1 (Somatomedin C)                                                   | -1.85 | 0.87 |
| AK2          | Adenylate Kinase 2                                                                             | -1.85 | 0.89 |
| ALG5         | Asparagine-Linked Glycosylation 5 Homolog (Yeast, Dolichyl-Phosphate Beta-Glucosyltransferase) | -1.84 | 0.92 |
| FLJ10292     | Mago-Nashi Homolog                                                                             | -1.84 | 0.90 |
| MGC15416     | Hypothetical Protein Mgc15416                                                                  | -1.84 | 0.86 |
| NDUFA1       | Nadh Dehydrogenase (Ubiquinone) 1 Alpha Subcomplex, 1, 7.5kda                                  | -1.84 | 0.90 |
| SPCS3        | Signal Peptidase Complex Subunit 3 Homolog (S. Cerevisiae)                                     | -1.84 | 0.88 |
| AK022629     | -                                                                                              | -1.84 | 0.86 |
| UQCRC1       | Ubiquinol-Cytochrome C Reductase Core Protein I                                                | -1.84 | 0.91 |
| LOC92482     | Hypothetical Protein Loc92482                                                                  | -1.84 | 0.90 |
| MGC19780     | -                                                                                              | -1.84 | 0.91 |
| DNCL1        | Dynein, light chain, LC8-type 1                                                                | -1.84 | 0.88 |
| EHD2         | Eh-Domain Containing 2                                                                         | -1.83 | 0.90 |
| DNM1L        | Dynamin 1-Like                                                                                 | -1.83 | 0.91 |
| SMUG1        | Single-Strand-Selective Monofunctional Uracil-Dna Glycosylase 1                                | -1.83 | 0.89 |
| RTN3         | Reticulon 3                                                                                    | -1.82 | 0.89 |
| VAMP5        | Vesicle-Associated Membrane Protein 5 (Myobrevin)                                              | -1.82 | 0.91 |
| MMP17        | Matrix Metalloproteinase 17 (Membrane-Inserted)                                                | -1.82 | 0.91 |
| SH3GLB1      | Sh3-Domain Grb2-Like Endophilin B1                                                             | -1.82 | 0.89 |
| THC2442304   | -                                                                                              | -1.82 | 0.91 |
| AMID         | Hypothetical Protein Mgc13000                                                                  | -1.82 | 0.89 |
| APRT         | Adenine Phosphoribosyltransferase                                                              | -1.81 | 0.89 |
| NDUFA1       | Nadh Dehydrogenase (Ubiquinone) 1 Alpha Subcomplex, 1, 7.5kda                                  | -1.81 | 0.92 |
| NMT1         | N-Myristoyltransferase 1                                                                       | -1.81 | 0.90 |
| FASTK        | Fas-Activated Serine/Threonine Kinase                                                          | -1.81 | 0.90 |
| LOC391020    | Similar To Interferon-Induced Transmembrane Protein 3 (Interferon-Inducible Protein 1-8u)      | -1.81 | 0.88 |
| APBB1IP      | Amyloid Beta (A4) Precursor Protein-Binding, Family B, Member 1 Interacting Protein            | -1.81 | 0.88 |

|                 |                                                                                         |       |      |
|-----------------|-----------------------------------------------------------------------------------------|-------|------|
| PLA2G4A         | Phospholipase A2, Group Iva (Cytosolic, Calcium-Dependent)                              | -1.81 | 0.84 |
| GRHPR           | Glyoxylate Reductase/Hydroxypyruvate Reductase                                          | -1.81 | 0.90 |
| ZNHIT1          | Zinc Finger, Hit Type 1                                                                 | -1.81 | 0.90 |
| TIMM17A         | Translocase Of Inner Mitochondrial Membrane 17 Homolog A (Yeast)                        | -1.81 | 0.88 |
| NDUFA11         | Nadh Dehydrogenase (Ubiquinone) 1 Alpha Subcomplex, 11, 14.7kda                         | -1.80 | 0.89 |
| ZDHHC24         | Zinc Finger, Dhhc-Type Containing 24                                                    | -1.80 | 0.90 |
| CD164           | Cd164 Antigen, Sialomucin                                                               | -1.80 | 0.90 |
| A_23_P315106    | -                                                                                       | -1.80 | 0.91 |
| LOC401270       | -                                                                                       | -1.80 | 0.89 |
| A_24_P101503    | -                                                                                       | -1.80 | 0.91 |
| PX19            | Px19-Like Protein                                                                       | -1.80 | 0.90 |
| MRPL53          | Mitochondrial Ribosomal Protein L53                                                     | -1.80 | 0.91 |
| COX6B1          | Cytochrome C Oxidase Subunit Vib Polypeptide 1 (Ubiquitous)                             | -1.80 | 0.89 |
| PSMA2           | Proteasome (Prosome, Macropain) Subunit, Alpha Type, 2                                  | -1.80 | 0.89 |
| DKFZp586C1924   | -                                                                                       | -1.80 | 0.91 |
| IL32            | Interleukin 32                                                                          | -1.80 | 0.90 |
| ACYP2           | Acylphosphatase 2, Muscle Type                                                          | -1.80 | 0.90 |
| COX7C           | Cytochrome C Oxidase Subunit Viic                                                       | -1.79 | 0.89 |
| MAWBP           | Mawd Binding Protein                                                                    | -1.79 | 0.91 |
| A_23_P254288    | -                                                                                       | -1.79 | 0.88 |
| AKR1C3          | Aldo-Keto Reductase Family 1, Member C3 (3-Alpha Hydroxysteroid Dehydrogenase, Type Ii) | -1.79 | 0.86 |
| RGS16           | Regulator Of G-Protein Signalling 16                                                    | -1.79 | 0.86 |
| ENST00000308836 | -                                                                                       | -1.79 | 0.92 |
| NDUFS6          | Nadh Dehydrogenase (Ubiquinone) Fe-S Protein 6, 13kda (Nadh-Coenzyme Q Reductase)       | -1.79 | 0.90 |
| NID2            | Nidogen 2 (Osteonidogen)                                                                | -1.79 | 0.86 |
| PSMA6           | Proteasome (Prosome, Macropain) Subunit, Alpha Type, 6                                  | -1.79 | 0.89 |
| PMS2L2          | Postmeiotic Segregation Increased 2-Like 2                                              | -1.78 | 0.89 |
| BC007809        | -                                                                                       | -1.78 | 0.90 |
| TIMM10          | Translocase Of Inner Mitochondrial Membrane 10 Homolog (Yeast)                          | -1.78 | 0.91 |
| THC2274391      | -                                                                                       | -1.78 | 0.90 |
| GLT28D1         | Glycosyltransferase 28 Domain Containing 1                                              | -1.78 | 0.90 |
| BOLA2           | Bola-Like 2 (E. Coli)                                                                   | -1.78 | 0.89 |
| EDARADD         | Edar-Associated Death Domain                                                            | -1.78 | 0.88 |
| C16orf9         | Chromosome 16 Open Reading Frame 9                                                      | -1.78 | 0.92 |
| MGC15763        | -                                                                                       | -1.78 | 0.91 |
| THC2271508      | -                                                                                       | -1.78 | 0.86 |
| A_24_P600603    | -                                                                                       | -1.78 | 0.90 |
| PECR            | Peroxisomal Trans-2-Enoyl-Coa Reductase                                                 | -1.77 | 0.90 |
| DAB2IP          | Ngap-Like Protein                                                                       | -1.77 | 0.91 |
| SURF4           | Surfeit 4                                                                               | -1.77 | 0.88 |

|                 |                                                                                     |       |      |
|-----------------|-------------------------------------------------------------------------------------|-------|------|
| MRPL13          | Mitochondrial Ribosomal Protein L13                                                 | -1.77 | 0.90 |
| MRPS18C         | Mitochondrial Ribosomal Protein S18c                                                | -1.77 | 0.92 |
| ENST00000276672 | -                                                                                   | -1.77 | 0.91 |
| PGAM1           | Phosphoglycerate Mutase 1 (Brain)                                                   | -1.76 | 0.89 |
| NCE2            | Ubiquitin-conjugating enzyme E2F (putative)                                         | -1.76 | 0.93 |
| LOC128977       | Hypothetical Protein Loc128977                                                      | -1.76 | 0.93 |
| C14orf156       | Chromosome 14 Open Reading Frame 156                                                | -1.76 | 0.90 |
| DTX1            | Deltex Homolog 1 (Drosophila)                                                       | -1.76 | 0.89 |
| NCBP2           | Nuclear Cap Binding Protein Subunit 2, 20kda                                        | -1.76 | 0.90 |
| MRPL23          | Mitochondrial Ribosomal Protein L23                                                 | -1.76 | 0.91 |
| CK819477        | -                                                                                   | -1.76 | 0.89 |
| PTPLB           | Protein Tyrosine Phosphatase-Like (Proline Instead Of Catalytic Arginine), Member B | -1.76 | 0.80 |
| FBXW5           | F-Box And Wd-40 Domain Protein 5                                                    | -1.76 | 0.90 |
| ATR             | Ataxia Telangiectasia And Rad3 Related                                              | -1.76 | 0.88 |
| C14orf126       | Chromosome 14 Open Reading Frame 126                                                | -1.76 | 0.92 |
| AURKAIP1        | Aurora Kinase A Interacting Protein 1                                               | -1.76 | 0.90 |
| BU595528        | -                                                                                   | -1.75 | 0.90 |
| C21orf6         | Chromosome 21 Open Reading Frame 6                                                  | -1.75 | 0.90 |
| CXX1            | Caax Box 1                                                                          | -1.74 | 0.91 |
| COX4NB          | Cox4 Neighbor                                                                       | -1.74 | 0.91 |
| C5orf18         | -                                                                                   | -1.74 | 0.89 |
| FLJ12436        | -                                                                                   | -1.74 | 0.91 |
| FBXO33          | F-Box Protein 33                                                                    | -1.74 | 0.90 |
| NPB             | Neuropeptide B                                                                      | -1.74 | 0.88 |
| ZNF219          | Zinc Finger Protein 219                                                             | -1.74 | 0.87 |
| A_24_P910169    | -                                                                                   | -1.73 | 0.91 |
| PHB             | Prohibitin                                                                          | -1.73 | 0.91 |
| COPB2           | Coatomer Protein Complex, Subunit Beta 2 (Beta Prime)                               | -1.73 | 0.92 |
| CECR4           | Cat Eye Syndrome Chromosome Region, Candidate 4                                     | -1.73 | 0.89 |
| CXCR4           | Chemokine (C-X-C Motif) Receptor 4                                                  | -1.73 | 0.88 |
| ENG             | Endoglin (Osler-Rendu-Weber Syndrome 1)                                             | -1.72 | 0.89 |
| AGPAT3          | 1-Acylglycerol-3-Phosphate O-Acyltransferase 3                                      | -1.72 | 0.88 |
| A_24_P679796    | -                                                                                   | -1.72 | 0.89 |
| CAV2            | Caveolin 2                                                                          | -1.72 | 0.91 |
| CV323793        | -                                                                                   | -1.72 | 0.88 |
| C10orf74        | -                                                                                   | -1.71 | 0.89 |
| TSSC1           | Tumor Suppressing Subtransferable Candidate 1                                       | -1.71 | 0.91 |
| SERPINB1        | Serpin Peptidase Inhibitor, Clade B (Ovalbumin), Member 1                           | -1.71 | 0.90 |
| MOCS2           | Molybdenum Cofactor Synthesis 2                                                     | -1.71 | 0.90 |
| UQCRC2          | Ubiquinol-Cytochrome C Reductase Core Protein Ii                                    | -1.71 | 0.92 |
| ENST00000361329 | -                                                                                   | -1.71 | 0.91 |
| SPR             | Sepiapterin Reductase (7,8-Dihydrobiopterin:Nadp+ Oxidoreductase)                   | -1.71 | 0.91 |
| ATPAF1          | Atp Synthase Mitochondrial F1 Complex Assembly Factor 1                             | -1.70 | 0.89 |



|          |                                                                                     |       |      |
|----------|-------------------------------------------------------------------------------------|-------|------|
| NCBP1    | Nuclear Cap Binding Protein Subunit 1, 80kda                                        | -1.70 | 0.92 |
| DRAP1    | Dr1-Associated Protein 1 (Negative Cofactor 2 Alpha)                                | -1.70 | 0.92 |
| HINT1    | Histidine Triad Nucleotide Binding Protein 1                                        | -1.70 | 0.92 |
| APBB1IP  | Amyloid Beta (A4) Precursor Protein-Binding, Family B, Member 1 Interacting Protein | -1.70 | 0.85 |
| NDUFB7   | Nadh Dehydrogenase (Ubiquinone) 1 Beta Subcomplex, 7, 18kda                         | -1.69 | 0.91 |
| TRIM10   | Tripartite Motif-Containing 10                                                      | -1.69 | 0.92 |
| BX490547 | -                                                                                   | -1.69 | 0.90 |
| GPI      | Glucose Phosphate Isomerase                                                         | -1.69 | 0.89 |
| TRA1     | Heat shock protein 90kDa beta (Grp94), member 1                                     | -1.69 | 0.87 |
| GPAA1    | Glycosylphosphatidylinositol Anchor Attachment Protein 1 Homolog (Yeast)            | -1.68 | 0.93 |
| CIDEC    | Cell Death-Inducing Dffa-Like Effector C                                            | -1.68 | 0.83 |
| CBWD3    | Hypothetical Protein From Clone 1659351                                             | -1.68 | 0.91 |
| GIMAP5   | Gtpase, Imap Family Member 5                                                        | -1.68 | 0.90 |

***Energy Restriction (ER)***

***Up Regulated Genes***

|                 |                                                                                       |      |      |
|-----------------|---------------------------------------------------------------------------------------|------|------|
| RARRES1         | Retinoic Acid Receptor Responder (Tazarotene Induced) 1                               | 4.54 | 1.41 |
| MIG-6           | ERBB receptor feedback inhibitor 1                                                    | 4.39 | 1.27 |
| ENST00000315208 | -                                                                                     | 3.62 | 1.30 |
| EDN1            | Endothelin 1                                                                          | 3.46 | 1.75 |
| NAP1L1          | Nucleosome Assembly Protein 1-Like 1                                                  | 3.46 | 1.29 |
| THC2403712      | -                                                                                     | 3.44 | 1.24 |
| A_24_P332292    | -                                                                                     | 3.44 | 1.17 |
| GADD45A         | Growth Arrest And Dna-Damage-Inducible, Alpha                                         | 3.29 | 1.27 |
| ALDH1A1         | Aldehyde Dehydrogenase 1 Family, Member A1                                            | 3.21 | 1.27 |
| FHL1            | Four And A Half Lim Domains 1                                                         | 3.20 | 1.43 |
| EPB41L4B        | Erythrocyte Membrane Protein Band 4.1 Like 4b                                         | 3.16 | 1.41 |
| TIGA1           | Tiga1                                                                                 | 3.16 | 1.19 |
| ROBO3           | Roundabout, Axon Guidance Receptor, Homolog 3 (Drosophila)                            | 2.99 | 1.25 |
| GPX3            | Glutathione Peroxidase 3 (Plasma)                                                     | 2.98 | 1.62 |
| AL833309        | -                                                                                     | 2.92 | 1.25 |
| ANGPTL4         | Angiopoietin-Like 4                                                                   | 2.85 | 1.28 |
| ADH1C           | Alcohol Dehydrogenase 1a (Class I), Alpha Polypeptide                                 | 2.85 | 1.38 |
| C7              | Complement Component 7                                                                | 2.83 | 1.27 |
| VAT1            | Vesicle Amine Transport Protein 1 Homolog (T Californica)                             | 2.79 | 1.22 |
| CDKN1C          | Cyclin-Dependent Kinase Inhibitor 1c (P57, Kip2)                                      | 2.77 | 1.26 |
| ADH1A           | Alcohol Dehydrogenase 1a (Class I), Alpha Polypeptide                                 | 2.75 | 1.39 |
| HTRA3           | Htra Serine Peptidase 3                                                               | 2.73 | 1.48 |
| PDE4A           | Phosphodiesterase 4a, Camp-Specific (Phosphodiesterase E2 Duncce Homolog, Drosophila) | 2.71 | 1.12 |
| MXI1            | Max Interactor 1                                                                      | 2.69 | 1.18 |
| GPRASP1         | G Protein-Coupled Receptor Associated Sorting Protein 1                               | 2.68 | 1.20 |

|                                  |                                                                                                   |       |      |
|----------------------------------|---------------------------------------------------------------------------------------------------|-------|------|
| ADH1B                            | Alcohol Dehydrogenase 1a (Class I), Alpha Polypeptide                                             | 2.67  | 1.28 |
| SMARCC2                          | Swi/Snf Related, Matrix Associated, Actin Dependent Regulator Of Chromatin, Subfamily C, Member 2 | 2.66  | 1.18 |
| FAM59A                           | Family With Sequence Similarity 59, Member A                                                      | 2.66  | 1.20 |
| AK123972                         | -                                                                                                 | 2.65  | 1.18 |
| ADH1A                            | Alcohol Dehydrogenase 1a (Class I), Alpha Polypeptide                                             | 2.65  | 1.37 |
| CBX7                             | Chromobox Homolog 7                                                                               | 2.64  | 1.25 |
| CIRBP                            | Cold Inducible Rna Binding Protein                                                                | 2.63  | 1.17 |
| MAN2A2                           | Mannosidase, Alpha, Class 2a, Member 2                                                            | 2.63  | 1.26 |
| ZNF395                           | Hypothetical Protein Dkfzp434k1210                                                                | 2.61  | 1.17 |
| SETBP1                           | Set Binding Protein 1                                                                             | 2.60  | 1.21 |
| ENST00000333615                  | -                                                                                                 | 2.58  | 1.27 |
| C9orf111                         | Hypothetical Protein Flj31318                                                                     | 2.55  | 1.16 |
| CIDEA                            | Cell Death-Inducing Dffa-Like Effector A                                                          | 2.54  | 1.51 |
| CSDE1                            | Cold Shock Domain Containing E1, Rna-Binding                                                      | 2.52  | 1.14 |
| FABP4                            | Fatty Acid Binding Protein 4, Adipocyte                                                           | 2.50  | 1.25 |
| GEM                              | Gtp Binding Protein Overexpressed In Skeletal Muscle                                              | 2.47  | 1.22 |
| IMPA2                            | Inositol(Myo)-1(Or 4)-Monophosphatase 2                                                           | 2.46  | 1.19 |
| <b>Weight Stabilization (WS)</b> | <b>Down Regulated Genes</b>                                                                       |       |      |
| CAPG                             | Capping Protein (Actin Filament), Gelsolin-Like                                                   | -9.03 | 0.66 |
| ITGAX                            | Integrin, Alpha X (Complement Component 3 Receptor 4 Subunit)                                     | -8.90 | 0.62 |
| SLAMF8                           | Slam Family Member 8                                                                              | -8.21 | 0.64 |
| A_24_P281683                     | -                                                                                                 | -8.01 | 0.70 |
| GDF15                            | Growth Differentiation Factor 15                                                                  | -8.00 | 0.49 |
| LIPA                             | Lipase A, Lysosomal Acid, Cholesterol Esterase (Wolman Disease)                                   | -7.94 | 0.45 |
| CD52                             | Cd52 Antigen (Campath-1 Antigen)                                                                  | -7.83 | 0.40 |
| RARRES1                          | Retinoic Acid Receptor Responder (Tazarotene Induced) 1                                           | -7.68 | 0.57 |
| CTSB                             | Cathepsin B                                                                                       | -7.64 | 0.61 |
| ACP5                             | Acid Phosphatase 5, Tartrate Resistant                                                            | -7.53 | 0.32 |
| FBP1                             | Fructose-1,6-Bisphosphatase 1                                                                     | -7.42 | 0.55 |
| ATP6V1B2                         | Atpase, H+ Transporting, Lysosomal 56/58kda, V1 Subunit B2                                        | -6.98 | 0.78 |
| LAPTM5                           | Lysosomal Associated Multispanning Membrane Protein 5                                             | -6.92 | 0.67 |
| ENST00000313481                  | -                                                                                                 | -6.85 | 0.70 |
| LCP1                             | Lymphocyte Cytosolic Protein 1 (L-Plastin)                                                        | -6.62 | 0.58 |
| HCST                             | Hematopoietic Cell Signal Transducer                                                              | -6.47 | 0.61 |
| LAPTM5                           | Lysosomal Associated Multispanning Membrane Protein 5                                             | -6.40 | 0.63 |
| CHI3L1                           | Chitinase 3-Like 1 (Cartilage Glycoprotein-39)                                                    | -6.38 | 0.59 |
| TYROBP                           | Tyro Protein Tyrosine Kinase Binding Protein                                                      | -6.35 | 0.59 |
| GLIPR1                           | Gli Pathogenesis-Related 1 (Glioma)                                                               | -6.30 | 0.70 |
| CTSB                             | Cathepsin B                                                                                       | -6.11 | 0.62 |
| CPVL                             | Carboxypeptidase, Vitellogenic-Like                                                               | -6.06 | 0.72 |

|              |                                                                                               |       |      |
|--------------|-----------------------------------------------------------------------------------------------|-------|------|
| ITGB2        | Integrin, Beta 2 (Complement Component 3 Receptor 3 And 4 Subunit)                            | -5.96 | 0.51 |
| KYNU         | Kynureninase (L-Kynurenine Hydrolase)                                                         | -5.91 | 0.70 |
| ATP1B1       | Atpase, Na+/K+ Transporting, Beta 1 Polypeptide                                               | -5.89 | 0.57 |
| ST14         | Suppression Of Tumorigenicity 14 (Colon Carcinoma)                                            | -5.88 | 0.66 |
| IFI30        | Interferon, Gamma-Inducible Protein 30                                                        | -5.80 | 0.42 |
| GLA          | Galactosidase, Alpha                                                                          | -5.73 | 0.81 |
| -            | Cd68 Antigen                                                                                  | -5.73 | 0.59 |
| CCR1         | Chemokine (C-C Motif) Receptor 1                                                              | -5.71 | 0.56 |
| DHRS9        | Dehydrogenase/Reductase (Sdr Family) Member 9                                                 | -5.67 | 0.60 |
| BCAT1        | Branched Chain Aminotransferase 1, Cytosolic                                                  | -5.60 | 0.67 |
| CD53         | Cd53 Antigen                                                                                  | -5.58 | 0.72 |
| RNASET2      | Ribonuclease T2                                                                               | -5.50 | 0.73 |
| CTSS         | Cathepsin S                                                                                   | -5.49 | 0.62 |
| ATF3         | Activating Transcription Factor 3                                                             | -5.45 | 0.65 |
| VAMP8        | Vesicle-Associated Membrane Protein 8 (Endobrevin)                                            | -5.39 | 0.68 |
| C19orf28     | Hypothetical Protein Pp3501                                                                   | -5.37 | 0.70 |
| PLA2G7       | Phospholipase A2, Group Vii (Platelet-Activating Factor Acetylhydrolase, Plasma)              | -5.24 | 0.43 |
| ITGB5        | Integrin, Beta 5                                                                              | -5.19 | 0.78 |
| CR603184     | -                                                                                             | -5.13 | 0.80 |
| SLC38A6      | Solute Carrier Family 38, Member 6                                                            | -5.12 | 0.75 |
| AADAACL1     | Arylacetamide Deacetylase-Like 1                                                              | -5.11 | 0.55 |
| C1orf162     | Chromosome 1 Open Reading Frame 162                                                           | -5.10 | 0.63 |
| HEXB         | Hexosaminidase B (Beta Polypeptide)                                                           | -5.10 | 0.74 |
| IL4I1        | Interleukin 4 Induced 1                                                                       | -5.09 | 0.65 |
| -            | Cd163 Antigen                                                                                 | -5.02 | 0.59 |
| CNKSR3       | Cnksr Family Member 3                                                                         | -5.00 | 0.79 |
| A_23_P170719 | -                                                                                             | -4.95 | 0.63 |
| PGDS         | Prostaglandin D2 Synthase, Hematopoietic                                                      | -4.95 | 0.73 |
| FTHL17       | Ferritin, Heavy Polypeptide-Like 17                                                           | -4.94 | 0.76 |
| CTSB         | Cathepsin B                                                                                   | -4.94 | 0.72 |
| ITGAM        | Integrin, Alpha M (Complement Component 3 Receptor 3 Subunit)                                 | -4.86 | 0.72 |
| GATM         | Glycine Amidinotransferase (L-Arginine:Glycine Amidinotransferase)                            | -4.86 | 0.76 |
| PPT1         | Palmitoyl-Protein Thioesterase 1 (Ceroid-Lipofuscinosis, Neuronal 1, Infantile)               | -4.85 | 0.85 |
| TIMP2        | Timp Metallopeptidase Inhibitor 2                                                             | -4.85 | 0.85 |
| NPL          | N-Acetylneuraminase Pyruvate Lyase (Dihydrodipicolinate Synthase)                             | -4.84 | 0.65 |
| IRF5         | Interferon Regulatory Factor 5                                                                | -4.83 | 0.73 |
| HMOX1        | Heme Oxygenase (Decycling) 1                                                                  | -4.82 | 0.58 |
| EMILIN2      | Elastin Microfibril Interfacer 2                                                              | -4.78 | 0.60 |
| SPP1         | Secreted Phosphoprotein 1 (Osteopontin, Bone Sialoprotein I, Early T-Lymphocyte Activation 1) | -4.76 | 0.23 |
| CALM3        | Calmodulin 1 (Phosphorylase Kinase, Delta)                                                    | -4.72 | 0.73 |

|                 |                                                                                               |       |      |
|-----------------|-----------------------------------------------------------------------------------------------|-------|------|
| LHFPL2          | Lipoma Hmgic Fusion Partner-Like 2                                                            | -4.67 | 0.73 |
| SPINT2          | Serine Peptidase Inhibitor, Kunitz Type, 2                                                    | -4.66 | 0.77 |
| GPX3            | Glutathione Peroxidase 3 (Plasma)                                                             | -4.65 | 0.66 |
| C22orf9         | Chromosome 22 Open Reading Frame 9                                                            | -4.61 | 0.73 |
| ATP6V0B         | Atpase, H+ Transporting, Lysosomal 21kda, V0 Subunit B                                        | -4.60 | 0.84 |
| K03200          | -                                                                                             | -4.59 | 0.79 |
| HAVCR2          | Hepatitis A Virus Cellular Receptor 2                                                         | -4.57 | 0.68 |
| C1orf38         | Chromosome 1 Open Reading Frame 38                                                            | -4.57 | 0.68 |
| SLC7A7          | Solute Carrier Family 7 (Cationic Amino Acid Transporter, Y+ System), Member 7                | -4.56 | 0.76 |
| ANGPTL4         | Angiopoietin-Like 4                                                                           | -4.55 | 0.63 |
| CIAS1           | Chromosome 1 Open Reading Frame 7                                                             | -4.53 | 0.82 |
| SPP1            | Secreted Phosphoprotein 1 (Osteopontin, Bone Sialoprotein I, Early T-Lymphocyte Activation 1) | -4.52 | 0.38 |
| SPP1            | Secreted Phosphoprotein 1 (Osteopontin, Bone Sialoprotein I, Early T-Lymphocyte Activation 1) | -4.51 | 0.38 |
| FLJ11000        | Hypothetical Protein Flj11000                                                                 | -4.47 | 0.85 |
| CTSC            | Cathepsin C                                                                                   | -4.46 | 0.78 |
| SPP1            | Secreted Phosphoprotein 1 (Osteopontin, Bone Sialoprotein I, Early T-Lymphocyte Activation 1) | -4.45 | 0.38 |
| GUSB            | Glucuronidase, Beta                                                                           | -4.44 | 0.77 |
| ARRB2           | Arrestin, Beta 2                                                                              | -4.43 | 0.77 |
| MS4A4A          | Membrane-Spanning 4-Domains, Subfamily A, Member 4                                            | -4.43 | 0.62 |
| SPP1            | Secreted Phosphoprotein 1 (Osteopontin, Bone Sialoprotein I, Early T-Lymphocyte Activation 1) | -4.41 | 0.40 |
| SPP1            | Secreted Phosphoprotein 1 (Osteopontin, Bone Sialoprotein I, Early T-Lymphocyte Activation 1) | -4.40 | 0.39 |
| CTSD            | Cathepsin D (Lysosomal Aspartyl Peptidase)                                                    | -4.40 | 0.71 |
| BC040653        | -                                                                                             | -4.39 | 0.83 |
| SPP1            | Secreted Phosphoprotein 1 (Osteopontin, Bone Sialoprotein I, Early T-Lymphocyte Activation 1) | -4.39 | 0.39 |
| GABARAPL1       | Gaba(A) Receptor-Associated Protein Like 1                                                    | -4.39 | 0.89 |
| ATP1B1          | Atpase, Na+/K+ Transporting, Beta 1 Polypeptide                                               | -4.38 | 0.72 |
| SLC15A3         | Solute Carrier Family 15, Member 3                                                            | -4.35 | 0.74 |
| MMP9            | Matrix Metallopeptidase 9 (Gelatinase B, 92kda Gelatinase, 92kda Type Iv Collagenase)         | -4.35 | 0.41 |
| SPP1            | Secreted Phosphoprotein 1 (Osteopontin, Bone Sialoprotein I, Early T-Lymphocyte Activation 1) | -4.34 | 0.39 |
| MMP19           | Matrix Metalloproteinase 18                                                                   | -4.33 | 0.75 |
| SOAT1           | Sterol O-Acyltransferase (Acyl-Coenzyme A: Cholesterol Acyltransferase) 1                     | -4.32 | 0.82 |
| C10orf125       | Chromosome 10 Open Reading Frame 125                                                          | -4.32 | 0.83 |
| ENST00000260045 | -                                                                                             | -4.32 | 0.87 |
| RAC2            | Ras-Related C3 Botulinum Toxin Substrate 2 (Rho Family, Small Gtp Binding Protein Rac2)       | -4.30 | 0.77 |
| BLOC1S2         | Biogenesis Of Lysosome-Related Organelles Complex-1, Subunit 2                                | -4.29 | 0.82 |
| FGR             | Gardner-Rasheed Feline Sarcoma Viral (V-Fgr) Oncogene Homolog                                 | -4.29 | 0.68 |

|                 |                                                                                        |       |      |
|-----------------|----------------------------------------------------------------------------------------|-------|------|
| SCARA3          | Scavenger Receptor Class A, Member 3                                                   | -4.27 | 0.77 |
| CTSL            | Cathepsin L                                                                            | -4.27 | 0.75 |
| EBI2            | Epstein-Barr Virus Induced Gene 2 (Lymphocyte-Specific G Protein-Coupled Receptor)     | -4.26 | 0.74 |
| SLC16A3         | Solute Carrier Family 16 (Monocarboxylic Acid Transporters), Member 3                  | -4.26 | 0.70 |
| TTC7B           | Tetratricopeptide Repeat Domain 7b                                                     | -4.25 | 0.82 |
| MGC17337        | -                                                                                      | -4.24 | 0.88 |
| FTH1            | Ferritin, Heavy Polypeptide 1                                                          | -4.23 | 0.78 |
| A_24_P755069    | -                                                                                      | -4.22 | 0.79 |
| BQ049338        | -                                                                                      | -4.21 | 0.66 |
| GLIPR1          | Gli Pathogenesis-Related 1 (Glioma)                                                    | -4.18 | 0.79 |
| METRNL          | Meteorin, Glial Cell Differentiation Regulator-Like                                    | -4.18 | 0.75 |
| SEMA3G          | Sema Domain, Immunoglobulin Domain (Ig), Short Basic Domain, Secreted, (Semaphorin) 3g | -4.17 | 0.71 |
| ERO1L           | Ero1-Like ( <i>S. Cerevisiae</i> )                                                     | -4.16 | 0.87 |
| SPOCD1          | Spoc Domain Containing 1                                                               | -4.14 | 0.63 |
| MMP19           | Matrix Metalloproteinase 18                                                            | -4.13 | 0.71 |
| HLA-DMB         | Major Histocompatibility Complex, Class Ii, Dm Beta                                    | -4.13 | 0.76 |
| GPC4            | Glypican 4                                                                             | -4.12 | 0.80 |
| LYZ             | Lysozyme (Renal Amyloidosis)                                                           | -4.11 | 0.71 |
| MT1E            | Metallothionein 1e (Functional)                                                        | -4.11 | 0.83 |
| CSTB            | Cystatin B (Stefin B)                                                                  | -4.11 | 0.80 |
| FABP4           | Fatty Acid Binding Protein 4, Adipocyte                                                | -4.10 | 0.77 |
| RNASET2         | Ribonuclease T2                                                                        | -4.09 | 0.73 |
| MS4A7           | Membrane-Spanning 4-Domains, Subfamily A, Member 7                                     | -4.09 | 0.68 |
| THC2279832      | -                                                                                      | -4.08 | 0.76 |
| IGSF21          | Immunoglobulin Superfamily, Member 21                                                  | -4.07 | 0.71 |
| TRIM16          | Tripartite Motif-Containing 16                                                         | -4.07 | 0.83 |
| KIAA1212        | Hypothetical Protein Loc55580                                                          | -4.06 | 0.88 |
| CD83            | Cd83 Antigen (Activated B Lymphocytes, Immunoglobulin Superfamily)                     | -4.05 | 0.71 |
| MS4A6A          | Cd20-Like Precursor                                                                    | -4.03 | 0.76 |
| KIAA1598        | Kiaa1598                                                                               | -4.03 | 0.81 |
| SQSTM1          | Sequestosome 1                                                                         | -4.00 | 0.72 |
| BX647543        | -                                                                                      | -3.99 | 0.72 |
| VSIG4           | V-Set And Immunoglobulin Domain Containing 4                                           | -3.98 | 0.63 |
| GSTO1           | Glutathione S-Transferase Omega 1                                                      | -3.96 | 0.82 |
| GPC1            | Glypican 1                                                                             | -3.94 | 0.75 |
| WDFY4           | Wdfy Family Member 4                                                                   | -3.93 | 0.73 |
| C19orf28        | Hypothetical Protein Pp3501                                                            | -3.92 | 0.74 |
| RPS27L          | Ribosomal Protein S27-Like                                                             | -3.92 | 0.88 |
| MBP             | Myelin Basic Protein                                                                   | -3.92 | 0.85 |
| TTYH3           | Tweety Homolog 3 ( <i>Drosophila</i> )                                                 | -3.91 | 0.77 |
| ENST00000342020 | -                                                                                      | -3.91 | 0.80 |
| MFSD1           | Major Facilitator Superfamily Domain Containing 1                                      | -3.90 | 0.81 |

|                 |                                                                                                        |       |      |
|-----------------|--------------------------------------------------------------------------------------------------------|-------|------|
| LGMN            | Legumain                                                                                               | -3.90 | 0.75 |
| C6orf115        | Chromosome 6 Open Reading Frame 115                                                                    | -3.88 | 0.82 |
| A_24_P475115    | -                                                                                                      | -3.88 | 0.80 |
| TFRC            | Transferrin Receptor (P90, Cd71)                                                                       | -3.88 | 0.74 |
| LDLR            | Low Density Lipoprotein Receptor (Familial Hypercholesterolemia)                                       | -3.87 | 0.69 |
| RGS10           | Regulator Of G-Protein Signalling 10                                                                   | -3.87 | 0.76 |
| HSD11B1         | Hydroxysteroid (11-Beta) Dehydrogenase 1                                                               | -3.86 | 0.71 |
| MGC45806        | -                                                                                                      | -3.85 | 0.74 |
| SMS             | Spermine Synthase                                                                                      | -3.84 | 0.86 |
| APOC1           | Apolipoprotein C-I                                                                                     | -3.83 | 0.55 |
| FLJ22875        | -                                                                                                      | -3.80 | 0.82 |
| FCGR2B          | Fc Fragment Of Igg, Low Affinity Iib, Receptor (Cd32)                                                  | -3.80 | 0.75 |
| SGK             | Serum/Glucocorticoid Regulated Kinase                                                                  | -3.79 | 0.71 |
| AHCYL1          | S-Adenosylhomocysteine Hydrolase-Like 1                                                                | -3.78 | 0.89 |
| RAC2            | Ras-Related C3 Botulinum Toxin Substrate 2 (Rho Family, Small Gtp Binding Protein Rac2)                | -3.77 | 0.75 |
| AIF1            | Allograft Inflammatory Factor 1                                                                        | -3.75 | 0.75 |
| NRP2            | Neuropilin 2                                                                                           | -3.75 | 0.86 |
| RHOQ            | Ras Homolog Gene Family, Member Q                                                                      | -3.74 | 0.83 |
| THC2364841      | -                                                                                                      | -3.73 | 0.80 |
| EFHD2           | Ef-Hand Domain Family, Member D2                                                                       | -3.73 | 0.82 |
| FN5             | Fn5 Protein                                                                                            | -3.73 | 0.79 |
| NAP1L1          | Nucleosome Assembly Protein 1-Like 1                                                                   | -3.72 | 0.80 |
| A_24_P264416    | -                                                                                                      | -3.70 | 0.82 |
| TPM3            | Tropomyosin 3                                                                                          | -3.70 | 0.84 |
| CR593158        | -                                                                                                      | -3.68 | 0.79 |
| SLCO2B1         | Solute Carrier Organic Anion Transporter Family, Member 2b1                                            | -3.67 | 0.68 |
| TRPV2           | Vanilloid Receptor-Like Protein 1                                                                      | -3.67 | 0.78 |
| CSF1R           | Colony Stimulating Factor 1 Receptor, Formerly Mcdonough Feline Sarcoma Viral (V-Fms) Oncogene Homolog | -3.65 | 0.70 |
| SCPEP1          | Serine Carboxypeptidase 1                                                                              | -3.65 | 0.85 |
| AF086044        | -                                                                                                      | -3.64 | 0.81 |
| ACTB            | Actin, Beta                                                                                            | -3.64 | 0.80 |
| LSP1            | Lymphocyte-Specific Protein 1                                                                          | -3.63 | 0.75 |
| RAB31           | Rab31, Member Ras Oncogene Family                                                                      | -3.62 | 0.83 |
| MT1B            | Metallothionein 1b (Functional)                                                                        | -3.62 | 0.85 |
| PLD3            | Phospholipase D Family, Member 3                                                                       | -3.61 | 0.74 |
| ENST00000333615 | -                                                                                                      | -3.61 | 0.82 |
| ADFP            | Adipose Differentiation-Related Protein                                                                | -3.61 | 0.80 |
| BLOC1S2         | Biogenesis Of Lysosome-Related Organelles Complex-1, Subunit 2                                         | -3.60 | 0.84 |
| TXN             | Thioredoxin                                                                                            | -3.60 | 0.80 |
| FUCA1           | Fucosidase, Alpha-L- 1, Tissue                                                                         | -3.60 | 0.71 |
| MAFB            | V-Maf Musculoaponeurotic Fibrosarcoma Oncogene                                                         | -3.59 | 0.74 |

|                 | Homolog B (Avian)                                                                                          |       |      |
|-----------------|------------------------------------------------------------------------------------------------------------|-------|------|
| CSDE1           | Cold Shock Domain Containing E1, Rna-Binding                                                               | -3.59 | 0.85 |
| SYK             | Spleen Tyrosine Kinase                                                                                     | -3.56 | 0.79 |
| FCGR2A          | Fc Fragment Of Igg, Low Affinity Iia, Receptor (Cd32)                                                      | -3.55 | 0.83 |
| TRAF3           | Tnf Receptor-Associated Factor 3                                                                           | -3.54 | 0.88 |
| MARVELD1        | Marvel Domain Containing 1                                                                                 | -3.54 | 0.80 |
| AL122093        | -                                                                                                          | -3.54 | 0.81 |
| IL10RA          | Interleukin 10 Receptor, Alpha                                                                             | -3.53 | 0.71 |
| PAPLN           | Papilin, Proteoglycan-Like Sulfated Glycoprotein                                                           | -3.52 | 0.80 |
| ATP6AP1         | Atpase, H+ Transporting, Lysosomal Accessory Protein 1                                                     | -3.51 | 0.88 |
| SLC26A11        | Solute Carrier Family 26, Member 11                                                                        | -3.51 | 0.77 |
| FKSG30          | Actin-Like Protein                                                                                         | -3.51 | 0.80 |
| GAA             | Glucosidase, Alpha; Acid (Pompe Disease, Glycogen Storage Disease Type Ii)                                 | -3.51 | 0.78 |
| CRYL1           | Crystallin, Lambda 1                                                                                       | -3.51 | 0.87 |
| A_24_P255303    | -                                                                                                          | -3.50 | 0.88 |
| THC2314600      | -                                                                                                          | -3.49 | 0.88 |
| RTN4RL1         | Reticulon 4 Receptor-Like 1                                                                                | -3.49 | 0.84 |
| FCER1G          | Fc Fragment Of Ige, High Affinity I, Receptor For; Gamma Polypeptide                                       | -3.48 | 0.78 |
| SCRN1           | Secernin 1                                                                                                 | -3.47 | 0.81 |
| PERP            | Perp, Tp53 Apoptosis Effector                                                                              | -3.46 | 0.85 |
| GSTO1           | Glutathione S-Transferase Omega 1                                                                          | -3.46 | 0.81 |
| CSDE1           | Cold Shock Domain Containing E1, Rna-Binding                                                               | -3.44 | 0.87 |
| MAN2B1          | Mannosidase, Alpha, Class 2b, Member 1                                                                     | -3.44 | 0.85 |
| HLA-DPB1        | Major Histocompatibility Complex, Class Ii, Dp Beta 1                                                      | -3.43 | 0.86 |
| PSAP            | Prosaposin (Variant Gaucher Disease And Variant Metachromatic Leukodystrophy)                              | -3.42 | 0.82 |
| ENST00000303246 | -                                                                                                          | -3.42 | 0.86 |
| TXN             | Thioredoxin                                                                                                | -3.42 | 0.83 |
| A_32_P113533    | -                                                                                                          | -3.42 | 0.81 |
| GALC            | Galactosylceramidase                                                                                       | -3.41 | 0.85 |
| SLC39A8         | Solute Carrier Family 39 (Zinc Transporter), Member 8                                                      | -3.41 | 0.80 |
| C22orf9         | Chromosome 22 Open Reading Frame 9                                                                         | -3.40 | 0.79 |
| NFYB            | Nuclear Transcription Factor Y, Beta                                                                       | -3.40 | 0.90 |
| PRKRIR          | Protein-Kinase, Interferon-Inducible Double Stranded Rna Dependent Inhibitor, Repressor Of (P58 Repressor) | -3.39 | 0.87 |
| CREBL2          | Camp Responsive Element Binding Protein-Like 2                                                             | -3.39 | 0.86 |
| COLEC11         | Collectin Sub-Family Member 11                                                                             | -3.37 | 0.81 |
| A_24_P255786    | -                                                                                                          | -3.37 | 0.81 |
| THBS1           | Thrombospondin 1                                                                                           | -3.37 | 0.69 |
| RBBP8           | Retinoblastoma Binding Protein 8                                                                           | -3.37 | 0.87 |
| NFKBIE          | Nuclear Factor Of Kappa Light Polypeptide Gene Enhancer In B-Cells Inhibitor, Epsilon                      | -3.36 | 0.85 |
| DNAJB6          | Dnaj (Hsp40) Homolog, Subfamily B, Member 6                                                                | -3.36 | 0.91 |
| ENST00000327665 | -                                                                                                          | -3.35 | 0.85 |

|                 |                                                                    |       |      |
|-----------------|--------------------------------------------------------------------|-------|------|
| TNFRSF12A       | Tumor Necrosis Factor Receptor Superfamily, Member 12a             | -3.35 | 0.61 |
| LOC147158       | Lectin, Galactoside-Binding, Soluble, 9 (Galectin 9)<br>Pseudogene | -3.35 | 0.85 |
| A_24_P49800     | -                                                                  | -3.34 | 0.80 |
| FCGBP           | Fc Fragment Of Igg Binding Protein                                 | -3.34 | 0.54 |
| ITIH5           | Inter-Alpha (Globulin) Inhibitor H5                                | -3.34 | 0.79 |
| UBL3            | Ubiquitin-Like 3                                                   | -3.33 | 0.87 |
| NFYB            | Nuclear Transcription Factor Y, Beta                               | -3.33 | 0.89 |
| MT1L            | Metallothionein 1l                                                 | -3.33 | 0.85 |
| ENST00000303830 | -                                                                  | -3.32 | 0.81 |
| PRG1            | Proteoglycan 1, Secretory Granule                                  | -3.32 | 0.88 |
| -               | Cd14 Antigen                                                       | -3.32 | 0.76 |
| THBS1           | Thrombospondin 1                                                   | -3.32 | 0.74 |
| DNAJA5          | Dnaj Homology Subfamily A Member 5                                 | -3.31 | 0.89 |
| EDN1            | Endothelin 1                                                       | -3.31 | 0.77 |
| ENST00000354530 | -                                                                  | -3.30 | 0.82 |
| A_24_P161393    | -                                                                  | -3.30 | 0.81 |
| WDR1            | Wd Repeat Domain 1                                                 | -3.30 | 0.86 |
| CKLFSF7         | -                                                                  | -3.30 | 0.79 |
| SERTAD4         | Serta Domain Containing 4                                          | -3.29 | 0.87 |
| KIAA0251        | Kiaa0251 Protein                                                   | -3.29 | 0.90 |
| ARHGAP22        | Rho Gtpase Activating Protein 22                                   | -3.28 | 0.85 |
| TGOLN2          | Trans-Golgi Network Protein 2                                      | -3.28 | 0.87 |
| AK024680        | -                                                                  | -3.27 | 0.78 |
| PSCD4           | Pleckstrin Homology, Sec7 And Coiled-Coil Domains 4                | -3.27 | 0.80 |
| CCRL2           | Chemokine (C-C Motif) Receptor-Like 2                              | -3.26 | 0.84 |
| AK126405        | -                                                                  | -3.25 | 0.79 |
| CSDE1           | Cold Shock Domain Containing E1, Rna-Binding                       | -3.25 | 0.87 |
| ACTC            | Actin, Alpha, Cardiac Muscle                                       | -3.25 | 0.82 |
| C6orf192        | Chromosome 6 Open Reading Frame 192                                | -3.25 | 0.80 |
| TPM4            | Tropomyosin 4                                                      | -3.25 | 0.79 |
| LY96            | Lymphocyte Antigen 96                                              | -3.25 | 0.80 |
| PLEK            | Pleckstrin                                                         | -3.24 | 0.79 |
| A_24_P850172    | -                                                                  | -3.24 | 0.84 |
| APLP2           | Amyloid Beta (A4) Precursor-Like Protein 2                         | -3.24 | 0.83 |
| HLA-DPB1        | Major Histocompatibility Complex, Class Ii, Dp Beta 1              | -3.24 | 0.85 |
| STMN1           | Stathmin 1/Oncoprotein 18                                          | -3.23 | 0.73 |
| FOLR2           | Folate Receptor 2 (Fetal)                                          | -3.23 | 0.74 |
| AK128714        | -                                                                  | -3.22 | 0.84 |
| MT1A            | Metallothionein 1a (Functional)                                    | -3.22 | 0.88 |
| A_24_P306614    | -                                                                  | -3.22 | 0.84 |
| FLJ22662        | Hypothetical Protein Flj22662                                      | -3.21 | 0.84 |
| MT2A            | Metallothionein 2a                                                 | -3.20 | 0.83 |
| MGC54289        | -                                                                  | -3.19 | 0.87 |



|                 |                                                                 |       |      |
|-----------------|-----------------------------------------------------------------|-------|------|
| ENST00000355670 | -                                                               | -3.19 | 0.81 |
| LASS2           | Lag1 Longevity Assurance Homolog 2 (S. Cerevisiae)              | -3.19 | 0.89 |
| MRC1L1          | Mannose Receptor, C Type 1-Like 1                               | -3.19 | 0.75 |
| TRAM1           | Translocation Associated Membrane Protein 1                     | -3.19 | 0.90 |
| A_24_P187626    | -                                                               | -3.19 | 0.80 |
| GP9             | Glycoprotein Ix (Platelet)                                      | -3.18 | 0.89 |
| FTHL7           | Ferritin, Heavy Polypeptide-Like 7                              | -3.18 | 0.84 |
| VAV1            | Vav 1 Oncogene                                                  | -3.18 | 0.85 |
| RBPSUH          | Recombining Binding Protein Suppressor Of Hairless (Drosophila) | -3.17 | 0.88 |
| C1QA            | Complement Component 1, Q Subcomponent, A Chain                 | -3.17 | 0.72 |
| A_24_P753760    | -                                                               | -3.17 | 0.84 |
| ACTR3           | Arp3 Actin-Related Protein 3 Homolog (Yeast)                    | -3.16 | 0.87 |
| C1QB            | Complement Component 1, Q Subcomponent, B Chain                 | -3.15 | 0.70 |
| BAG3            | Bcl2-Associated Athanogene 3                                    | -3.15 | 0.85 |
| ITGB1BP1        | Integrin Beta 1 Binding Protein 1                               | -3.14 | 0.84 |
| ARRDC4          | Arrestin Domain Containing 4                                    | -3.13 | 0.85 |
| LY86            | Lymphocyte Antigen 86                                           | -3.13 | 0.78 |
| RAB7B           | Hypothetical Protein Mgc16212                                   | -3.13 | 0.80 |
| CFHL1           | Complement factor H-related 1                                   | -3.13 | 0.82 |
| MERTK           | C-Mer Proto-Oncogene Tyrosine Kinase                            | -3.12 | 0.79 |
| pp9099          | -                                                               | -3.12 | 0.83 |
| ZMYND15         | Zinc Finger, Mynd-Type Containing 15                            | -3.11 | 0.81 |
| COLEC11         | Collectin Sub-Family Member 11                                  | -3.11 | 0.77 |
| AKR1B1          | Aldo-Keto Reductase Family 1, Member B1 (Aldose Reductase)      | -3.11 | 0.87 |
| IER5            | Immediate Early Response 5                                      | -3.10 | 0.85 |
| C1orf149        | Chromosome 1 Open Reading Frame 149                             | -3.09 | 0.90 |
| A_24_P58647     | -                                                               | -3.09 | 0.88 |
| RAB31           | Rab31, Member Ras Oncogene Family                               | -3.09 | 0.82 |
| SDC4            | Syndecan 4 (Amphiglycan, Ryudocan)                              | -3.08 | 0.88 |
| C7              | Complement Component 7                                          | -3.07 | 0.83 |
| SRPX2           | Sushi-Repeat-Containing Protein, X-Linked 2                     | -3.07 | 0.73 |
| PTPNS1          | Protein Tyrosine Phosphatase, Non-Receptor Type Substrate 1     | -3.06 | 0.84 |
| -               | Extracellular Link Domain Containing 1                          | -3.06 | 0.75 |
| GMIP            | Gem Interacting Protein                                         | -3.05 | 0.88 |
| SNX10           | Sorting Nexin 10                                                | -3.05 | 0.81 |
| TDRD7           | Tudor Domain Containing 7                                       | -3.05 | 0.91 |
| C21orf25        | Chromosome 21 Open Reading Frame 25                             | -3.04 | 0.85 |
| EPB41L4B        | Erythrocyte Membrane Protein Band 4.1 Like 4b                   | -3.04 | 0.80 |
| A_24_P383901    | -                                                               | -3.03 | 0.83 |
| SCARB2          | Scavenger Receptor Class B, Member 2                            | -3.02 | 0.87 |
| MT1G            | Metallothionein 1g                                              | -3.01 | 0.84 |
| IL10RA          | Interleukin 10 Receptor, Alpha                                  | -3.00 | 0.81 |

|                 |                                                                                              |       |      |
|-----------------|----------------------------------------------------------------------------------------------|-------|------|
| FCHO2           | Fch Domain Only 2                                                                            | -3.00 | 0.90 |
| MT1H            | Metallothionein 1h                                                                           | -3.00 | 0.87 |
| BDKRB2          | Bradykinin Receptor B2                                                                       | -2.99 | 0.85 |
| PLEKHA1         | Pleckstrin Homology Domain Containing, Family A (Phosphoinositide Binding Specific) Member 1 | -2.98 | 0.89 |
| IQGAP2          | Iq Motif Containing Gtpase Activating Protein 2                                              | -2.97 | 0.81 |
| ACSL4           | Acyl-Coa Synthetase Long-Chain Family Member 4                                               | -2.97 | 0.92 |
| CKLFSF3         | CKLF-like MARVEL transmembrane domain containing 3                                           | -2.97 | 0.80 |
| BMP6            | Bone Morphogenetic Protein 6                                                                 | -2.97 | 0.84 |
| TPM4            | Tropomyosin 4                                                                                | -2.96 | 0.80 |
| PYCARD          | Pyd And Card Domain Containing                                                               | -2.96 | 0.83 |
| AQP3            | Aquaporin 3 (Gill Blood Group)                                                               | -2.96 | 0.82 |
| GALNACT-2       | Chondroitin Sulfate Galnact-2                                                                | -2.96 | 0.89 |
| LYPLA3          | Lysophospholipase 3 (Lysosomal Phospholipase A2)                                             | -2.96 | 0.88 |
| BC030112        | -                                                                                            | -2.95 | 0.90 |
| ADAM9           | Adam Metallopeptidase Domain 9 (Meltrin Gamma)                                               | -2.95 | 0.77 |
| BRI3            | Brain Protein I3                                                                             | -2.95 | 0.87 |
| RHEB            | Ras Homolog Enriched In Brain                                                                | -2.94 | 0.86 |
| ITIH5           | Inter-Alpha (Globulin) Inhibitor H5                                                          | -2.94 | 0.77 |
| S100A10         | S100 Calcium Binding Protein A10 (Annexin Ii Ligand, Calpactin I, Light Polypeptide (P11))   | -2.94 | 0.76 |
| MCL1            | Myeloid Cell Leukemia Sequence 1 (Bcl2-Related)                                              | -2.94 | 0.87 |
| PPT1            | Palmitoyl-Protein Thioesterase 1 (Ceroid-Lipofuscinosis, Neuronal 1, Infantile)              | -2.94 | 0.79 |
| C22orf9         | Chromosome 22 Open Reading Frame 9                                                           | -2.93 | 0.84 |
| TPM3            | Tropomyosin 3                                                                                | -2.93 | 0.88 |
| SLITL2          | Slit-Like 2 (Drosophila)                                                                     | -2.93 | 0.80 |
| C2              | Complement Component 2                                                                       | -2.93 | 0.77 |
| ARPC1B          | Actin Related Protein 2/3 Complex, Subunit 1b, 41kda                                         | -2.92 | 0.84 |
| STCH            | Stress 70 Protein Chaperone, Microsome-Associated, 60kda                                     | -2.92 | 0.88 |
| ENST00000245185 | -                                                                                            | -2.91 | 0.84 |
| SH3BGL3         | Sh3 Domain Binding Glutamic Acid-Rich Protein Like 3                                         | -2.91 | 0.83 |
| CTSZ            | Cathepsin Z                                                                                  | -2.91 | 0.79 |
| SCUBE2          | Signal Peptide, Cub Domain, Egf-Like 2                                                       | -2.91 | 0.85 |
| FEZ1            | Fasciculation And Elongation Protein Zeta 1 (Zygin I)                                        | -2.90 | 0.89 |
| TUBA6           | Tubulin, Alpha, Ubiquitous                                                                   | -2.90 | 0.85 |
| MR1             | Major Histocompatibility Complex, Class I-Related                                            | -2.90 | 0.89 |
| CYP1B1          | Cytochrome P450, Family 1, Subfamily B, Polypeptide 1                                        | -2.90 | 0.77 |
| LEPR            | Leptin Receptor                                                                              | -2.89 | 0.84 |
| EPB41L2         | Erythrocyte Membrane Protein Band 4.1-Like 2                                                 | -2.88 | 0.88 |
| CKLFSF6         | -                                                                                            | -2.88 | 0.89 |
| COMMD8          | Comm Domain Containing 8                                                                     | -2.88 | 0.90 |
| FDX1            | Ferredoxin 1                                                                                 | -2.88 | 0.87 |
| PLA2G4C         | Phospholipase A2, Group Ivc (Cytosolic, Calcium-Independent)                                 | -2.88 | 0.88 |
| HPRT1           | Hypoxanthine Phosphoribosyltransferase 1 (Lesch-Nyhan                                        | -2.87 | 0.85 |

|                 |                                                                     |       |      |
|-----------------|---------------------------------------------------------------------|-------|------|
|                 | Syndrome)                                                           |       |      |
| MAN2B2          | Mannosidase, Alpha, Class 2b, Member 2                              | -2.87 | 0.90 |
| A_24_P247175    | -                                                                   | -2.87 | 0.85 |
| VAT1            | Vesicle Amine Transport Protein 1 Homolog (T Californica)           | -2.87 | 0.83 |
| ACTB            | Actin, Beta                                                         | -2.86 | 0.81 |
| GTDC1           | Pro0159 Protein                                                     | -2.85 | 0.86 |
| MAN2B1          | Mannosidase, Alpha, Class 2b, Member 1                              | -2.85 | 0.81 |
| BE926212        | -                                                                   | -2.85 | 0.90 |
| TPM4            | Tropomyosin 4                                                       | -2.84 | 0.80 |
| IL15            | Interleukin 15                                                      | -2.83 | 0.93 |
| MTR             | 5-Methyltetrahydrofolate-Homocysteine Methyltransferase             | -2.83 | 0.89 |
| WASPIP          | Wiskott-Aldrich Syndrome Protein Interacting Protein                | -2.83 | 0.87 |
| SLA             | Src-Like-Adaptor                                                    | -2.83 | 0.78 |
| A_24_P110591    | -                                                                   | -2.83 | 0.90 |
| HTRA3           | Htra Serine Peptidase 3                                             | -2.83 | 0.67 |
| C16orf45        | Chromosome 16 Open Reading Frame 45                                 | -2.82 | 0.92 |
| TMED9           | Transmembrane Emp24 Protein Transport Domain<br>Containing 9        | -2.81 | 0.89 |
| CIDEA           | Cell Death-Inducing Dffa-Like Effector A                            | -2.81 | 0.82 |
| RSNL2           | Restin-Like 2                                                       | -2.81 | 0.85 |
| MT1X            | Metallothionein 1x                                                  | -2.81 | 0.87 |
| SPFH1           | Spfh Domain Family, Member 1                                        | -2.81 | 0.90 |
| CMPK            | Cytidylate Kinase                                                   | -2.79 | 0.88 |
| KIAA1212        | Hypothetical Protein Loc55580                                       | -2.79 | 0.78 |
| MT1K            | metallothionein 1M                                                  | -2.78 | 0.87 |
| FHL1            | Four And A Half Lim Domains 1                                       | -2.78 | 0.69 |
| CKIP-1          | Pleckstrin homology domain containing, family O member 1            | -2.77 | 0.80 |
| CYBRD1          | Cytochrome B Reductase 1                                            | -2.77 | 0.85 |
| CR620010        | -                                                                   | -2.77 | 0.86 |
| IMMP2L          | Imp2 Inner Mitochondrial Membrane Peptidase-Like (S.<br>Cerevisiae) | -2.77 | 0.92 |
| CCL2            | Chemokine (C-C Motif) Ligand 2                                      | -2.77 | 0.71 |
| MAP2K3          | Mitogen-Activated Protein Kinase Kinase 3                           | -2.77 | 0.88 |
| RHOQ            | Ras Homolog Gene Family, Member Q                                   | -2.76 | 0.82 |
| CREG1           | Cellular Repressor Of E1a-Stimulated Genes 1                        | -2.75 | 0.87 |
| KIAA0433        | -                                                                   | -2.74 | 0.91 |
| HLA-DRB5        | Major Histocompatibility Complex, Class Ii, Dr Beta 1               | -2.74 | 0.86 |
| HLA-DMA         | Major Histocompatibility Complex, Class Ii, Dm Alpha                | -2.73 | 0.88 |
| AMPD3           | Adenosine Monophosphate Deaminase (Isoform E)                       | -2.73 | 0.82 |
| LAMP1           | Lysosomal-Associated Membrane Protein 1                             | -2.73 | 0.88 |
| RPS6KA1         | Ribosomal Protein S6 Kinase, 90kda, Polypeptide 1                   | -2.73 | 0.82 |
| BU732811        | -                                                                   | -2.73 | 0.90 |
| AL833309        | -                                                                   | -2.73 | 0.78 |
| ENST00000303830 | -                                                                   | -2.72 | 0.86 |
| CAP1            | Cap, Adenylate Cyclase-Associated Protein 1 (Yeast)                 | -2.72 | 0.87 |

|                 |                                                                                                      |       |      |
|-----------------|------------------------------------------------------------------------------------------------------|-------|------|
| ITIH5           | Inter-Alpha (Globulin) Inhibitor H5                                                                  | -2.72 | 0.84 |
| PPGB            | Protective Protein For Beta-Galactosidase (Galactosialidosis)                                        | -2.72 | 0.91 |
| MAFG            | V-Maf Musculoaponeurotic Fibrosarcoma Oncogene Homolog G (Avian)                                     | -2.72 | 0.87 |
| FLJ22457        | -                                                                                                    | -2.72 | 0.89 |
| TPT1            | Tumor Protein, Translationally-Controlled 1                                                          | -2.72 | 0.93 |
| CPEB4           | Cytoplasmic Polyadenylation Element Binding Protein 4                                                | -2.71 | 0.87 |
| KIAA1212        | Hypothetical Protein Loc55580                                                                        | -2.71 | 0.80 |
| A_32_P101860    | -                                                                                                    | -2.70 | 0.88 |
| ARPC5           | Actin Related Protein 2/3 Complex, Subunit 5, 16kda                                                  | -2.70 | 0.86 |
| THC2317110      | -                                                                                                    | -2.70 | 0.88 |
| C1QG            | Complement component 1, q subcomponent, C chain                                                      | -2.70 | 0.77 |
| WDR1            | Wd Repeat Domain 1                                                                                   | -2.70 | 0.90 |
| FOLR2           | Folate Receptor 2 (Fetal)                                                                            | -2.70 | 0.81 |
| CASP7           | Caspase 7, Apoptosis-Related Cysteine Peptidase                                                      | -2.69 | 0.92 |
| RRAS2           | Related Ras Viral (R-Ras) Oncogene Homolog 2                                                         | -2.69 | 0.77 |
| CD33            | Cd33 Antigen (Gp67)                                                                                  | -2.69 | 0.83 |
| HLA-DMA         | Major Histocompatibility Complex, Class Ii, Dm Alpha                                                 | -2.69 | 0.83 |
| MYD88           | Myeloid Differentiation Primary Response Gene (88)                                                   | -2.68 | 0.83 |
| A_32_P157671    | -                                                                                                    | -2.68 | 0.85 |
| LOC93081        | -                                                                                                    | -2.67 | 0.90 |
| PRDX1           | Peroxiredoxin 1                                                                                      | -2.67 | 0.87 |
| ENST00000332444 | -                                                                                                    | -2.67 | 0.89 |
| SLC25A24        | Solute Carrier Family 25 (Mitochondrial Carrier; Phosphate Carrier), Member 24                       | -2.66 | 0.89 |
| CASC4           | Cancer Susceptibility Candidate 4                                                                    | -2.66 | 0.90 |
| COL8A2          | Collagen, Type Viii, Alpha 2                                                                         | -2.66 | 0.87 |
| TMEM16C         | Transmembrane Protein 16c                                                                            | -2.66 | 0.83 |
| MAN2B2          | Mannosidase, Alpha, Class 2b, Member 2                                                               | -2.65 | 0.89 |
| C18orf10        | Chromosome 18 Open Reading Frame 10                                                                  | -2.64 | 0.86 |
| RALBP1          | Rala Binding Protein 1                                                                               | -2.63 | 0.88 |
| PCBP1           | Poly(Rc) Binding Protein 1                                                                           | -2.62 | 0.89 |
| TRIM47          | Tripartite Motif-Containing 47                                                                       | -2.62 | 0.90 |
| ESRRBL1         | Intraflagellar transport 57 homolog (Chlamydomonas)                                                  | -2.61 | 0.93 |
| S100A4          | S100 Calcium Binding Protein A4 (Calcium Protein, Calvasculin, Metastasin, Murine Placental Homolog) | -2.60 | 0.80 |
| SEMA3B          | Sema Domain, Immunoglobulin Domain (Ig), Short Basic Domain, Secreted, (Semaphorin) 3b               | -2.60 | 0.85 |
| KIAA1212        | Hypothetical Protein Loc55580                                                                        | -2.60 | 0.79 |
| C21orf18        | -                                                                                                    | -2.60 | 0.92 |
| TAGLN           | Transgelin                                                                                           | -2.59 | 0.82 |
| EXT1            | Exostoses (Multiple) 1                                                                               | -2.59 | 0.90 |
| TPM3            | Tropomyosin 3                                                                                        | -2.58 | 0.88 |
| A_24_P409750    | -                                                                                                    | -2.58 | 0.90 |
| SEMA3B          | Sema Domain, Immunoglobulin Domain (Ig), Short Basic Domain, Secreted, (Semaphorin) 3b               | -2.58 | 0.84 |

|                 |                                                                                |       |      |
|-----------------|--------------------------------------------------------------------------------|-------|------|
| PPRC1           | Peroxisome Proliferative Activated Receptor, Gamma,<br>Coactivator-Related 1   | -2.58 | 0.88 |
| ENST00000238256 | -                                                                              | -2.57 | 0.89 |
| A_24_P578445    | -                                                                              | -2.57 | 0.88 |
| A_24_P835388    | -                                                                              | -2.57 | 0.84 |
| MAT2A           | Methionine Adenosyltransferase Ii, Alpha                                       | -2.57 | 0.85 |
| SLC24A6         | Solute Carrier Family 24 (Sodium/Potassium/Calcium<br>Exchanger), Member 6     | -2.56 | 0.87 |
| ENST00000354185 | -                                                                              | -2.56 | 0.89 |
| PCGF4           | Polycomb Group Ring Finger 4                                                   | -2.55 | 0.90 |
| DDX48           | Dead (Asp-Glu-Ala-Asp) Box Polypeptide 48                                      | -2.54 | 0.90 |
| RHOQ            | Ras Homolog Gene Family, Member Q                                              | -2.54 | 0.84 |
| TPK1            | Thiamin Pyrophosphokinase 1                                                    | -2.54 | 0.90 |
| HSPH1           | Heat Shock 105kda/110kda Protein 1                                             | -2.54 | 0.84 |
| DAB2            | Disabled Homolog 2, Mitogen-Responsive Phosphoprotein<br>(Drosophila)          | -2.54 | 0.84 |
| MGAT3           | Mannosyl (Beta-1,4-)-Glycoprotein Beta-1,4-N-<br>Acetylglucosaminyltransferase | -2.53 | 0.88 |
| ACTR3           | Arp3 Actin-Related Protein 3 Homolog (Yeast)                                   | -2.51 | 0.88 |
| MASA            | E-1 Enzyme                                                                     | -2.51 | 0.90 |
| TUBA6           | Tubulin, Alpha, Ubiquitous                                                     | -2.51 | 0.85 |
| C18orf37        | Chromosome 18 Open Reading Frame 37                                            | -2.50 | 0.92 |
| TTRAP           | Traf And Tnf Receptor Associated Protein                                       | -2.50 | 0.90 |
| C18orf10        | Chromosome 18 Open Reading Frame 10                                            | -2.50 | 0.86 |
| ATP6AP2         | Atpase, H+ Transporting, Lysosomal Accessory Protein 2                         | -2.50 | 0.87 |
| HS6ST1          | Heparan Sulfate 6-O-Sulfotransferase 1                                         | -2.50 | 0.89 |
| NFE2L1          | Nuclear Factor (Erythroid-Derived 2)-Like 1                                    | -2.49 | 0.89 |
| PORIMIN         | Transmembrane protein 123                                                      | -2.49 | 0.89 |
| A_24_P110601    | -                                                                              | -2.49 | 0.84 |
| TPM3            | Tropomyosin 3                                                                  | -2.49 | 0.91 |
| C2              | Complement Component 2                                                         | -2.48 | 0.84 |
| KIAA1212        | Hypothetical Protein Loc55580                                                  | -2.48 | 0.86 |
| CN272797        | -                                                                              | -2.48 | 0.88 |
| A_24_P230457    | -                                                                              | -2.47 | 0.91 |
| CYP26B1         | Cytochrome P450, Family 26, Subfamily B, Polypeptide 1                         | -2.47 | 0.80 |
| EIF5B           | Eukaryotic Translation Initiation Factor 5b                                    | -2.47 | 0.93 |
| BACH1           | Btb And Cnc Homology 1, Basic Leucine Zipper<br>Transcription Factor 1         | -2.47 | 0.92 |
| MAF             | V-Maf Musculoaponeurotic Fibrosarcoma Oncogene<br>Homolog (Avian)              | -2.47 | 0.86 |
| PIR             | Pirin (Iron-Binding Nuclear Protein)                                           | -2.47 | 0.89 |
| AL117621        | -                                                                              | -2.47 | 0.91 |
| A_23_P57836     | -                                                                              | -2.47 | 0.87 |
| MDS025          | Hypothetical Protein Mds025                                                    | -2.46 | 0.92 |
| TPM3            | Tropomyosin 3                                                                  | -2.46 | 0.87 |
| MAN2A2          | Mannosidase, Alpha, Class 2a, Member 2                                         | -2.46 | 0.87 |

|               |                                                                              |       |      |
|---------------|------------------------------------------------------------------------------|-------|------|
| GADD45A       | Growth Arrest And Dna-Damage-Inducible, Alpha                                | -2.46 | 0.86 |
| NAGK          | N-Acetylglucosamine Kinase                                                   | -2.46 | 0.88 |
| KIAA1212      | Hypothetical Protein Loc55580                                                | -2.46 | 0.79 |
| THC2365247    | -                                                                            | -2.45 | 0.86 |
| SYNPO2        | Synaptopodin 2                                                               | -2.45 | 0.82 |
| KIAA1212      | Hypothetical Protein Loc55580                                                | -2.45 | 0.80 |
| KIAA1212      | Hypothetical Protein Loc55580                                                | -2.45 | 0.84 |
| TPM3          | Tropomyosin 3                                                                | -2.45 | 0.87 |
| FLJ11259      | Hypothetical Protein Flj11259                                                | -2.45 | 0.88 |
| FLJ21908      | Hypothetical Protein Flj21908                                                | -2.44 | 0.91 |
| MT1H          | Metallothionein 1h                                                           | -2.44 | 0.88 |
| CLIC1         | Chloride Intracellular Channel 1                                             | -2.44 | 0.89 |
| APLP2         | Amyloid Beta (A4) Precursor-Like Protein 2                                   | -2.44 | 0.83 |
| MAN2A2        | Mannosidase, Alpha, Class 2a, Member 2                                       | -2.43 | 0.86 |
| A_32_P100338  | -                                                                            | -2.42 | 0.90 |
| RAB20         | Rab20, Member Ras Oncogene Family                                            | -2.42 | 0.89 |
| SREBF2        | Sterol Regulatory Element Binding Transcription Factor 2                     | -2.41 | 0.88 |
| MTPN          | Myotrophin                                                                   | -2.41 | 0.91 |
| ATP13A3       | Atpase Type 13a3                                                             | -2.40 | 0.86 |
| ATF4          | Activating Transcription Factor 4 (Tax-Responsive Enhancer Element B67)      | -2.40 | 0.89 |
| HRMT1L1       | Protein arginine methyltransferase 2                                         | -2.40 | 0.92 |
| TMEM32        | Transmembrane Protein 32                                                     | -2.40 | 0.91 |
| CTSC          | Cathepsin C                                                                  | -2.40 | 0.83 |
| WHSC1         | Wolf-Hirschhorn Syndrome Candidate 1                                         | -2.40 | 0.92 |
| CGREF1        | Cell Growth Regulator With Ef-Hand Domain 1                                  | -2.40 | 0.87 |
| CENTA2        | Centaurin, Alpha 2                                                           | -2.40 | 0.79 |
| DKFZP434K1421 | -                                                                            | -2.40 | 0.91 |
| ARHGAP21      | Rho Gtpase Activating Protein 21                                             | -2.39 | 0.88 |
| PTPRE         | Protein Tyrosine Phosphatase, Receptor Type, E                               | -2.39 | 0.85 |
| KIAA1212      | Hypothetical Protein Loc55580                                                | -2.39 | 0.80 |
| AK097266      | -                                                                            | -2.39 | 0.84 |
| ACTR3         | Arp3 Actin-Related Protein 3 Homolog (Yeast)                                 | -2.39 | 0.91 |
| DLC1          | Deleted In Liver Cancer 1                                                    | -2.39 | 0.85 |
| MGAT1         | Mannosyl (Alpha-1,3-)-Glycoprotein Beta-1,2-N-Acetylglucosaminyltransferase  | -2.39 | 0.86 |
| LUM           | Lumican                                                                      | -2.39 | 0.74 |
| DSCR1         | Down Syndrome Critical Region Gene 1                                         | -2.39 | 0.90 |
| TCIRG1        | T-Cell, Immune Regulator 1, Atpase, H+ Transporting, Lysosomal V0 Subunit A3 | -2.39 | 0.82 |
| LYAR          | Hypothetical Protein Flj20425                                                | -2.38 | 0.92 |
| FLJ35696      | -                                                                            | -2.37 | 0.88 |
| TMCO3         | Transmembrane And Coiled-Coil Domains 3                                      | -2.37 | 0.92 |
| HLA-DPB2      | Major Histocompatibility Complex, Class Ii, Dp Beta 2 (Pseudogene)           | -2.37 | 0.90 |
| MEST          | Mesoderm Specific Transcript Homolog (Mouse)                                 | -2.37 | 0.77 |

|                 |                                                                 |       |      |
|-----------------|-----------------------------------------------------------------|-------|------|
| ASPN            | Asporin (Lrr Class 1)                                           | -2.36 | 0.87 |
| TGFB1           | Transforming Growth Factor, Beta-Induced, 68kda                 | -2.36 | 0.81 |
| NSMAF           | Neutral Sphingomyelinase (N-Smase) Activation Associated Factor | -2.36 | 0.91 |
| HLA-DPA1        | Major Histocompatibility Complex, Class Ii, Dp Alpha 1          | -2.35 | 0.88 |
| SLC43A3         | Solute Carrier Family 43, Member 3                              | -2.35 | 0.87 |
| A_24_P273245    | -                                                               | -2.35 | 0.92 |
| DDX18           | Dead (Asp-Glu-Ala-Asp) Box Polypeptide 18                       | -2.35 | 0.92 |
| MAPKAP1         | Mitogen-Activated Protein Kinase Associated Protein 1           | -2.35 | 0.88 |
| TMEM24          | Transmembrane Protein 24                                        | -2.35 | 0.93 |
| MPEG1           | Macrophage Expressed Gene 1                                     | -2.34 | 0.83 |
| DEXI            | Dexamethasone-Induced Transcript                                | -2.34 | 0.93 |
| CB049198        | -                                                               | -2.34 | 0.87 |
| APPBP1          | Amyloid Beta Precursor Protein Binding Protein 1                | -2.34 | 0.94 |
| GNA13           | Guanine Nucleotide Binding Protein (G Protein), Alpha 13        | -2.34 | 0.88 |
| SACS            | Spastic Ataxia Of Charlevoix-Saguenay (Sacsin)                  | -2.34 | 0.93 |
| ENST00000333604 | -                                                               | -2.34 | 0.89 |
| ADRB2           | Adrenergic, Beta-2-, Receptor, Surface                          | -2.33 | 0.88 |
| BAG3            | Bcl2-Associated Athanogene 3                                    | -2.33 | 0.82 |
| ENST00000332097 | -                                                               | -2.33 | 0.88 |
| A_23_P331087    | -                                                               | -2.33 | 0.91 |
| MT1J            | MTB                                                             | -2.32 | 0.90 |
| HABP4           | Hyaluronan Binding Protein 4                                    | -2.31 | 0.88 |
| HLA-DOA         | Major Histocompatibility Complex, Class Ii, Do Alpha            | -2.31 | 0.87 |
| A_24_P349869    | -                                                               | -2.31 | 0.85 |
| THBS2           | Thrombospondin 2                                                | -2.31 | 0.81 |
| ALOX5AP         | Arachidonate 5-Lipoxygenase-Activating Protein                  | -2.31 | 0.86 |
| HCLS1           | Hematopoietic Cell-Specific Lyn Substrate 1                     | -2.30 | 0.88 |
| FNDC4           | Fibronectin Type Iii Domain Containing 4                        | -2.30 | 0.89 |
| NUDT4           | Nudix (Nucleoside Diphosphate Linked Moiety X)-Type Motif 4     | -2.30 | 0.90 |
| FAM3C           | Family With Sequence Similarity 3, Member C                     | -2.30 | 0.87 |
| MBNL2           | Muscleblind-Like 2 (Drosophila)                                 | -2.30 | 0.89 |
| EGR1            | Early Growth Response 1                                         | -2.30 | 0.77 |
| PNRC2           | Proline-Rich Nuclear Receptor Coactivator 2                     | -2.29 | 0.91 |
| GLB1            | Galactosidase, Beta 1                                           | -2.28 | 0.85 |
| FAM14A          | Family With Sequence Similarity 14, Member A                    | -2.28 | 0.90 |
| RND3            | Rho Family Gtpase 3                                             | -2.28 | 0.83 |
| TMEM8           | Transmembrane Protein 8 (Five Membrane-Spanning Domains)        | -2.28 | 0.92 |
| CKLFSF6         | -                                                               | -2.28 | 0.90 |
| ARF6            | Adp-Ribosylation Factor 6                                       | -2.27 | 0.91 |
| DKFZP564J102    | Dkfpz564j102 Protein                                            | -2.27 | 0.90 |
| DIRC2           | Disrupted In Renal Carcinoma 2                                  | -2.27 | 0.91 |
| WDR21A          | Wd Repeat Domain 21a                                            | -2.27 | 0.92 |

|              |                                                                                         |       |      |
|--------------|-----------------------------------------------------------------------------------------|-------|------|
| BC072415     | -                                                                                       | -2.27 | 0.91 |
| UXS1         | Udp-Glucuronate Decarboxylase 1                                                         | -2.27 | 0.90 |
| SH3D19       | Sh3 Domain Protein D19                                                                  | -2.26 | 0.86 |
| RGL1         | Ral Guanine Nucleotide Dissociation Stimulator-Like 1                                   | -2.26 | 0.87 |
| BEXL1        | Brain Expressed X-Linked-Like 1                                                         | -2.26 | 0.92 |
| A_32_P148407 | -                                                                                       | -2.26 | 0.87 |
| FAM3C        | Family With Sequence Similarity 3, Member C                                             | -2.26 | 0.89 |
| COL6A2       | Collagen, Type Vi, Alpha 2                                                              | -2.26 | 0.87 |
| ST3GAL4      | St3 Beta-Galactoside Alpha-2,3-Sialyltransferase 4                                      | -2.25 | 0.88 |
| PDGFC        | Spinal Cord-Derived Growth Factor; Secretory Growth Factor-Like Protein Fallotein       | -2.25 | 0.91 |
| C2orf18      | Chromosome 2 Open Reading Frame 18                                                      | -2.25 | 0.87 |
| A_24_P871726 | -                                                                                       | -2.25 | 0.93 |
| COMTD1       | Catechol-O-Methyltransferase Domain Containing 1                                        | -2.25 | 0.92 |
| YPEL4        | Yippe-Like 4 (Drosophila)                                                               | -2.25 | 0.87 |
| CYBB         | Cytochrome B-245, Beta Polypeptide (Chronic Granulomatous Disease)                      | -2.24 | 0.81 |
| TK1          | Thymidine Kinase 1, Soluble                                                             | -2.24 | 0.77 |
| CHSY1        | Carbohydrate (Chondroitin) Synthase 1                                                   | -2.24 | 0.86 |
| THC2364880   | -                                                                                       | -2.24 | 0.88 |
| LOC400890    | Hypothetical Loc400890                                                                  | -2.24 | 0.88 |
| FBXW4        | F-Box And Wd-40 Domain Protein 4                                                        | -2.24 | 0.91 |
| C14orf10     | Chromosome 14 Open Reading Frame 10                                                     | -2.23 | 0.92 |
| ANXA4        | Annexin A4                                                                              | -2.23 | 0.87 |
| C11orf15     | -                                                                                       | -2.23 | 0.91 |
| DLC1         | Deleted In Liver Cancer 1                                                               | -2.23 | 0.86 |
| SFRP4        | Secreted Frizzled-Related Protein 4                                                     | -2.23 | 0.83 |
| HIF1A        | Hypoxia-Inducible Factor 1, Alpha Subunit (Basic Helix-Loop-Helix Transcription Factor) | -2.23 | 0.91 |
| KIAA1212     | Hypothetical Protein Loc55580                                                           | -2.23 | 0.80 |
| CAMKK2       | Calcium/Calmodulin-Dependent Protein Kinase Kinase 2, Beta                              | -2.23 | 0.90 |
| SNX2         | Sorting Nexin 2                                                                         | -2.23 | 0.91 |
| SOCS3        | Suppressor Of Cytokine Signaling 3                                                      | -2.23 | 0.81 |
| A_23_P347100 | -                                                                                       | -2.23 | 0.90 |
| CAB39        | Calcium Binding Protein 39                                                              | -2.23 | 0.86 |
| AZIN1        | Antizyme Inhibitor 1                                                                    | -2.23 | 0.90 |
| ENPP2        | Ectonucleotide Pyrophosphatase/Phosphodiesterase 2 (Autotaxin)                          | -2.22 | 0.82 |
| CR593492     | -                                                                                       | -2.22 | 0.86 |
| CYP51A1      | Cytochrome P450, Family 51, Subfamily A, Polypeptide 1                                  | -2.22 | 0.87 |
| GPR34        | G Protein-Coupled Receptor 34                                                           | -2.22 | 0.85 |
| TUBA6        | Tubulin, Alpha, Ubiquitous                                                              | -2.21 | 0.88 |
| METTL1       | Methyltransferase Like 1                                                                | -2.21 | 0.90 |
| SLC16A5      | Solute Carrier Family 16 (Monocarboxylic Acid Transporters), Member 5                   | -2.21 | 0.86 |



|                 |                                                                                          |       |      |
|-----------------|------------------------------------------------------------------------------------------|-------|------|
| FZD1            | Frizzled Homolog 1 (Drosophila)                                                          | -2.21 | 0.90 |
| RCN1            | Reticulocalbin 1, Ef-Hand Calcium Binding Domain                                         | -2.21 | 0.89 |
| PCDH9           | Protocadherin 9                                                                          | -2.21 | 0.88 |
| CENTD2          | Centaurin, Delta 2                                                                       | -2.21 | 0.89 |
| M27126          | -                                                                                        | -2.20 | 0.88 |
| WDR44           | Wd Repeat Domain 44                                                                      | -2.20 | 0.94 |
| AK098629        | -                                                                                        | -2.20 | 0.93 |
| BC039246        | -                                                                                        | -2.20 | 0.90 |
| HLA-DQB1        | Major Histocompatibility Complex, Class Ii, Dq Beta 1                                    | -2.19 | 0.89 |
| ENST00000308384 | -                                                                                        | -2.19 | 0.89 |
| LILRB2          | Leukocyte Immunoglobulin-Like Receptor, Subfamily B (With Tm And Itim Domains), Member 2 | -2.19 | 0.85 |
| IQGAP1          | Iq Motif Containing Gtpase Activating Protein 1                                          | -2.19 | 0.88 |
| KIAA0433        | -                                                                                        | -2.18 | 0.91 |
| H2-ALPHA        | Alpha-Tubulin Isotype H2-Alpha                                                           | -2.18 | 0.89 |
| MGC54289        | -                                                                                        | -2.18 | 0.87 |
| LOC493856       | Similar To Riken Cdna 1500009m05 Gene                                                    | -2.18 | 0.90 |
| GALM            | Galactose Mutarotase (Aldose 1-Epimerase)                                                | -2.18 | 0.90 |
| SENP6           | Sumo1/Sentrin Specific Peptidase 6                                                       | -2.18 | 0.93 |
| DDAH1           | Dimethylarginine Dimethylaminohydrolase 1                                                | -2.18 | 0.88 |
| PTGER2          | Prostaglandin E Receptor 2 (Subtype Ep2), 53kda                                          | -2.17 | 0.82 |
| TMEM23          | Transmembrane Protein 23                                                                 | -2.17 | 0.89 |
| ASTN2           | Astrotactin 2                                                                            | -2.17 | 0.90 |
| DNAJA1          | Dnaj (Hsp40) Homolog, Subfamily A, Member 1                                              | -2.17 | 0.91 |
| ARHGEF6         | Rac/Cdc42 Guanine Nucleotide Exchange Factor (Gef) 6                                     | -2.17 | 0.87 |
| KLF6            | Kruppel-Like Factor 6                                                                    | -2.16 | 0.90 |
| THC2372563      | -                                                                                        | -2.16 | 0.86 |
| CBR3            | Carbonyl Reductase 3                                                                     | -2.16 | 0.89 |
| ZNF295          | Zinc Finger Protein 295                                                                  | -2.15 | 0.90 |
| GADD45B         | Growth Arrest And Dna-Damage-Inducible, Beta                                             | -2.15 | 0.89 |
| PCK2            | Phosphoenolpyruvate Carboxykinase 2 (Mitochondrial)                                      | -2.15 | 0.89 |
| TXNDC5          | Thioredoxin Domain Containing 5                                                          | -2.15 | 0.90 |
| ARHGAP10        | Rho Gtpase Activating Protein 10                                                         | -2.15 | 0.91 |
| NIN             | Ninein (Gsk3b Interacting Protein)                                                       | -2.14 | 0.93 |
| SNX10           | Sorting Nexin 10                                                                         | -2.14 | 0.85 |
| DNAJB6          | Dnaj (Hsp40) Homolog, Subfamily B, Member 6                                              | -2.14 | 0.94 |
| RABEP1          | Rabaptin, Rab Gtpase Binding Effector Protein 1                                          | -2.14 | 0.93 |
| MTCH1           | Mitochondrial Carrier Homolog 1 (C. Elegans)                                             | -2.14 | 0.91 |
| SRD5A2L         | Steroid 5 Alpha-Reductase 2-Like                                                         | -2.14 | 0.91 |
| THC2370530      | -                                                                                        | -2.13 | 0.92 |
| SLAMF9          | Slam Family Member 9                                                                     | -2.13 | 0.86 |
| ENST00000163282 | -                                                                                        | -2.12 | 0.92 |
| TLR4            | Toll-Like Receptor 4                                                                     | -2.12 | 0.90 |
| GARS            | Glycyl-Trna Synthetase                                                                   | -2.12 | 0.91 |

|          |                                                                                                              |       |      |
|----------|--------------------------------------------------------------------------------------------------------------|-------|------|
| APH1B    | Anterior Pharynx Defective 1 Homolog B (C. Elegans)                                                          | -2.12 | 0.89 |
| TUBA3    | Tubulin, Alpha 3                                                                                             | -2.12 | 0.88 |
| RNH1     | Ribonuclease/Angiogenin Inhibitor 1                                                                          | -2.11 | 0.89 |
| ANPEP    | Alanyl (Membrane) Aminopeptidase (Aminopeptidase N, Aminopeptidase M, Microsomal Aminopeptidase, Cd13, P150) | -2.11 | 0.91 |
| CDR2     | Cerebellar Degeneration-Related Protein 2, 62kda                                                             | -2.11 | 0.91 |
| CFH      | Complement Factor H                                                                                          | -2.10 | 0.90 |
| FLJ11000 | Hypothetical Protein Flj11000                                                                                | -2.10 | 0.90 |
| PLEKHB2  | Pleckstrin Homology Domain Containing, Family B (Evectins) Member 2                                          | -2.09 | 0.91 |
| HLA-DRA  | Major Histocompatibility Complex, Class Ii, Dr Alpha                                                         | -2.09 | 0.87 |

**Weight Stabilization  
(WS)**

**Up Regulated Genes**

|            |                                                                                 |      |      |
|------------|---------------------------------------------------------------------------------|------|------|
| LOC92162   | -                                                                               | 7.73 | 1.33 |
| TF         | Transferrin                                                                     | 6.98 | 1.85 |
| LGALS12    | Lectin, Galactoside-Binding, Soluble, 12 (Galectin 12)                          | 6.61 | 1.53 |
| FMOD       | Fibromodulin                                                                    | 6.37 | 1.69 |
| AQP1       | Aquaporin 1 (Colton Blood Group)                                                | 5.97 | 1.35 |
| SREBF1     | Sterol Regulatory Element Binding Transcription Factor 1                        | 5.70 | 1.95 |
| SCD        | Stearoyl-Coa Desaturase (Delta-9-Desaturase)                                    | 5.39 | 2.55 |
| IRS1       | Insulin Receptor Substrate 1                                                    | 5.25 | 1.45 |
| ADPN       | Adiponutrin                                                                     | 5.21 | 1.68 |
| ITGA6      | Integrin, Alpha 6                                                               | 5.13 | 1.23 |
| THBS4      | Thrombospondin 4                                                                | 5.03 | 2.25 |
| SLC16A7    | Solute Carrier Family 16 (Monocarboxylic Acid Transporters), Member 7           | 4.99 | 1.37 |
| THC2403797 | -                                                                               | 4.84 | 1.56 |
| SREBF1     | Sterol Regulatory Element Binding Transcription Factor 1                        | 4.79 | 1.50 |
| SHMT1      | Serine Hydroxymethyltransferase 1 (Soluble)                                     | 4.77 | 1.22 |
| GPAM       | Glycerol-3-Phosphate Acyltransferase, Mitochondrial                             | 4.69 | 1.56 |
| LDHD       | Lactate Dehydrogenase D                                                         | 4.67 | 1.42 |
| SNTB2      | Syntrophin, Beta 2 (Dystrophin-Associated Protein A1, 59kda, Basic Component 2) | 4.57 | 1.22 |
| BC000206   | -                                                                               | 4.44 | 1.38 |
| ALDOC      | Aldolase C, Fructose-Bisphosphate                                               | 4.41 | 1.61 |
| CDKN2C     | Cyclin-Dependent Kinase Inhibitor 2c (P18, Inhibits Cdk4)                       | 4.39 | 1.62 |
| CICE       | Cell Death-Inducing Cide-Like Effector Pseudogene                               | 4.30 | 1.33 |
| TNN        | Tenascin N                                                                      | 4.26 | 1.36 |
| FADS2      | Fatty Acid Desaturase 2                                                         | 4.25 | 2.29 |
| CXCL14     | Chemokine (C-X-C Motif) Ligand 14                                               | 4.23 | 1.35 |
| SVEP1      | Sushi, Von Willebrand Factor Type A, Egf And Pentraxin Domain Containing 1      | 4.23 | 1.13 |
| C20orf7    | Chromosome 20 Open Reading Frame 7                                              | 4.21 | 1.70 |
| MGC35097   | -                                                                               | 4.20 | 1.27 |
| PTPLB      | Protein Tyrosine Phosphatase-Like (Proline Instead Of                           | 4.19 | 1.57 |

|            | Catalytic Arginine), Member B                                                           |      |      |
|------------|-----------------------------------------------------------------------------------------|------|------|
| ECHDC1     | Enoyl Coenzyme A Hydratase Domain Containing 1                                          | 4.15 | 1.45 |
| GLUL       | Glutamate-Ammonia Ligase (Glutamine Synthetase)                                         | 4.12 | 1.50 |
| ADRBK2     | Adrenergic, Beta, Receptor Kinase 2                                                     | 4.09 | 1.27 |
| COMP       | Cartilage Oligomeric Matrix Protein                                                     | 4.07 | 1.75 |
| THC2374684 | -                                                                                       | 4.06 | 1.19 |
| CHP        | Calcium Binding Protein P22                                                             | 4.05 | 1.19 |
| CIDEC      | Cell Death-Inducing Dffa-Like Effector C                                                | 4.02 | 1.28 |
| MMP15      | Matrix Metallopeptidase 15 (Membrane-Inserted)                                          | 4.01 | 1.31 |
| PHKA2      | Phosphorylase Kinase, Alpha 2 (Liver)                                                   | 3.99 | 1.14 |
| TUBA8      | Tubulin, Alpha 8                                                                        | 3.98 | 1.35 |
| APBB1IP    | Amyloid Beta (A4) Precursor Protein-Binding, Family B, Member 1 Interacting Protein     | 3.97 | 1.26 |
| FANCE      | Fanconi Anemia, Complementation Group E                                                 | 3.93 | 1.25 |
| GPT        | Glutamic-Pyruvate Transaminase (Alanine Aminotransferase)                               | 3.93 | 1.17 |
| MCF2L      | Mcf.2 Cell Line Derived Transforming Sequence-Like                                      | 3.90 | 1.34 |
| BPHL       | Biphenyl Hydrolase-Like (Serine Hydrolase; Breast Epithelial Mucin-Associated Antigen)  | 3.89 | 1.22 |
| S100B      | S100 Calcium Binding Protein, Beta (Neural)                                             | 3.84 | 1.54 |
| SAA4       | Serum Amyloid A4, Constitutive                                                          | 3.83 | 1.69 |
| CSPG4      | Chondroitin Sulfate Proteoglycan 4 (Melanoma-Associated)                                | 3.80 | 1.16 |
| GJA4       | Gap Junction Protein, Alpha 4, 37kda (Connexin 37)                                      | 3.79 | 1.20 |
| PLVAP      | Plasmalemma Vesicle Associated Protein                                                  | 3.79 | 1.26 |
| SAA4       | Serum Amyloid A4, Constitutive                                                          | 3.79 | 1.61 |
| LRIG1      | Leucine-Rich Repeats And Immunoglobulin-Like Domains 1                                  | 3.78 | 1.28 |
| GLYAT      | Glycine-N-Acyltransferase                                                               | 3.78 | 1.38 |
| SAA4       | Serum Amyloid A4, Constitutive                                                          | 3.78 | 1.68 |
| ELP3       | Elongation Protein 3 Homolog (S. Cerevisiae)                                            | 3.77 | 1.14 |
| EPB41L1    | Erythrocyte Membrane Protein Band 4.1-Like 1                                            | 3.77 | 1.32 |
| BC035751   | -                                                                                       | 3.76 | 1.18 |
| THC2337324 | -                                                                                       | 3.74 | 1.19 |
| OPLAH      | 5-Oxoprolinase (Atp-Hydrolysing)                                                        | 3.73 | 1.20 |
| DCBLD1     | Discoidin, Cub And Lccl Domain Containing 1                                             | 3.72 | 1.19 |
| LAMA5      | Laminin, Alpha 5                                                                        | 3.72 | 1.18 |
| PXMP2      | Peroxisomal Membrane Protein 2, 22kda                                                   | 3.70 | 1.25 |
| SAA4       | Serum Amyloid A4, Constitutive                                                          | 3.70 | 1.54 |
| BCKDHB     | Branched Chain Keto Acid Dehydrogenase E1, Beta Polypeptide (Maple Syrup Urine Disease) | 3.69 | 1.17 |
| ACAS2      | Acyl-CoA synthetase short-chain family member 2                                         | 3.69 | 1.36 |
| GLYAT      | Glycine-N-Acyltransferase                                                               | 3.68 | 1.28 |
| PLEKHG5    | Pleckstrin Homology Domain Containing, Family G (With Rhogef Domain) Member 5           | 3.68 | 1.43 |
| NID2       | Nidogen 2 (Osteonidogen)                                                                | 3.67 | 1.27 |
| MME        | Membrane Metallo-Endopeptidase (Neutral Endopeptidase, Enkephalinase, Calla, Cd10)      | 3.66 | 1.45 |

|                 |                                                                                                                                      |      |      |
|-----------------|--------------------------------------------------------------------------------------------------------------------------------------|------|------|
| SAA4            | Serum Amyloid A4, Constitutive                                                                                                       | 3.63 | 1.65 |
| AACS            | Acetoacetyl-Coa Synthetase                                                                                                           | 3.62 | 1.35 |
| SFRP2           | Secreted Frizzled-Related Protein 2                                                                                                  | 3.62 | 1.37 |
| FLJ37478        | Hypothetical Protein Loc339983                                                                                                       | 3.60 | 1.37 |
| PDHA1           | Pyruvate Dehydrogenase (Lipoamide) Alpha 1                                                                                           | 3.57 | 1.38 |
| AK022629        | -                                                                                                                                    | 3.55 | 1.41 |
| HEYL            | Hairy/Enhancer-Of-Split Related With Yrpw Motif-Like                                                                                 | 3.55 | 1.26 |
| DGAT2           | Diacylglycerol O-Acyltransferase Homolog 2 (Mouse)                                                                                   | 3.52 | 1.63 |
| MOSC2           | Moco Sulphurase C-Terminal Domain Containing 2                                                                                       | 3.52 | 1.18 |
| PDCD8           | Programmed Cell Death 8 (Apoptosis-Inducing Factor)                                                                                  | 3.50 | 1.20 |
| SAA4            | Serum Amyloid A4, Constitutive                                                                                                       | 3.50 | 1.51 |
| AF271776        | -                                                                                                                                    | 3.48 | 1.35 |
| A_32_P133926    | -                                                                                                                                    | 3.47 | 1.35 |
| LOC152831       | -                                                                                                                                    | 3.45 | 1.53 |
| BQ897248        | -                                                                                                                                    | 3.45 | 1.19 |
| UQCRC2          | Ubiquinol-Cytochrome C Reductase Core Protein Ii                                                                                     | 3.45 | 1.15 |
| AR              | Androgen Receptor (Dihydrotestosterone Receptor;<br>Testicular Feminization; Spinal And Bulbar Muscular<br>Atrophy; Kennedy Disease) | 3.43 | 1.30 |
| IGF1            | Insulin-Like Growth Factor 1 (Somatomedin C)                                                                                         | 3.43 | 1.42 |
| MME             | Membrane Metallo-Endopeptidase (Neutral Endopeptidase,<br>Enkephalinase, Calla, Cd10)                                                | 3.43 | 1.36 |
| HSPA12B         | Heat Shock 70kd Protein 12b                                                                                                          | 3.42 | 1.29 |
| ELOVL5          | Elovl Family Member 5, Elongation Of Long Chain Fatty<br>Acids (Fen1/Elo2, Sur4/Elo3-Like, Yeast)                                    | 3.41 | 1.50 |
| PPP1R16A        | Protein Phosphatase 1, Regulatory (Inhibitor) Subunit 16a                                                                            | 3.39 | 1.20 |
| AGT             | Angiotensinogen (Serpine Peptidase Inhibitor, Clade A,<br>Member 8)                                                                  | 3.37 | 1.45 |
| A_32_P128399    | -                                                                                                                                    | 3.36 | 1.24 |
| A_32_P331700    | -                                                                                                                                    | 3.35 | 1.24 |
| THRSP           | Thyroid Hormone Responsive (Spot14 Homolog, Rat)                                                                                     | 3.34 | 1.38 |
| TNS1            | Tensin 1                                                                                                                             | 3.34 | 1.17 |
| RHPN1           | Rhopilin, Rho Gtpase Binding Protein 1                                                                                               | 3.34 | 1.21 |
| DGAT2           | Diacylglycerol O-Acyltransferase Homolog 2 (Mouse)                                                                                   | 3.34 | 1.71 |
| PLK2            | Polo-Like Kinase 2 (Drosophila)                                                                                                      | 3.32 | 1.26 |
| DOCK6           | Dedicator Of Cytokinesis 6                                                                                                           | 3.32 | 1.24 |
| ACSL1           | Fatty-Acid-Coenzyme A Ligase, Long-Chain 1                                                                                           | 3.32 | 1.62 |
| LOC55908        | Hepatocellular Carcinoma-Associated Gene Td26                                                                                        | 3.31 | 1.91 |
| ENST00000308894 | -                                                                                                                                    | 3.31 | 1.27 |
| PRDX2           | Peroxiredoxin 2                                                                                                                      | 3.31 | 1.38 |
| TFPI2           | Tissue Factor Pathway Inhibitor 2                                                                                                    | 3.30 | 1.29 |
| MESP1           | Mesoderm Posterior 1 Homolog (Mouse)                                                                                                 | 3.30 | 1.27 |
| IDH1            | Isocitrate Dehydrogenase 1 (Nadp+), Soluble                                                                                          | 3.30 | 1.26 |
| LOC152831       | -                                                                                                                                    | 3.29 | 1.48 |
| TMEFF2          | Transmembrane Protein With Egf-Like And Two Follistatin-<br>Like Domains 2                                                           | 3.27 | 1.20 |

|                 |                                                                                                      |      |      |
|-----------------|------------------------------------------------------------------------------------------------------|------|------|
| ZAP128          | Acyl-CoA thioesterase 2                                                                              | 3.26 | 1.31 |
| ACAD9           | Acyl-Coenzyme A Dehydrogenase Family, Member 9                                                       | 3.24 | 1.25 |
| KIAA1217        | Kiaa1217                                                                                             | 3.23 | 1.23 |
| THC2373712      | -                                                                                                    | 3.20 | 1.43 |
| SAA4            | Serum Amyloid A4, Constitutive                                                                       | 3.20 | 1.52 |
| ALDH6A1         | Aldehyde Dehydrogenase 6 Family, Member A1                                                           | 3.20 | 1.24 |
| ENST00000333415 | -                                                                                                    | 3.20 | 1.23 |
| BENE            | Mal, T-cell differentiation protein-like                                                             | 3.19 | 1.26 |
| SMARCA2         | Swi/Snf Related, Matrix Associated, Actin Dependent<br>Regulator Of Chromatin, Subfamily A, Member 2 | 3.18 | 1.12 |
| GPT2            | Glutamic Pyruvate Transaminase (Alanine<br>Aminotransferase) 2                                       | 3.16 | 1.34 |
| CKB             | Creatine Kinase, Brain                                                                               | 3.15 | 1.33 |
| ADAMTSL3        | Adamts-Like 3                                                                                        | 3.15 | 1.13 |
| A_24_P50666     | -                                                                                                    | 3.15 | 1.40 |
| MOSC1           | Moco Sulphurase C-Terminal Domain Containing 1                                                       | 3.14 | 1.23 |
| IGF1            | Insulin-Like Growth Factor 1 (Somatomedin C)                                                         | 3.12 | 1.40 |
| AK021744        | -                                                                                                    | 3.12 | 1.22 |
| MYLIP           | Myosin Regulatory Light Chain Interacting Protein                                                    | 3.12 | 1.28 |
| SAA4            | Serum Amyloid A4, Constitutive                                                                       | 3.11 | 1.51 |
| RALA            | V-Ral Simian Leukemia Viral Oncogene Homolog A (Ras<br>Related)                                      | 3.10 | 1.16 |
| ENST00000326261 | -                                                                                                    | 3.10 | 1.14 |
| A_24_P349547    | -                                                                                                    | 3.09 | 1.23 |
| DCI             | Dodecenoyl-Coenzyme A Delta Isomerase (3,2 Trans-Enoyl-<br>Coenzyme A Isomerase)                     | 3.08 | 1.19 |
| YWHAZ           | Tyrosine 3-Monooxygenase/Tryptophan 5-Monooxygenase<br>Activation Protein, Zeta Polypeptide          | 3.04 | 1.14 |
| HSPA2           | Heat Shock 70kda Protein 2                                                                           | 3.04 | 1.20 |
| C9orf58         | Chromosome 9 Open Reading Frame 58                                                                   | 3.03 | 1.18 |
| BC013295        | -                                                                                                    | 3.02 | 1.15 |
| TSPAN3          | Tetraspanin 3                                                                                        | 3.02 | 1.31 |
| GYS1            | Glycogen Synthase 1 (Muscle)                                                                         | 3.01 | 1.31 |
| LOC152831       | -                                                                                                    | 3.01 | 1.36 |
| UQCRH           | Ubiquinol-Cytochrome C Reductase Hinge Protein                                                       | 3.00 | 1.21 |
| AK2             | Adenylate Kinase 2                                                                                   | 3.00 | 1.16 |
| ABCG1           | Atp-Binding Cassette, Sub-Family G (White), Member 1                                                 | 2.99 | 1.32 |
| C8orf34         | Chromosome 8 Open Reading Frame 34                                                                   | 2.99 | 1.37 |
| TSMF            | Ts Translation Elongation Factor, Mitochondrial                                                      | 2.99 | 1.14 |
| EPHX2           | Epoxide Hydrolase 2, Cytoplasmic                                                                     | 2.98 | 1.23 |
| C20orf3         | Chromosome 20 Open Reading Frame 3                                                                   | 2.98 | 1.20 |
| SCD             | Stearoyl-Coa Desaturase (Delta-9-Desaturase)                                                         | 2.97 | 2.11 |
| MCF2L           | Mcf.2 Cell Line Derived Transforming Sequence-Like                                                   | 2.97 | 1.19 |
| ADCY6           | Adenylate Cyclase 6                                                                                  | 2.96 | 1.12 |
| FLJ25530        | Hepatocyte Cell Adhesion Molecule                                                                    | 2.96 | 1.17 |
| AL355688        | -                                                                                                    | 2.96 | 1.25 |

|                 |                                                                                             |      |      |
|-----------------|---------------------------------------------------------------------------------------------|------|------|
| SBLF            | Stonin 1                                                                                    | 2.96 | 1.14 |
| GPC6            | Glypican 6                                                                                  | 2.94 | 1.26 |
| PRDX2           | Peroxiredoxin 2                                                                             | 2.94 | 1.23 |
| AK094885        | -                                                                                           | 2.91 | 1.13 |
| A_24_P272713    | -                                                                                           | 2.90 | 1.32 |
| CLEC14A         | C-Type Lectin Domain Family 14, Member A                                                    | 2.90 | 1.21 |
| FASN            | Fatty Acid Synthase                                                                         | 2.89 | 1.43 |
| FBXO9           | F-Box Protein 9                                                                             | 2.89 | 1.15 |
| IFI27           | Interferon, Alpha-Inducible Protein 27                                                      | 2.89 | 1.18 |
| AK123264        | -                                                                                           | 2.89 | 1.20 |
| FLJ10159        | Hypothetical Protein Flj10159                                                               | 2.89 | 1.15 |
| THC2400529      | -                                                                                           | 2.89 | 1.24 |
| IFI27           | Interferon, Alpha-Inducible Protein 27                                                      | 2.89 | 1.18 |
| ATP5A1          | Atp Synthase, H+ Transporting, Mitochondrial F1 Complex,<br>Alpha Subunit 1, Cardiac Muscle | 2.87 | 1.16 |
| DGAT1           | Diacylglycerol O-Acyltransferase Homolog 1 (Mouse)                                          | 2.87 | 1.19 |
| ETFDH           | Electron-Transferring-Flavoprotein Dehydrogenase                                            | 2.87 | 1.17 |
| MGC4399         | Pnc1 Protein                                                                                | 2.86 | 1.29 |
| BCKDHA          | Branched Chain Keto Acid Dehydrogenase E1, Alpha<br>Polypeptide                             | 2.86 | 1.14 |
| LOC400969       | -                                                                                           | 2.86 | 1.17 |
| PML             | Promyelocytic Leukemia                                                                      | 2.85 | 1.15 |
| MESP1           | Mesoderm Posterior 1 Homolog (Mouse)                                                        | 2.85 | 1.13 |
| ANKS1           | Ankyrin repeat and sterile alpha motif domain containing 1A                                 | 2.85 | 1.19 |
| ANKRD38         | Ankyrin Repeat Domain 38                                                                    | 2.84 | 1.39 |
| GIMAP7          | Gtpase, Imap Family Member 7                                                                | 2.84 | 1.29 |
| ADHFE1          | Alcohol Dehydrogenase, Iron Containing, 1                                                   | 2.84 | 1.23 |
| PODXL           | Podocalyxin-Like                                                                            | 2.84 | 1.34 |
| IFI27           | Interferon, Alpha-Inducible Protein 27                                                      | 2.83 | 1.18 |
| TSPAN18         | Tetraspanin 18                                                                              | 2.83 | 1.20 |
| RALA            | V-Ral Simian Leukemia Viral Oncogene Homolog A (Ras<br>Related)                             | 2.82 | 1.19 |
| ENST00000305820 | -                                                                                           | 2.82 | 1.26 |
| HK2             | Hexokinase 2                                                                                | 2.82 | 1.18 |
| FLJ12057        | -                                                                                           | 2.82 | 1.18 |
| BC036599        | -                                                                                           | 2.80 | 1.13 |
| ENST00000329854 | -                                                                                           | 2.79 | 1.13 |
| CLMN            | Calmin (Calponin-Like, Transmembrane)                                                       | 2.79 | 1.26 |
| ACAS2           | Acyl-CoA synthetase short-chain family member 2                                             | 2.79 | 1.21 |
| FAM43B          | Family With Sequence Similarity 43, Member B                                                | 2.79 | 1.16 |
| MGC40157        | -                                                                                           | 2.78 | 1.22 |
| STOX1           | Storkhead Box 1                                                                             | 2.78 | 1.23 |
| HIG2            | Hypoxia-Inducible Protein 2                                                                 | 2.78 | 1.27 |
| THC2316492      | -                                                                                           | 2.77 | 1.21 |
| RGC32           | Response Gene To Complement 32                                                              | 2.77 | 1.14 |

|            |                                                                                                        |      |      |
|------------|--------------------------------------------------------------------------------------------------------|------|------|
| AK3L1      | Adenylate Kinase 3-Like 1                                                                              | 2.77 | 1.25 |
| GYPC       | Glycophorin C (Gerbich Blood Group)                                                                    | 2.76 | 1.15 |
| AMOT       | Angiomotin                                                                                             | 2.76 | 1.26 |
| AZGP1      | Alpha-2-Glycoprotein 1, Zinc                                                                           | 2.76 | 1.39 |
| FBLN5      | Fibulin 5                                                                                              | 2.76 | 1.17 |
| LRRN6A     | Leucine Rich Repeat Neuronal 6a                                                                        | 2.75 | 1.13 |
| THC2315024 | -                                                                                                      | 2.75 | 1.40 |
| YBX2       | Y Box Binding Protein 2                                                                                | 2.75 | 1.15 |
| A_32_P8653 | -                                                                                                      | 2.75 | 1.21 |
| SERPINF1   | Serpin Peptidase Inhibitor, Clade F (Alpha-2 Antiplasmin, Pigment Epithelium Derived Factor), Member 1 | 2.74 | 1.24 |
| SLC25A1    | Solute Carrier Family 25 (Mitochondrial Carrier; Citrate Transporter), Member 1                        | 2.74 | 1.24 |
| SCN4B      | Sodium Channel, Voltage-Gated, Type Iv, Beta                                                           | 2.74 | 1.26 |
| AK2        | Adenylate Kinase 2                                                                                     | 2.74 | 1.19 |
| FAM13A1    | Family With Sequence Similarity 13, Member A1                                                          | 2.73 | 1.24 |
| AK021980   | -                                                                                                      | 2.71 | 1.21 |
| GRRP1      | Glycine/Arginine Rich Protein 1                                                                        | 2.71 | 1.22 |
| IGSF4      | Immunoglobulin Superfamily, Member 4                                                                   | 2.71 | 1.28 |
| DECR1      | 2,4-Dienoyl Coa Reductase 1, Mitochondrial                                                             | 2.71 | 1.18 |
| COX4I2     | Cytochrome C Oxidase Subunit Iv Isoform 2 (Lung)                                                       | 2.71 | 1.20 |
| HP         | Haptoglobin                                                                                            | 2.70 | 2.70 |
| ORMDL3     | Hypothetical Protein Loc51242                                                                          | 2.70 | 1.16 |
| PTPLB      | Protein Tyrosine Phosphatase-Like (Proline Instead Of Catalytic Arginine), Member B                    | 2.70 | 1.49 |
| PLAT       | Plasminogen Activator, Tissue                                                                          | 2.70 | 1.36 |
| SGCG       | Sarcoglycan, Gamma (35kda Dystrophin-Associated Glycoprotein)                                          | 2.69 | 1.20 |
| NPDC1      | Dkfpz586j0523 Protein                                                                                  | 2.68 | 1.18 |
| ASCIZ      | Atm/Atr-Substrate Chk2-Interacting Zn2+-Finger Protein                                                 | 2.68 | 1.08 |
| AZGP1      | Alpha-2-Glycoprotein 1, Zinc                                                                           | 2.68 | 1.37 |
| FXVD6      | Fxyd Domain Containing Ion Transport Regulator 6                                                       | 2.68 | 1.14 |
| GCSH       | Glycine Cleavage System Protein H (Aminomethyl Carrier)                                                | 2.67 | 1.24 |
| MGC45871   | -                                                                                                      | 2.67 | 1.25 |
| ALDH9A1    | Aldehyde Dehydrogenase 9 Family, Member A1                                                             | 2.67 | 1.25 |
| DTX1       | Deltex Homolog 1 (Drosophila)                                                                          | 2.66 | 1.20 |
| APBB1IP    | Amyloid Beta (A4) Precursor Protein-Binding, Family B, Member 1 Interacting Protein                    | 2.65 | 1.14 |
| TCF4       | Transcription Factor 4                                                                                 | 2.65 | 1.12 |
| PDGFD      | Platelet Derived Growth Factor D                                                                       | 2.65 | 1.22 |
| THC2304000 | -                                                                                                      | 2.65 | 1.28 |
| PECR       | Peroxisomal Trans-2-Enoyl-Coa Reductase                                                                | 2.64 | 1.19 |
| FADS1      | Fatty Acid Desaturase 1                                                                                | 2.64 | 1.59 |
| IFI27      | Interferon, Alpha-Inducible Protein 27                                                                 | 2.64 | 1.16 |
| MYOM1      | Myomesin 1 (Skelemin) 185kda                                                                           | 2.63 | 1.49 |
| PFKFB1     | 6-Phosphofructo-2-Kinase/Fructose-2,6-Biphosphatase 1                                                  | 2.62 | 1.19 |

|                 |                                                                                             |      |      |
|-----------------|---------------------------------------------------------------------------------------------|------|------|
| CLIC5           | Chloride Intracellular Channel 5                                                            | 2.62 | 1.21 |
| WBSCR14         | MLX Interacting Protein-Like (MLXIPL)                                                       | 2.62 | 1.35 |
| DDT             | D-Dopachrome Tautomerase                                                                    | 2.62 | 1.19 |
| A_32_P327750    | -                                                                                           | 2.62 | 1.27 |
| ACVR1C          | Activin A Receptor, Type Ic                                                                 | 2.61 | 1.20 |
| SVIL            | Supervillin                                                                                 | 2.61 | 1.11 |
| SLC9A3R2        | Solute Carrier Family 9 (Sodium/Hydrogen Exchanger),<br>Member 3 Regulator 2                | 2.60 | 1.23 |
| PGM1            | Phosphoglucomutase 1                                                                        | 2.60 | 1.31 |
| SDPR            | Serum Deprivation Response (Phosphatidylserine Binding<br>Protein)                          | 2.60 | 1.19 |
| AK055981        | -                                                                                           | 2.60 | 1.16 |
| AK097322        | -                                                                                           | 2.59 | 1.19 |
| TMEPAI          | Transmembrane, Prostate Androgen Induced Rna                                                | 2.58 | 1.35 |
| FLJ10980        | -                                                                                           | 2.58 | 1.21 |
| MDFI            | Myod Family Inhibitor                                                                       | 2.58 | 1.24 |
| IFI27           | Interferon, Alpha-Inducible Protein 27                                                      | 2.58 | 1.19 |
| BRP44           | Brain Protein 44                                                                            | 2.57 | 1.16 |
| FLJ10980        | -                                                                                           | 2.57 | 1.24 |
| EPB41L1         | Erythrocyte Membrane Protein Band 4.1-Like 1                                                | 2.55 | 1.20 |
| NFIX            | Nuclear Factor I/X (Ccaat-Binding Transcription Factor)                                     | 2.55 | 1.17 |
| GJA12           | Gap Junction Protein, Alpha 12, 47kda                                                       | 2.55 | 1.12 |
| ACOX1           | Acyl-Coenzyme A Oxidase 1, Palmitoyl                                                        | 2.54 | 1.26 |
| YWHAZ           | Tyrosine 3-Monooxygenase/Tryptophan 5-Monooxygenase<br>Activation Protein, Zeta Polypeptide | 2.54 | 1.15 |
| IFI27           | Interferon, Alpha-Inducible Protein 27                                                      | 2.54 | 1.17 |
| ENST00000276898 | -                                                                                           | 2.53 | 1.11 |
| ALDH2           | Aldehyde Dehydrogenase 2 Family (Mitochondrial)                                             | 2.52 | 1.14 |
| C22orf16        | Chromosome 22 Open Reading Frame 16                                                         | 2.52 | 1.28 |
| MSH3            | Muts Homolog 3 (E. Coli)                                                                    | 2.52 | 1.09 |
| IFI27           | Interferon, Alpha-Inducible Protein 27                                                      | 2.52 | 1.16 |
| EMP1            | Epithelial Membrane Protein 1                                                               | 2.51 | 1.18 |
| A_24_P594293    | -                                                                                           | 2.51 | 1.14 |
| HSPC268         | Hypothetical Protein Hspc268                                                                | 2.51 | 1.13 |
| ME1             | Malic Enzyme 1, Nadp(+)-Dependent, Cytosolic                                                | 2.51 | 1.25 |
| IFI27           | Interferon, Alpha-Inducible Protein 27                                                      | 2.50 | 1.18 |
| IFI27           | Interferon, Alpha-Inducible Protein 27                                                      | 2.50 | 1.15 |
| CYCS            | Cytochrome C, Somatic                                                                       | 2.50 | 1.13 |
| SFRP2           | Secreted Frizzled-Related Protein 2                                                         | 2.49 | 1.24 |
| PIK3C2B         | Phosphoinositide-3-Kinase, Class 2, Beta Polypeptide                                        | 2.49 | 1.11 |
| JM11            | Jm11 Protein                                                                                | 2.49 | 1.11 |
| IRX5            | Iroquois Homeobox Protein 5                                                                 | 2.49 | 1.13 |
| ATP10A          | Atpase, Class V, Type 10c                                                                   | 2.48 | 1.16 |
| LOC387911       | Similar To Hypothetical Protein Mgc48915                                                    | 2.48 | 1.24 |
| TKT             | Transketolase (Wernicke-Korsakoff Syndrome)                                                 | 2.47 | 1.16 |



|                                         |                                                                                                      |                                    |      |
|-----------------------------------------|------------------------------------------------------------------------------------------------------|------------------------------------|------|
| C19orf32                                | -                                                                                                    | 2.47                               | 1.32 |
| ADSSL1                                  | Adenylosuccinate Synthase Like 1                                                                     | 2.46                               | 1.36 |
| PPAP2B                                  | Phosphatidic Acid Phosphatase Type 2b                                                                | 2.45                               | 1.15 |
| LPIN1                                   | Lipin 1                                                                                              | 2.43                               | 1.16 |
| NMB                                     | Neuromedin B                                                                                         | 2.43                               | 1.35 |
| FLJ25530                                | Hepatocyte Cell Adhesion Molecule                                                                    | 2.42                               | 1.28 |
| RAI2                                    | Retinoic Acid Induced 2                                                                              | 2.41                               | 1.12 |
| <b><i>Dietary Intervention (DI)</i></b> |                                                                                                      | <b><i>Down Regulated Genes</i></b> |      |
| IGSF21                                  | Immunoglobulin Superfamily, Member 21                                                                | -5.13                              | 0.71 |
| ENST00000307662                         | -                                                                                                    | -4.87                              | 0.79 |
| S100A4                                  | S100 Calcium Binding Protein A4 (Calcium Protein, Calvasculin, Metastasin, Murine Placental Homolog) | -4.77                              | 0.73 |
| TPM4                                    | Tropomyosin 4                                                                                        | -4.69                              | 0.77 |
| LOXL2                                   | Lysyl Oxidase-Like 2                                                                                 | -4.36                              | 0.83 |
| PPT1                                    | Palmitoyl-Protein Thioesterase 1 (Ceroid-Lipofuscinosis, Neuronal 1, Infantile)                      | -4.32                              | 0.80 |
| TFRC                                    | Transferrin Receptor (P90, Cd71)                                                                     | -4.26                              | 0.69 |
| FLJ20533                                | -                                                                                                    | -4.20                              | 0.85 |
| C1orf38                                 | Chromosome 1 Open Reading Frame 38                                                                   | -4.20                              | 0.70 |
| SCARB2                                  | Scavenger Receptor Class B, Member 2                                                                 | -4.19                              | 0.77 |
| LOXL2                                   | Lysyl Oxidase-Like 2                                                                                 | -4.12                              | 0.81 |
| NFKBIE                                  | Nuclear Factor Of Kappa Light Polypeptide Gene Enhancer In B-Cells Inhibitor, Epsilon                | -4.11                              | 0.81 |
| LOXL2                                   | Lysyl Oxidase-Like 2                                                                                 | -4.03                              | 0.82 |
| FTHL17                                  | Ferritin, Heavy Polypeptide-Like 17                                                                  | -4.01                              | 0.82 |
| ASAH1                                   | N-Acylsphingosine Amidohydrolase (Acid Ceramidase) 1                                                 | -4.00                              | 0.71 |
| CRIP1                                   | Cysteine-Rich Protein 1 (Intestinal)                                                                 | -3.96                              | 0.83 |
| A_24_P753760                            | -                                                                                                    | -3.91                              | 0.80 |
| LOXL2                                   | Lysyl Oxidase-Like 2                                                                                 | -3.89                              | 0.83 |
| LOXL2                                   | Lysyl Oxidase-Like 2                                                                                 | -3.87                              | 0.84 |
| PEMT                                    | Phosphatidylethanolamine N-Methyltransferase                                                         | -3.87                              | 0.75 |
| MFSD1                                   | Major Facilitator Superfamily Domain Containing 1                                                    | -3.83                              | 0.80 |
| ENST00000313481                         | -                                                                                                    | -3.81                              | 0.79 |
| AMPD3                                   | Adenosine Monophosphate Deaminase (Isoform E)                                                        | -3.79                              | 0.78 |
| AK128714                                | -                                                                                                    | -3.78                              | 0.81 |
| A_24_P281683                            | -                                                                                                    | -3.71                              | 0.79 |
| GPR34                                   | G Protein-Coupled Receptor 34                                                                        | -3.71                              | 0.81 |
| LCP1                                    | Lymphocyte Cytosolic Protein 1 (L-Plastin)                                                           | -3.70                              | 0.65 |
| SPP1                                    | Secreted Phosphoprotein 1 (Osteopontin, Bone Sialoprotein I, Early T-Lymphocyte Activation 1)        | -3.68                              | 0.44 |
| TIMP1                                   | Timp Metallopeptidase Inhibitor 1                                                                    | -3.65                              | 0.76 |
| HCST                                    | Hematopoietic Cell Signal Transducer                                                                 | -3.65                              | 0.71 |
| MRC1L1                                  | Mannose Receptor, C Type 1-Like 1                                                                    | -3.65                              | 0.75 |
| BLOC1S2                                 | Biogenesis Of Lysosome-Related Organelles Complex-1,                                                 | -3.64                              | 0.84 |

| Subunit 2       |                                                                                               |       |      |
|-----------------|-----------------------------------------------------------------------------------------------|-------|------|
| TUBA6           | Tubulin, Alpha, Ubiquitous                                                                    | -3.64 | 0.78 |
| CYBA            | Cytochrome B-245, Alpha Polypeptide                                                           | -3.63 | 0.80 |
| SPP1            | Secreted Phosphoprotein 1 (Osteopontin, Bone Sialoprotein I, Early T-Lymphocyte Activation 1) | -3.60 | 0.44 |
| SPP1            | Secreted Phosphoprotein 1 (Osteopontin, Bone Sialoprotein I, Early T-Lymphocyte Activation 1) | -3.60 | 0.44 |
| SFRP4           | Secreted Frizzled-Related Protein 4                                                           | -3.59 | 0.71 |
| PSAP            | Prosaposin (Variant Gaucher Disease And Variant Metachromatic Leukodystrophy)                 | -3.56 | 0.81 |
| MARCO           | Macrophage Receptor With Collagenous Structure                                                | -3.56 | 0.63 |
| LOXL2           | Lysyl Oxidase-Like 2                                                                          | -3.55 | 0.81 |
| C12orf5         | Chromosome 12 Open Reading Frame 5                                                            | -3.54 | 0.82 |
| VSIG4           | V-Set And Immunoglobulin Domain Containing 4                                                  | -3.53 | 0.66 |
| ENST00000324925 | -                                                                                             | -3.53 | 0.83 |
| SPP1            | Secreted Phosphoprotein 1 (Osteopontin, Bone Sialoprotein I, Early T-Lymphocyte Activation 1) | -3.53 | 0.46 |
| CHI3L1          | Chitinase 3-Like 1 (Cartilage Glycoprotein-39)                                                | -3.51 | 0.65 |
| SPP1            | Secreted Phosphoprotein 1 (Osteopontin, Bone Sialoprotein I, Early T-Lymphocyte Activation 1) | -3.51 | 0.47 |
| CTSZ            | Cathepsin Z                                                                                   | -3.50 | 0.79 |
| VAMP8           | Vesicle-Associated Membrane Protein 8 (Endobrevin)                                            | -3.49 | 0.73 |
| SPP1            | Secreted Phosphoprotein 1 (Osteopontin, Bone Sialoprotein I, Early T-Lymphocyte Activation 1) | -3.47 | 0.47 |
| SPP1            | Secreted Phosphoprotein 1 (Osteopontin, Bone Sialoprotein I, Early T-Lymphocyte Activation 1) | -3.47 | 0.48 |
| LOXL2           | Lysyl Oxidase-Like 2                                                                          | -3.47 | 0.85 |
| LOXL2           | Lysyl Oxidase-Like 2                                                                          | -3.47 | 0.85 |
| C1orf162        | Chromosome 1 Open Reading Frame 162                                                           | -3.46 | 0.73 |
| BQ049338        | -                                                                                             | -3.44 | 0.72 |
| -               | Cd163 Antigen                                                                                 | -3.44 | 0.65 |
| NQO1            | Nad(P)H Dehydrogenase, Quinone 1                                                              | -3.44 | 0.78 |
| SPP1            | Secreted Phosphoprotein 1 (Osteopontin, Bone Sialoprotein I, Early T-Lymphocyte Activation 1) | -3.43 | 0.40 |
| RGS10           | Regulator Of G-Protein Signalling 10                                                          | -3.42 | 0.76 |
| PGM2            | Phosphoglucomutase 2                                                                          | -3.42 | 0.89 |
| CCR1            | Chemokine (C-C Motif) Receptor 1                                                              | -3.39 | 0.68 |
| KIAA1598        | Kiaa1598                                                                                      | -3.37 | 0.82 |
| C1QB            | Complement Component 1, Q Subcomponent, B Chain                                               | -3.36 | 0.69 |
| SLCO2B1         | Solute Carrier Organic Anion Transporter Family, Member 2b1                                   | -3.30 | 0.72 |
| LOXL2           | Lysyl Oxidase-Like 2                                                                          | -3.29 | 0.84 |
| HSPA8           | Heat Shock 70kda Protein 8                                                                    | -3.29 | 0.85 |
| SLAMF8          | Slam Family Member 8                                                                          | -3.28 | 0.69 |
| TUBA1           | Tubulin, Alpha 1 (Testis Specific)                                                            | -3.28 | 0.82 |
| CD248           | Cd248 Antigen, Endosialin                                                                     | -3.28 | 0.77 |
| ITGB5           | Integrin, Beta 5                                                                              | -3.27 | 0.83 |
| PLA2G7          | Phospholipase A2, Group Vii (Platelet-Activating Factor                                       | -3.27 | 0.54 |

|                 | Acetylhydrolase, Plasma)                                                       |       |      |
|-----------------|--------------------------------------------------------------------------------|-------|------|
| SLC7A7          | Solute Carrier Family 7 (Cationic Amino Acid Transporter, Y+ System), Member 7 | -3.26 | 0.81 |
| GLB1            | Galactosidase, Beta 1                                                          | -3.22 | 0.79 |
| NPL             | N-Acetylneuraminate Pyruvate Lyase (Dihydrodipicolinate Synthase)              | -3.22 | 0.67 |
| FCGBP           | Fc Fragment Of Igg Binding Protein                                             | -3.21 | 0.62 |
| CD52            | Cd52 Antigen (Campath-1 Antigen)                                               | -3.21 | 0.58 |
| LGMN            | Legumain                                                                       | -3.20 | 0.81 |
| FTH1            | Ferritin, Heavy Polypeptide 1                                                  | -3.18 | 0.82 |
| IFI30           | Interferon, Gamma-Inducible Protein 30                                         | -3.17 | 0.58 |
| GLIPR1          | Gli Pathogenesis-Related 1 (Glioma)                                            | -3.16 | 0.83 |
| PLEK            | Pleckstrin                                                                     | -3.16 | 0.79 |
| MFAP5           | Microfibrillar Associated Protein 5                                            | -3.16 | 0.78 |
| MS4A6A          | Cd20-Like Precursor                                                            | -3.15 | 0.74 |
| MS4A4A          | Membrane-Spanning 4-Domains, Subfamily A, Member 4                             | -3.15 | 0.70 |
| PPGB            | Protective Protein For Beta-Galactosidase (Galactosialidosis)                  | -3.15 | 0.83 |
| GSTO1           | Glutathione S-Transferase Omega 1                                              | -3.14 | 0.80 |
| S100A11         | S100 Calcium Binding Protein A11 (Calgizzarin)                                 | -3.14 | 0.81 |
| EMP3            | Epithelial Membrane Protein 3                                                  | -3.14 | 0.80 |
| BCAT1           | Branched Chain Aminotransferase 1, Cytosolic                                   | -3.13 | 0.74 |
| MSR1            | Macrophage Scavenger Receptor 1                                                | -3.12 | 0.72 |
| LAPTM5          | Lysosomal Associated Multispanning Membrane Protein 5                          | -3.12 | 0.71 |
| CSTB            | Cystatin B (Stefin B)                                                          | -3.12 | 0.79 |
| LIPA            | Lipase A, Lysosomal Acid, Cholesterol Esterase (Wolman Disease)                | -3.11 | 0.64 |
| CTSB            | Cathepsin B                                                                    | -3.10 | 0.77 |
| GLIPR1          | Gli Pathogenesis-Related 1 (Glioma)                                            | -3.09 | 0.74 |
| AADACL1         | Arylacetamide Deacetylase-Like 1                                               | -3.09 | 0.61 |
| A_24_P110601    | -                                                                              | -3.09 | 0.82 |
| RPN2            | Ribophorin Ii                                                                  | -3.09 | 0.83 |
| A_24_P92823     | -                                                                              | -3.09 | 0.88 |
| SNX10           | Sorting Nexin 10                                                               | -3.08 | 0.80 |
| F13A1           | Coagulation Factor Xiii, A1 Polypeptide                                        | -3.07 | 0.72 |
| TTYH3           | Tweety Homolog 3 (Drosophila)                                                  | -3.07 | 0.75 |
| ECGF1           | Endothelial Cell Growth Factor 1 (Platelet-Derived)                            | -3.06 | 0.74 |
| CTSB            | Cathepsin B                                                                    | -3.05 | 0.69 |
| LOC401115       | Hypothetical Gene Supported By Bc038466; Bc062790                              | -3.05 | 0.83 |
| A_24_P349869    | -                                                                              | -3.05 | 0.80 |
| TUBA6           | Tubulin, Alpha, Ubiquitous                                                     | -3.04 | 0.81 |
| MT1H            | Metallothionein 1h                                                             | -3.04 | 0.84 |
| C20orf24        | Chromosome 20 Open Reading Frame 24                                            | -3.04 | 0.83 |
| GPR109B         | G Protein-Coupled Receptor 109b                                                | -3.04 | 0.90 |
| BYSL            | Bystin-Like                                                                    | -3.04 | 0.86 |
| ENST00000333604 | -                                                                              | -3.03 | 0.87 |

|               |                                                                                                        |       |      |
|---------------|--------------------------------------------------------------------------------------------------------|-------|------|
| DKFZP586H2123 | Regeneration Associated Muscle Protease                                                                | -3.03 | 0.87 |
| C1QG          | Complement component 1, q subcomponent, C chain                                                        | -3.03 | 0.76 |
| TMEM33        | Transmembrane Protein 33                                                                               | -3.02 | 0.83 |
| EMILIN2       | Elastin Microfibril Interfacer 2                                                                       | -3.02 | 0.71 |
| COMT          | Catechol-O-Methyltransferase                                                                           | -3.02 | 0.85 |
| LOC389033     | Hypothetical Loc389033                                                                                 | -3.01 | 0.83 |
| MT1G          | Metallothionein 1g                                                                                     | -2.99 | 0.78 |
| STAB1         | Stabilin 1                                                                                             | -2.99 | 0.80 |
| TUBA6         | Tubulin, Alpha, Ubiquitous                                                                             | -2.99 | 0.79 |
| MT1E          | Metallothionein 1e (Functional)                                                                        | -2.99 | 0.83 |
| CSF1R         | Colony Stimulating Factor 1 Receptor, Formerly McDonough Feline Sarcoma Viral (V-Fms) Oncogene Homolog | -2.99 | 0.74 |
| TNFRSF12A     | Tumor Necrosis Factor Receptor Superfamily, Member 12a                                                 | -2.99 | 0.72 |
| MS4A7         | Membrane-Spanning 4-Domains, Subfamily A, Member 7                                                     | -2.98 | 0.72 |
| CES1          | Carboxylesterase 1 (Monocyte/Macrophage Serine Esterase 1)                                             | -2.98 | 0.75 |
| LHFPL2        | Lipoma Hmgic Fusion Partner-Like 2                                                                     | -2.97 | 0.80 |
| FCGR2B        | Fc Fragment Of Igg, Low Affinity Iib, Receptor (Cd32)                                                  | -2.97 | 0.74 |
| PEPD          | Peptidase D                                                                                            | -2.97 | 0.87 |
| ITGAM         | Integrin, Alpha M (Complement Component 3 Receptor 3 Subunit)                                          | -2.96 | 0.77 |
| ITGB2         | Integrin, Beta 2 (Complement Component 3 Receptor 3 And 4 Subunit)                                     | -2.96 | 0.67 |
| CLU           | Clusterin                                                                                              | -2.95 | 0.78 |
| FOLR2         | Folate Receptor 2 (Fetal)                                                                              | -2.95 | 0.76 |
| MMP9          | Matrix Metallopeptidase 9 (Gelatinase B, 92kda Gelatinase, 92kda Type Iv Collagenase)                  | -2.94 | 0.48 |
| TPM4          | Tropomyosin 4                                                                                          | -2.93 | 0.82 |
| MAFB          | V-Maf Musculoaponeurotic Fibrosarcoma Oncogene Homolog B (Avian)                                       | -2.93 | 0.80 |
| FADS3         | Fatty Acid Desaturase 3                                                                                | -2.93 | 0.86 |
| MT1L          | Metallothionein 1l                                                                                     | -2.92 | 0.82 |
| -             | Cd14 Antigen                                                                                           | -2.92 | 0.73 |
| CTSB          | Cathepsin B                                                                                            | -2.91 | 0.72 |
| SLC7A4        | Solute Carrier Family 7 (Cationic Amino Acid Transporter, Y+ System), Member 4                         | -2.91 | 0.83 |
| PPGB          | Protective Protein For Beta-Galactosidase (Galactosialidosis)                                          | -2.90 | 0.88 |
| FLJ20647      | Hypothetical Protein Flj20647                                                                          | -2.90 | 0.83 |
| H2-ALPHA      | Alpha-Tubulin Isotype H2-Alpha                                                                         | -2.89 | 0.82 |
| MECR          | Mitochondrial Trans-2-Enoyl-Coa Reductase                                                              | -2.87 | 0.85 |
| UBQLN1        | Ubiquilin 1                                                                                            | -2.87 | 0.88 |
| HAVCR2        | Hepatitis A Virus Cellular Receptor 2                                                                  | -2.87 | 0.72 |
| RARRES1       | Retinoic Acid Receptor Responder (Tazarotene Induced) 1                                                | -2.87 | 0.82 |
| IRF5          | Interferon Regulatory Factor 5                                                                         | -2.87 | 0.78 |
| RAC2          | Ras-Related C3 Botulinum Toxin Substrate 2 (Rho Family, Small Gtp Binding Protein Rac2)                | -2.86 | 0.77 |
| ATF3          | Activating Transcription Factor 3                                                                      | -2.85 | 0.70 |

|              |                                                                                          |       |      |
|--------------|------------------------------------------------------------------------------------------|-------|------|
| MT1H         | Metallothionein 1h                                                                       | -2.85 | 0.84 |
| TM7SF1       | G protein-coupled receptor 137B                                                          | -2.85 | 0.83 |
| MICAL2       | Microtubule Associated Monooxygenase, Calponin And Lim Domain Containing 2               | -2.85 | 0.90 |
| URP2         | Unc-112 Related Protein 2                                                                | -2.85 | 0.74 |
| TGFBI        | Transforming Growth Factor, Beta-Induced, 68kda                                          | -2.84 | 0.79 |
| PRO1855      | -                                                                                        | -2.84 | 0.86 |
| MMP19        | Matrix Metalloproteinase 18                                                              | -2.83 | 0.78 |
| C2           | Complement Component 2                                                                   | -2.83 | 0.83 |
| C1orf38      | Chromosome 1 Open Reading Frame 38                                                       | -2.82 | 0.79 |
| SLC16A3      | Solute Carrier Family 16 (Monocarboxylic Acid Transporters), Member 3                    | -2.82 | 0.71 |
| ENO1         | Enolase 1, (Alpha)                                                                       | -2.81 | 0.85 |
| MXRA5        | Matrix-Remodelling Associated 5                                                          | -2.81 | 0.75 |
| LILRB5       | Leukocyte Immunoglobulin-Like Receptor, Subfamily B (With Tm And Itim Domains), Member 5 | -2.81 | 0.71 |
| KYNU         | Kynureninase (L-Kynurenine Hydrolase)                                                    | -2.81 | 0.72 |
| CREG1        | Cellular Repressor Of E1a-Stimulated Genes 1                                             | -2.81 | 0.86 |
| CSPG2        | Chondroitin Sulfate Proteoglycan 2 (Versican)                                            | -2.80 | 0.82 |
| GATM         | Glycine Amidinotransferase (L-Arginine:Glycine Amidinotransferase)                       | -2.79 | 0.83 |
| C20orf24     | Chromosome 20 Open Reading Frame 24                                                      | -2.78 | 0.82 |
| A_24_P835388 | -                                                                                        | -2.77 | 0.80 |
| AK126405     | -                                                                                        | -2.77 | 0.76 |
| -            | Cd68 Antigen                                                                             | -2.77 | 0.72 |
| AGPAT3       | 1-Acylglycerol-3-Phosphate O-Acyltransferase 3                                           | -2.77 | 0.81 |
| DUSP6        | Dual Specificity Phosphatase 6                                                           | -2.77 | 0.84 |
| GGH          | Gamma-Glutamyl Hydrolase (Conjugase, Folylpolygammaglutamyl Hydrolase)                   | -2.77 | 0.87 |
| GLB1         | Galactosidase, Beta 1                                                                    | -2.76 | 0.83 |
| LOXL2        | Lysyl Oxidase-Like 2                                                                     | -2.76 | 0.84 |
| LY86         | Lymphocyte Antigen 86                                                                    | -2.76 | 0.82 |
| NRAS         | V-Ha-Ras Harvey Rat Sarcoma Viral Oncogene Homolog                                       | -2.75 | 0.88 |
| C22orf9      | Chromosome 22 Open Reading Frame 9                                                       | -2.75 | 0.83 |
| CSTA         | Cystatin A (Stefin A)                                                                    | -2.74 | 0.84 |
| A_23_P21882  | -                                                                                        | -2.74 | 0.84 |
| IL10RA       | Interleukin 10 Receptor, Alpha                                                           | -2.74 | 0.76 |
| CKS2         | Cdc28 Protein Kinase Regulatory Subunit 2                                                | -2.74 | 0.80 |
| VKORC1L1     | Vitamin K Epoxide Reductase Complex, Subunit 1-Like 1                                    | -2.74 | 0.85 |
| -            | Extracellular Link Domain Containing 1                                                   | -2.74 | 0.78 |
| SRD5A2L      | Steroid 5 Alpha-Reductase 2-Like                                                         | -2.72 | 0.88 |
| UCHL1        | Ubiquitin Carboxyl-Terminal Esterase L1 (Ubiquitin Thiolesterase)                        | -2.72 | 0.71 |
| LAPTM5       | Lysosomal Associated Multispanning Membrane Protein 5                                    | -2.72 | 0.75 |
| DNCL1        | Dynein, light chain, LC8-type 1                                                          | -2.72 | 0.88 |
| TUBA3        | Tubulin, Alpha 3                                                                         | -2.72 | 0.81 |

|              |                                                                       |       |      |
|--------------|-----------------------------------------------------------------------|-------|------|
| ADAM12       | Adam Metallopeptidase Domain 12 (Meltrin Alpha)                       | -2.71 | 0.85 |
| WDFY4        | Wdfy Family Member 4                                                  | -2.70 | 0.76 |
| RAB31        | Rab31, Member Ras Oncogene Family                                     | -2.70 | 0.87 |
| MKKS         | Mckusick-Kaufman Syndrome                                             | -2.70 | 0.92 |
| SAT          | Spermidine/Spermine N1-Acetyltransferase                              | -2.70 | 0.84 |
| SYK          | Spleen Tyrosine Kinase                                                | -2.70 | 0.84 |
| FN1          | Fibronectin 1                                                         | -2.70 | 0.82 |
| CTSC         | Cathepsin C                                                           | -2.69 | 0.87 |
| MT1B         | Metallothionein 1b (Functional)                                       | -2.69 | 0.81 |
| LDHA         | Lactate Dehydrogenase A                                               | -2.69 | 0.88 |
| TMCO3        | Transmembrane And Coiled-Coil Domains 3                               | -2.69 | 0.90 |
| MT1X         | Metallothionein 1x                                                    | -2.68 | 0.84 |
| DC13         | chromosome 16 open reading frame 61                                   | -2.68 | 0.90 |
| GSTO1        | Glutathione S-Transferase Omega 1                                     | -2.68 | 0.82 |
| BLOC1S2      | Biogenesis Of Lysosome-Related Organelles Complex-1,<br>Subunit 2     | -2.68 | 0.84 |
| SOD2         | Superoxide Dismutase 2, Mitochondrial                                 | -2.68 | 0.85 |
| C20orf55     | Chromosome 20 Open Reading Frame 55                                   | -2.68 | 0.90 |
| ARPC1B       | Actin Related Protein 2/3 Complex, Subunit 1b, 41kda                  | -2.67 | 0.78 |
| TXN          | Thioredoxin                                                           | -2.66 | 0.86 |
| C1orf162     | Chromosome 1 Open Reading Frame 162                                   | -2.66 | 0.79 |
| RPS27L       | Ribosomal Protein S27-Like                                            | -2.66 | 0.90 |
| CPVL         | Carboxypeptidase, Vitellogenic-Like                                   | -2.66 | 0.84 |
| CR593158     | -                                                                     | -2.66 | 0.80 |
| MS4A6A       | Cd20-Like Precursor                                                   | -2.66 | 0.81 |
| ECT2         | Epithelial Cell Transforming Sequence 2 Oncogene                      | -2.65 | 0.89 |
| SDSL         | Serine Dehydratase-Like                                               | -2.65 | 0.84 |
| ATP6V1B2     | Atpase, H+ Transporting, Lysosomal 56/58kda, V1 Subunit<br>B2         | -2.65 | 0.83 |
| HLA-DMA      | Major Histocompatibility Complex, Class Ii, Dm Alpha                  | -2.64 | 0.86 |
| MMP19        | Matrix Metalloproteinase 18                                           | -2.63 | 0.77 |
| BIT1         | Peptidyl-tRNA hydrolase 2 (PTRH2)                                     | -2.63 | 0.88 |
| RAB31        | Rab31, Member Ras Oncogene Family                                     | -2.63 | 0.86 |
| VAMP4        | Vesicle-Associated Membrane Protein 4                                 | -2.62 | 0.90 |
| FBP1         | Fructose-1,6-Bisphosphatase 1                                         | -2.62 | 0.76 |
| LOC552891    | Guanine Nucleotide Binding Protein (G Protein), Gamma 10              | -2.62 | 0.87 |
| GNB1         | Guanine Nucleotide Binding Protein (G Protein), Beta<br>Polypeptide 1 | -2.62 | 0.87 |
| MT1A         | Metallothionein 1a (Functional)                                       | -2.62 | 0.86 |
| A_24_P264685 | -                                                                     | -2.61 | 0.86 |
| A_24_P383901 | -                                                                     | -2.61 | 0.85 |
| CCL2         | Chemokine (C-C Motif) Ligand 2                                        | -2.61 | 0.74 |
| ARRDC4       | Arrestin Domain Containing 4                                          | -2.61 | 0.89 |
| CCL13        | Chemokine (C-C Motif) Ligand 13                                       | -2.61 | 0.72 |
| MT2A         | Metallothionein 2a                                                    | -2.61 | 0.81 |

|                 |                                                                      |       |      |
|-----------------|----------------------------------------------------------------------|-------|------|
| FLJ20273        | Rna-Binding Protein                                                  | -2.61 | 0.82 |
| TK1             | Thymidine Kinase 1, Soluble                                          | -2.60 | 0.71 |
| CSTA            | Cystatin A (Stefin A)                                                | -2.59 | 0.87 |
| SLC31A2         | Solute Carrier Family 31 (Copper Transporters), Member 2             | -2.59 | 0.82 |
| SLC38A6         | Solute Carrier Family 38, Member 6                                   | -2.59 | 0.81 |
| MAPRE1          | Microtubule-Associated Protein, Rp/Eb Family, Member 1               | -2.59 | 0.91 |
| THC2365247      | -                                                                    | -2.57 | 0.84 |
| C7orf20         | Chromosome 7 Open Reading Frame 20                                   | -2.56 | 0.90 |
| IL1R1           | Interleukin 1 Receptor, Type I                                       | -2.56 | 0.88 |
| MRPL17          | Mitochondrial Ribosomal Protein L17                                  | -2.55 | 0.88 |
| ENST00000308384 | -                                                                    | -2.55 | 0.86 |
| FCER1G          | Fc Fragment Of Ige, High Affinity I, Receptor For; Gamma Polypeptide | -2.54 | 0.83 |
| ADCY7           | Adenylate Cyclase 7                                                  | -2.54 | 0.89 |
| IL10RA          | Interleukin 10 Receptor, Alpha                                       | -2.54 | 0.83 |
| LOC202459       | Similar To Riken Cdna 2310008m10                                     | -2.53 | 0.88 |
| COL5A2          | Collagen, Type V, Alpha 2                                            | -2.53 | 0.84 |
| DSCR1           | Down Syndrome Critical Region Gene 1                                 | -2.53 | 0.88 |
| KPNA2           | Karyopherin Alpha 2 (Rag Cohort 1, Importin Alpha 1)                 | -2.53 | 0.82 |
| MYO5A           | Myosin Va (Heavy Polypeptide 12, Myosin)                             | -2.53 | 0.89 |
| ARRB2           | Arrestin, Beta 2                                                     | -2.53 | 0.82 |
| ACTC            | Actin, Alpha, Cardiac Muscle                                         | -2.52 | 0.84 |
| FDX1            | Ferredoxin 1                                                         | -2.52 | 0.85 |
| CTSC            | Cathepsin C                                                          | -2.52 | 0.86 |
| PTAFR           | Platelet-Activating Factor Receptor                                  | -2.51 | 0.85 |
| CXCL9           | Chemokine (C-X-C Motif) Ligand 9                                     | -2.51 | 0.79 |
| ST14            | Suppression Of Tumorigenicity 14 (Colon Carcinoma)                   | -2.51 | 0.76 |
| LOC96610        | Hypothetical Protein Similar To Kiaa0187 Gene Product                | -2.51 | 0.89 |
| RNASE1          | Ribonuclease, Rnase A Family, 1 (Pancreatic)                         | -2.51 | 0.85 |
| RRAS2           | Related Ras Viral (R-Ras) Oncogene Homolog 2                         | -2.50 | 0.84 |
| A_24_P58647     | -                                                                    | -2.50 | 0.88 |
| LDLR            | Low Density Lipoprotein Receptor (Familial Hypercholesterolemia)     | -2.50 | 0.83 |
| CTSS            | Cathepsin S                                                          | -2.49 | 0.76 |
| C6orf51         | Chromosome 6 Open Reading Frame 51                                   | -2.49 | 0.87 |
| PGK1            | Phosphoglycerate Kinase 1                                            | -2.49 | 0.86 |
| CD33            | Cd33 Antigen (Gp67)                                                  | -2.49 | 0.87 |
| SH3BGL3         | Sh3 Domain Binding Glutamic Acid-Rich Protein Like 3                 | -2.48 | 0.84 |
| CKIP-1          | Leckstrin homology domain containing, family O member 1              | -2.48 | 0.82 |
| RACGAP1         | Rac Gtpase Activating Protein 1                                      | -2.48 | 0.88 |
| C9orf19         | 17kd Fetal Brain Protein                                             | -2.48 | 0.79 |
| HSPC196         | Hypothetical Protein Hspc196                                         | -2.47 | 0.89 |
| HIST2H2AA       | Histone 2, H2aa                                                      | -2.47 | 0.88 |
| AIF1            | Allograft Inflammatory Factor 1                                      | -2.46 | 0.77 |
| DRB1            | Developmentally Regulated Rna-Binding Protein 1                      | -2.46 | 0.93 |

|                 |                                                                               |       |      |
|-----------------|-------------------------------------------------------------------------------|-------|------|
| STK38L          | Serine/Threonine Kinase 38 Like                                               | -2.45 | 0.90 |
| GPC1            | Glypican 1                                                                    | -2.45 | 0.79 |
| PGK1            | Phosphoglycerate Kinase 1                                                     | -2.45 | 0.87 |
| HLA-DPB1        | Major Histocompatibility Complex, Class Ii, Dp Beta 1                         | -2.45 | 0.85 |
| SCARA3          | Scavenger Receptor Class A, Member 3                                          | -2.45 | 0.83 |
| THC2279832      | -                                                                             | -2.45 | 0.80 |
| A_24_P212314    | -                                                                             | -2.45 | 0.82 |
| GMFB            | Glia Maturation Factor, Beta                                                  | -2.45 | 0.84 |
| FLJ22875        | -                                                                             | -2.45 | 0.83 |
| CD209           | Cd209 Antigen                                                                 | -2.44 | 0.83 |
| THC2364841      | -                                                                             | -2.44 | 0.84 |
| BX647543        | -                                                                             | -2.44 | 0.80 |
| ENST00000245185 | -                                                                             | -2.44 | 0.83 |
| CD9             | Cd9 Antigen (P24)                                                             | -2.44 | 0.80 |
| C6orf115        | Chromosome 6 Open Reading Frame 115                                           | -2.44 | 0.81 |
| CD53            | Cd53 Antigen                                                                  | -2.42 | 0.78 |
| CCR5            | Chemokine (C-C Motif) Receptor 5                                              | -2.41 | 0.79 |
| CKLFSF6         | -                                                                             | -2.41 | 0.88 |
| ENST00000309178 | -                                                                             | -2.41 | 0.90 |
| TPM3            | Tropomyosin 3                                                                 | -2.40 | 0.88 |
| LOC96610        | Hypothetical Protein Similar To Kiaa0187 Gene Product                         | -2.40 | 0.91 |
| A_24_P264416    | -                                                                             | -2.40 | 0.83 |
| LOC96610        | Hypothetical Protein Similar To Kiaa0187 Gene Product                         | -2.40 | 0.89 |
| S100A11         | S100 Calcium Binding Protein A11 (Calgizzarin)                                | -2.40 | 0.83 |
| TUBB3           | Melanocortin 1 Receptor (Alpha Melanocyte Stimulating Hormone Receptor)       | -2.39 | 0.82 |
| CIAS1           | Chromosome 1 Open Reading Frame 7                                             | -2.39 | 0.86 |
| SGK             | Serum/Glucocorticoid Regulated Kinase                                         | -2.39 | 0.78 |
| BDKRB2          | Bradykinin Receptor B2                                                        | -2.39 | 0.82 |
| HLA-DMB         | Major Histocompatibility Complex, Class Ii, Dm Beta                           | -2.39 | 0.83 |
| PSAP            | Prosaposin (Variant Gaucher Disease And Variant Metachromatic Leukodystrophy) | -2.38 | 0.86 |
| SULT1A2         | Sulfotransferase Family, Cytosolic, 1a, Phenol-Preferring, Member 2           | -2.38 | 0.86 |
| FOLR2           | Folate Receptor 2 (Fetal)                                                     | -2.38 | 0.80 |
| TUBB2           | Tubulin, beta 2A                                                              | -2.37 | 0.78 |
| PSMD14          | Proteasome (Prosome, Macropain) 26s Subunit, Non-Atpase, 14                   | -2.37 | 0.91 |
| GAPDH           | Glyceraldehyde-3-Phosphate Dehydrogenase                                      | -2.37 | 0.84 |
| ZCSL2           | Zinc Finger, Csl-Type Containing 2                                            | -2.37 | 0.88 |
| MTCH2           | Mitochondrial Carrier Homolog 2 (C. Elegans)                                  | -2.37 | 0.90 |
| ATOX1           | Atx1 Antioxidant Protein 1 Homolog (Yeast)                                    | -2.37 | 0.86 |
| FUCA1           | Fucosidase, Alpha-L- 1, Tissue                                                | -2.37 | 0.82 |
| PKP3            | Plakophilin 3                                                                 | -2.37 | 0.91 |
| PGDS            | Prostaglandin D2 Synthase, Hematopoietic                                      | -2.37 | 0.79 |
| DNCL1           | Dynein, light chain, LC8-type 1                                               | -2.36 | 0.87 |



|                 |                                                                                  |       |      |
|-----------------|----------------------------------------------------------------------------------|-------|------|
| PSCD4           | Pleckstrin Homology, Sec7 And Coiled-Coil Domains 4                              | -2.36 | 0.82 |
| FN1             | Fibronectin 1                                                                    | -2.36 | 0.85 |
| COLEC11         | Collectin Sub-Family Member 11                                                   | -2.36 | 0.86 |
| ALG9            | Asparagine-Linked Glycosylation 9 Homolog (Yeast, Alpha-1,2-Mannosyltransferase) | -2.36 | 0.89 |
| H2AFY           | H2a Histone Family, Member Y                                                     | -2.35 | 0.87 |
| EDARADD         | Edar-Associated Death Domain                                                     | -2.35 | 0.85 |
| ATP6V0C         | Atpase, H+ Transporting, Lysosomal 16kda, V0 Subunit C                           | -2.35 | 0.90 |
| ATP1B1          | Atpase, Na+/K+ Transporting, Beta 1 Polypeptide                                  | -2.35 | 0.74 |
| C13orf12        | Chromosome 13 Open Reading Frame 12                                              | -2.35 | 0.90 |
| HLA-DMA         | Major Histocompatibility Complex, Class Ii, Dm Alpha                             | -2.34 | 0.84 |
| ATP6V0B         | Atpase, H+ Transporting, Lysosomal 21kda, V0 Subunit B                           | -2.34 | 0.85 |
| NOMO1           | Nodal Modulator 1                                                                | -2.34 | 0.91 |
| A_24_P255303    | -                                                                                | -2.33 | 0.88 |
| DCTD            | Dcmp Deaminase                                                                   | -2.33 | 0.89 |
| NPC2            | Niemann-Pick Disease, Type C2                                                    | -2.33 | 0.82 |
| GLRX            | Glutaredoxin (Thioltransferase)                                                  | -2.33 | 0.87 |
| A_24_P187626    | -                                                                                | -2.33 | 0.80 |
| C19orf28        | Hypothetical Protein Pp3501                                                      | -2.33 | 0.76 |
| IER3            | Immediate Early Response 3                                                       | -2.33 | 0.83 |
| SLC39A14        | Solute Carrier Family 39 (Zinc Transporter), Member 14                           | -2.32 | 0.85 |
| APH1B           | Anterior Pharynx Defective 1 Homolog B (C. Elegans)                              | -2.32 | 0.88 |
| LOX             | Lysyl Oxidase                                                                    | -2.32 | 0.87 |
| CCRL2           | Chemokine (C-C Motif) Receptor-Like 2                                            | -2.32 | 0.85 |
| CD47            | Cd47 Antigen (Rh-Related Antigen, Integrin-Associated Signal Transducer)         | -2.31 | 0.86 |
| PLTP            | Phospholipid Transfer Protein                                                    | -2.31 | 0.81 |
| RNF141          | Ring Finger Protein 141                                                          | -2.31 | 0.87 |
| ENST00000272762 | -                                                                                | -2.31 | 0.88 |
| ACTR3           | Arp3 Actin-Related Protein 3 Homolog (Yeast)                                     | -2.30 | 0.85 |
| LACE1           | Lactation Elevated-1                                                             | -2.30 | 0.92 |
| SNCG            | Synuclein, Gamma (Breast Cancer-Specific Protein 1)                              | -2.30 | 0.86 |
| RNASET2         | Ribonuclease T2                                                                  | -2.29 | 0.83 |
| ACTB            | Actin, Beta                                                                      | -2.29 | 0.86 |
| LGALS9          | Lectin, Galactoside-Binding, Soluble, 9 (Galectin 9)                             | -2.29 | 0.81 |
| MAN2B1          | Mannosidase, Alpha, Class 2b, Member 1                                           | -2.29 | 0.85 |
| A_24_P49800     | -                                                                                | -2.29 | 0.83 |
| TMED5           | Transmembrane Emp24 Protein Transport Domain Containing 5                        | -2.29 | 0.89 |
| AI379175        | -                                                                                | -2.29 | 0.85 |
| IMPA3           | cDNA FLJ33669 fis, clone BRAMY2028740                                            | -2.29 | 0.87 |
| LOC493856       | Similar To Riken Cdna 1500009m05 Gene                                            | -2.29 | 0.87 |
| CYB561D2        | Cytochrome B-561 Domain Containing 2                                             | -2.28 | 0.89 |
| DPP3            | Dipeptidyl-Peptidase 3                                                           | -2.28 | 0.86 |
| A_24_P161655    | -                                                                                | -2.28 | 0.89 |

|                 |                                                                                             |       |      |
|-----------------|---------------------------------------------------------------------------------------------|-------|------|
| ACTR3           | Arp3 Actin-Related Protein 3 Homolog (Yeast)                                                | -2.28 | 0.86 |
| SPINT2          | Serine Peptidase Inhibitor, Kunitz Type, 2                                                  | -2.28 | 0.83 |
| A_23_P170719    | -                                                                                           | -2.27 | 0.81 |
| LOC442204       | Similar To Myosin Regulatory Light Chain-Like                                               | -2.27 | 0.89 |
| STAT3           | Signal Transducer And Activator Of Transcription 3 (Acute-Phase Response Factor)            | -2.27 | 0.91 |
| ATP6V1F         | Atpase, H+ Transporting, Lysosomal 14kda, V1 Subunit F                                      | -2.27 | 0.85 |
| A_24_P247175    | -                                                                                           | -2.27 | 0.86 |
| C22orf9         | Chromosome 22 Open Reading Frame 9                                                          | -2.26 | 0.83 |
| C1QA            | Complement Component 1, Q Subcomponent, A Chain                                             | -2.25 | 0.77 |
| MPEG1           | Macrophage Expressed Gene 1                                                                 | -2.25 | 0.81 |
| SVH             | Svh Protein                                                                                 | -2.25 | 0.92 |
| EFHD2           | Ef-Hand Domain Family, Member D2                                                            | -2.24 | 0.86 |
| FLJ21103        | Hypothetical Protein Flj21103                                                               | -2.24 | 0.91 |
| GDF15           | Growth Differentiation Factor 15                                                            | -2.24 | 0.67 |
| A_23_P170713    | -                                                                                           | -2.24 | 0.82 |
| P4HB            | Procollagen-Proline, 2-Oxoglutarate 4-Dioxygenase (Proline 4-Hydroxylase), Beta Polypeptide | -2.24 | 0.87 |
| TRPV2           | Vanilloid Receptor-Like Protein 1                                                           | -2.24 | 0.79 |
| TCTEL1          | Dynein, light chain, Tctex-type 1                                                           | -2.23 | 0.91 |
| RAC2            | Ras-Related C3 Botulinum Toxin Substrate 2 (Rho Family, Small Gtp Binding Protein Rac2)     | -2.23 | 0.79 |
| AF086044        | -                                                                                           | -2.23 | 0.84 |
| SRXN1           | Sulfiredoxin 1 Homolog (S. Cerevisiae)                                                      | -2.23 | 0.91 |
| ENST00000303830 | -                                                                                           | -2.23 | 0.85 |
| TUBB8           | Tubulin, Beta 8                                                                             | -2.23 | 0.82 |
| SPCS3           | Signal Peptidase Complex Subunit 3 Homolog (S. Cerevisiae)                                  | -2.23 | 0.85 |
| SMPD1           | Sphingomyelin Phosphodiesterase 1, Acid Lysosomal (Acid Sphingomyelinase)                   | -2.23 | 0.90 |
| FGR             | Gardner-Rasheed Feline Sarcoma Viral (V-Fgr) Oncogene Homolog                               | -2.23 | 0.75 |
| DNASE2          | Deoxyribonuclease Ii, Lysosomal                                                             | -2.22 | 0.90 |
| TAGLN2          | Transgelin 2                                                                                | -2.22 | 0.89 |
| BE926212        | -                                                                                           | -2.21 | 0.87 |
| SLA             | Src-Like-Adaptor                                                                            | -2.21 | 0.80 |
| DHCR24          | 24-Dehydrocholesterol Reductase                                                             | -2.21 | 0.82 |
| ANGPTL4         | Angiopoietin-Like 4                                                                         | -2.21 | 0.82 |
| IMPA3           | cDNA FLJ33669 fis, clone BRAMY2028740                                                       | -2.21 | 0.88 |
| RHEB            | Ras Homolog Enriched In Brain                                                               | -2.21 | 0.90 |
| TUBA6           | Tubulin, Alpha, Ubiquitous                                                                  | -2.21 | 0.82 |
| SQSTM1          | Sequestosome 1                                                                              | -2.21 | 0.86 |
| SLC15A3         | Solute Carrier Family 15, Member 3                                                          | -2.21 | 0.82 |
| CENTA2          | Centaurin, Alpha 2                                                                          | -2.20 | 0.80 |
| PRDX1           | Peroxiredoxin 1                                                                             | -2.20 | 0.90 |
| MAF             | V-Maf Musculoaponeurotic Fibrosarcoma Oncogene Homolog (Avian)                              | -2.20 | 0.86 |

|              |                                                                                                                        |       |      |
|--------------|------------------------------------------------------------------------------------------------------------------------|-------|------|
| IQGAP2       | Iq Motif Containing Gtpase Activating Protein 2                                                                        | -2.20 | 0.85 |
| TPARL        | Tpa Regulated Locus                                                                                                    | -2.20 | 0.90 |
| PEA15        | Phosphoprotein Enriched In Astrocytes 15                                                                               | -2.19 | 0.88 |
| GP9          | Glycoprotein Ix (Platelet)                                                                                             | -2.19 | 0.90 |
| A_24_P631993 | -                                                                                                                      | -2.19 | 0.84 |
| ADFP         | Adipose Differentiation-Related Protein                                                                                | -2.19 | 0.85 |
| CD97         | Cd97 Antigen                                                                                                           | -2.18 | 0.89 |
| HLA-DQB1     | Major Histocompatibility Complex, Class Ii, Dq Beta 1                                                                  | -2.18 | 0.85 |
| CAP1         | Cap, Adenylate Cyclase-Associated Protein 1 (Yeast)                                                                    | -2.18 | 0.88 |
| M160         | CD163 antigen-like 1                                                                                                   | -2.18 | 0.85 |
| SRPRB        | Signal Recognition Particle Receptor, B Subunit                                                                        | -2.18 | 0.89 |
| ADAM9        | Adam Metallopeptidase Domain 9 (Meltrin Gamma)                                                                         | -2.18 | 0.85 |
| UCHL3        | Ubiquitin Carboxyl-Terminal Esterase L3 (Ubiquitin Thiolyesterase)                                                     | -2.18 | 0.91 |
| TXN          | Thioredoxin                                                                                                            | -2.17 | 0.89 |
| AKR1C1       | Aldo-Keto Reductase Family 1, Member C1 (Dihydrodiol Dehydrogenase 1; 20-Alpha (3-Alpha)-Hydroxysteroid Dehydrogenase) | -2.17 | 0.87 |
| ODC1         | Ornithine Decarboxylase 1                                                                                              | -2.17 | 0.92 |
| AES          | Amino-Terminal Enhancer Of Split                                                                                       | -2.17 | 0.88 |
| C1orf85      | Chromosome 1 Open Reading Frame 85                                                                                     | -2.17 | 0.91 |
| THC2371907   | -                                                                                                                      | -2.17 | 0.89 |
| SURB7        | Srb7 Suppressor Of Rna Polymerase B Homolog (Yeast)                                                                    | -2.17 | 0.91 |
| WDR1         | Wd Repeat Domain 1                                                                                                     | -2.17 | 0.88 |
| RDH5         | Retinol Dehydrogenase 5 (11-Cis And 9-Cis)                                                                             | -2.17 | 0.86 |
| DC2          | Dc2 Protein                                                                                                            | -2.16 | 0.88 |
| HLA-DPA1     | Major Histocompatibility Complex, Class Ii, Dp Alpha 1                                                                 | -2.16 | 0.86 |
| HSD11B1      | Hydroxysteroid (11-Beta) Dehydrogenase 1                                                                               | -2.15 | 0.80 |
| CAPG         | Capping Protein (Actin Filament), Gelsolin-Like                                                                        | -2.15 | 0.78 |
| CA414006     | -                                                                                                                      | -2.15 | 0.88 |
| pp9099       | -                                                                                                                      | -2.15 | 0.82 |
| THC2280549   | -                                                                                                                      | -2.14 | 0.90 |
| A_24_P255786 | -                                                                                                                      | -2.14 | 0.85 |
| OGFRL1       | Opioid Growth Factor Receptor-Like 1                                                                                   | -2.14 | 0.89 |
| SEC61G       | Sec61 Gamma Subunit                                                                                                    | -2.14 | 0.91 |
| LILRA6       | Leukocyte Immunoglobulin-Like Receptor, Subfamily A (With Tm Domain), Member 6                                         | -2.14 | 0.85 |
| ARPC2        | Actin Related Protein 2/3 Complex, Subunit 2, 34kda                                                                    | -2.14 | 0.90 |
| BAG3         | Bcl2-Associated Athanogene 3                                                                                           | -2.13 | 0.90 |
| HSPB8        | Heat Shock 22kda Protein 8                                                                                             | -2.13 | 0.86 |
| A_32_P113533 | -                                                                                                                      | -2.13 | 0.85 |
| FCGR2A       | Fc Fragment Of Igg, Low Affinity Iia, Receptor (Cd32)                                                                  | -2.13 | 0.84 |
| PKM2         | Pyruvate Kinase, Muscle                                                                                                | -2.13 | 0.81 |
| LOC201895    | Hypothetical Protein Loc201895                                                                                         | -2.13 | 0.88 |
| AJ294733     | -                                                                                                                      | -2.12 | 0.87 |

|                 |                                                                                        |       |      |
|-----------------|----------------------------------------------------------------------------------------|-------|------|
| CCT5            | Chaperonin Containing Tcp1, Subunit 5 (Epsilon)                                        | -2.12 | 0.93 |
| MOPT            | MORN repeat containing 2                                                               | -2.12 | 0.92 |
| AK024680        | -                                                                                      | -2.12 | 0.83 |
| IL10RB          | Interleukin 10 Receptor, Beta                                                          | -2.12 | 0.92 |
| LOC402418       | -                                                                                      | -2.12 | 0.86 |
| ENST00000355670 | -                                                                                      | -2.12 | 0.85 |
| ITGAV           | Integrin, Alpha V (Vitronectin Receptor, Alpha Polypeptide, Antigen Cd51)              | -2.12 | 0.87 |
| MGAT4A          | Mannosyl (Alpha-1,3-)-Glycoprotein Beta-1,4-N-Acetylglucosaminyltransferase, Isozyme A | -2.11 | 0.90 |
| PPIL1           | Peptidylprolyl Isomerase (Cyclophilin)-Like 1                                          | -2.11 | 0.88 |
| FKSG30          | Actin-Like Protein                                                                     | -2.11 | 0.85 |
| AX721087        | -                                                                                      | -2.10 | 0.83 |
| MRPL14          | Mitochondrial Ribosomal Protein L14                                                    | -2.10 | 0.92 |
| ARL1            | Adp-Ribosylation Factor-Like 1                                                         | -2.10 | 0.91 |
| ATP1A3          | Atpase, Na <sup>+</sup> /K <sup>+</sup> Transporting, Alpha 3 Polypeptide              | -2.10 | 0.89 |
| ZCSL2           | Zinc Finger, Csl-Type Containing 2                                                     | -2.10 | 0.90 |
| PYCARD          | Pyd And Card Domain Containing                                                         | -2.10 | 0.86 |
| ALDH1A3         | Aldehyde Dehydrogenase 1 Family, Member A3                                             | -2.10 | 0.83 |
| RNF14           | Ring Finger Protein 14                                                                 | -2.09 | 0.90 |
| LOC440731       | Hypothetical Loc440731                                                                 | -2.09 | 0.91 |
| CYBASC3         | Cytochrome B, Ascorbate Dependent 3                                                    | -2.09 | 0.87 |
| IL4I1           | Interleukin 4 Induced 1                                                                | -2.09 | 0.74 |
| ATP6AP1         | Atpase, H <sup>+</sup> Transporting, Lysosomal Accessory Protein 1                     | -2.09 | 0.85 |
| SEP15           | -                                                                                      | -2.09 | 0.87 |
| C20orf35        | Chromosome 20 Open Reading Frame 35                                                    | -2.09 | 0.90 |
| GPBAR1          | G Protein-Coupled Bile Acid Receptor 1                                                 | -2.08 | 0.88 |
| AL122093        | -                                                                                      | -2.08 | 0.85 |
| EIF3S1          | Eukaryotic Translation Initiation Factor 3, Subunit 1 Alpha, 35kda                     | -2.08 | 0.92 |
| GK001           | Coiled-coil domain containing 47                                                       | -2.08 | 0.89 |
| MGAT1           | Mannosyl (Alpha-1,3-)-Glycoprotein Beta-1,2-N-Acetylglucosaminyltransferase            | -2.08 | 0.88 |
| CYP1B1          | Cytochrome P450, Family 1, Subfamily B, Polypeptide 1                                  | -2.08 | 0.86 |
| PIGK            | Phosphatidylinositol Glycan, Class K                                                   | -2.08 | 0.88 |
| ATP6AP2         | Atpase, H <sup>+</sup> Transporting, Lysosomal Accessory Protein 2                     | -2.07 | 0.87 |
| A_24_P161393    | -                                                                                      | -2.07 | 0.85 |
| IRAK1           | Interleukin-1 Receptor-Associated Kinase 1                                             | -2.07 | 0.84 |
| CD83            | Cd83 Antigen (Activated B Lymphocytes, Immunoglobulin Superfamily)                     | -2.07 | 0.79 |
| COL5A1          | Collagen, Type V, Alpha 1                                                              | -2.07 | 0.86 |
| TUBB2           | Tubulin, beta 2A                                                                       | -2.06 | 0.85 |
| FLJ20718        | Hypothetical Protein Flj20718                                                          | -2.06 | 0.86 |
| ANXA5           | Annexin A5                                                                             | -2.06 | 0.87 |
| TNMD            | Tenomodulin                                                                            | -2.06 | 0.77 |
| ZNF655          | Zinc Finger Protein 655                                                                | -2.06 | 0.92 |

|                 |                                                                                  |       |      |
|-----------------|----------------------------------------------------------------------------------|-------|------|
| MTHFD1L         | Methylenetetrahydrofolate Dehydrogenase (Nadp+ Dependent) 1-Like                 | -2.06 | 0.92 |
| TAF10           | Taf10 Rna Polymerase Ii, Tata Box Binding Protein (Tbp)-Associated Factor, 30kda | -2.06 | 0.90 |
| HLA-DQA2        | Major Histocompatibility Complex, Class Ii, Dq Alpha 1                           | -2.06 | 0.86 |
| BZW1            | Basic Leucine Zipper And W2 Domains 1                                            | -2.06 | 0.90 |
| PDE4DIP         | Phosphodiesterase 4d Interacting Protein (Myomegalin)                            | -2.06 | 0.88 |
| C9orf105        | Chromosome 9 Open Reading Frame 105                                              | -2.06 | 0.92 |
| M6PR            | Mannose-6-Phosphate Receptor (Cation Dependent)                                  | -2.06 | 0.92 |
| FTHL7           | Ferritin, Heavy Polypeptide-Like 7                                               | -2.06 | 0.90 |
| PKM2            | Pyruvate Kinase, Muscle                                                          | -2.05 | 0.83 |
| LOC441168       | -                                                                                | -2.04 | 0.88 |
| MYO1E           | Myosin Ie                                                                        | -2.04 | 0.90 |
| ENST00000303246 | -                                                                                | -2.04 | 0.89 |
| ZMPSTE24        | Zinc Metallopeptidase (Ste24 Homolog, Yeast)                                     | -2.04 | 0.90 |
| HIST1H1C        | Histone 1, H1c                                                                   | -2.03 | 0.80 |
| CCT2            | Chaperonin Containing Tcp1, Subunit 2 (Beta)                                     | -2.03 | 0.92 |
| SULT1A1         | Sulfotransferase Family, Cytosolic, 1a, Phenol-Preferring, Member 1              | -2.03 | 0.88 |
| SGCB            | Sarcoglycan, Beta (43kda Dystrophin-Associated Glycoprotein)                     | -2.02 | 0.90 |
| MYD88           | Myeloid Differentiation Primary Response Gene (88)                               | -2.02 | 0.87 |
| SRPX2           | Sushi-Repeat-Containing Protein, X-Linked 2                                      | -2.02 | 0.83 |
| FLJ22833        | -                                                                                | -2.02 | 0.83 |
| A_24_P32735     | -                                                                                | -2.02 | 0.87 |
| A_24_P929650    | -                                                                                | -2.02 | 0.85 |
| PLD3            | Phospholipase D Family, Member 3                                                 | -2.02 | 0.83 |
| C9orf80         | Chromosome 9 Open Reading Frame 80                                               | -2.01 | 0.90 |
| ATP5J2          | Atp Synthase, H+ Transporting, Mitochondrial F0 Complex, Subunit F2              | -2.01 | 0.89 |
| RAB35           | Rab35, Member Ras Oncogene Family                                                | -2.01 | 0.91 |
| SERF2           | Small Edrk-Rich Factor 2                                                         | -2.00 | 0.89 |
| GM2A            | Gm2 Ganglioside Activator                                                        | -2.00 | 0.83 |
| C2orf7          | Chromosome 2 Open Reading Frame 7                                                | -2.00 | 0.92 |
| BOLA2           | Bola-Like 2 (E. Coli)                                                            | -2.00 | 0.90 |
| SAT             | Spermidine/Spermine N1-Acetyltransferase                                         | -2.00 | 0.87 |
| UBL5            | Ubiquitin-Like 5                                                                 | -2.00 | 0.92 |
| SCCPDH          | Saccharopine Dehydrogenase (Putative)                                            | -2.00 | 0.90 |
| TUBB4           | Tubulin, Beta 4                                                                  | -2.00 | 0.87 |
| LOC92482        | Hypothetical Protein Loc92482                                                    | -1.99 | 0.91 |
| HIG1            | HIG1 domain family, member 1A                                                    | -1.99 | 0.88 |
| HLA-DPA1        | Major Histocompatibility Complex, Class Ii, Dp Alpha 1                           | -1.99 | 0.88 |
| PIGF            | Phosphatidylinositol Glycan, Class F                                             | -1.99 | 0.91 |
| CGI-116         | -                                                                                | -1.99 | 0.93 |
| A_24_P58607     | -                                                                                | -1.98 | 0.93 |
| FLJ20186        | Hypothetical Protein Flj20186                                                    | -1.98 | 0.92 |

|                 |                                                                                   |       |      |
|-----------------|-----------------------------------------------------------------------------------|-------|------|
| LSP1            | Lymphocyte-Specific Protein 1                                                     | -1.98 | 0.83 |
| PPIA            | Peptidylprolyl Isomerase A (Cyclophilin A)                                        | -1.97 | 0.90 |
| PX19            | Px19-Like Protein                                                                 | -1.97 | 0.91 |
| LCP2            | Lymphocyte Cytosolic Protein 2 (Sh2 Domain Containing Leukocyte Protein Of 76kda) | -1.97 | 0.90 |
| INSIG1          | Insulin Induced Gene 1                                                            | -1.97 | 0.87 |
| LOC388135       | Similar To Riken Cdna 6030419c18 Gene                                             | -1.96 | 0.88 |
| KSP37           | Ksp37 Protein                                                                     | -1.96 | 0.90 |
| TLE2            | Transducin-Like Enhancer Of Split 2 (E(Sp1) Homolog, Drosophila)                  | -1.96 | 0.88 |
| TPM3            | Tropomyosin 3                                                                     | -1.95 | 0.91 |
| OTUB1           | Otu Domain, Ubiquitin Aldehyde Binding 1                                          | -1.95 | 0.92 |
| RABEP1          | Rabaptin, Rab Gtpase Binding Effector Protein 1                                   | -1.95 | 0.93 |
| BST1            | Bone Marrow Stromal Cell Antigen 1                                                | -1.95 | 0.89 |
| PLAU            | Plasminogen Activator, Urokinase                                                  | -1.95 | 0.85 |
| KIAA1949        | Kiaa1949                                                                          | -1.95 | 0.89 |
| SEC23B          | Sec23 Homolog B (S. Cerevisiae)                                                   | -1.95 | 0.90 |
| TMP21           | Transmembrane emp24-like trafficking protein 10 (yeast)                           | -1.94 | 0.89 |
| ZNF219          | Zinc Finger Protein 219                                                           | -1.94 | 0.87 |
| TXNL1           | Thioredoxin-Like 1                                                                | -1.94 | 0.93 |
| RP2             | Retinitis Pigmentosa 2 (X-Linked Recessive)                                       | -1.94 | 0.83 |
| CNKSR3          | Cnksr Family Member 3                                                             | -1.94 | 0.87 |
| ENST00000327665 | -                                                                                 | -1.93 | 0.88 |
| ARHGAP4         | Rho Gtpase Activating Protein 4                                                   | -1.93 | 0.86 |
| HLA-DPB1        | Major Histocompatibility Complex, Class Ii, Dp Beta 1                             | -1.93 | 0.87 |
| ACTG1           | Actin, Beta                                                                       | -1.93 | 0.85 |
| MGC2941         | PHD finger protein 23                                                             | -1.93 | 0.91 |
| TXNL2           | Thioredoxin-Like 2                                                                | -1.93 | 0.93 |
| A_23_P58072     | -                                                                                 | -1.93 | 0.91 |
| PITPNA          | Phosphatidylinositol Transfer Protein, Alpha                                      | -1.92 | 0.92 |
| UBQLN1          | Ubiquilin 1                                                                       | -1.92 | 0.92 |
| LAIR1           | Leukocyte-Associated Ig-Like Receptor 1                                           | -1.92 | 0.87 |

***Dietary Intervention (DI)***

***Up Regulated Genes***

|            |                                                                                              |      |      |
|------------|----------------------------------------------------------------------------------------------|------|------|
| THC2374684 | -                                                                                            | 5.18 | 1.22 |
| SLC7A10    | Hypothetical Protein Flj20839                                                                | 4.50 | 1.26 |
| GLUL       | Glutamate-Ammonia Ligase (Glutamine Synthetase)                                              | 4.10 | 1.42 |
| NFIA       | Nuclear Factor I/A                                                                           | 3.96 | 1.23 |
| PTPN13     | Protein Tyrosine Phosphatase, Non-Receptor Type 13 (Apo-1/Cd95 (Fas)-Associated Phosphatase) | 3.86 | 1.17 |
| THC2305303 | -                                                                                            | 3.82 | 1.19 |
| TWIST1     | Twist Homolog 1 (Acrocephalosyndactyly 3; Saethre-Chotzen Syndrome) (Drosophila)             | 3.77 | 1.22 |
| HIG2       | Hypoxia-Inducible Protein 2                                                                  | 3.76 | 1.22 |
| THC2389705 | -                                                                                            | 3.74 | 1.38 |

|                 |                                                                                 |      |      |
|-----------------|---------------------------------------------------------------------------------|------|------|
| HLF             | Hepatic Leukemia Factor                                                         | 3.73 | 1.24 |
| ADH1B           | Alcohol Dehydrogenase 1a (Class I), Alpha Polypeptide                           | 3.52 | 1.34 |
| TF              | Transferrin                                                                     | 3.49 | 1.25 |
| KIAA0657        | -                                                                               | 3.48 | 1.21 |
| ZBTB20          | Zinc Finger And Btb Domain Containing 20                                        | 3.47 | 1.48 |
| ANG             | Angiogenin, Ribonuclease, Rnase A Family, 5                                     | 3.46 | 1.20 |
| TF              | Transferrin                                                                     | 3.45 | 1.32 |
| AHCTF1          | At Hook Containing Transcription Factor 1                                       | 3.44 | 1.15 |
| FIGF            | C-Fos Induced Growth Factor (Vascular Endothelial Growth Factor D)              | 3.44 | 1.21 |
| ENST00000315208 | -                                                                               | 3.40 | 1.21 |
| LOC440234       | -                                                                               | 3.33 | 1.34 |
| THC2315024      | -                                                                               | 3.30 | 1.33 |
| ZNF395          | Hypothetical Protein Dkfzp434k1210                                              | 3.30 | 1.19 |
| BC016022        | -                                                                               | 3.27 | 1.40 |
| EIF4B           | Eukaryotic Translation Initiation Factor 4b                                     | 3.26 | 1.20 |
| EBF             | Early B-Cell Factor                                                             | 3.25 | 1.21 |
| SNTB2           | Syntrophin, Beta 2 (Dystrophin-Associated Protein A1, 59kda, Basic Component 2) | 3.23 | 1.18 |
| GPD1L           | Glycerol-3-Phosphate Dehydrogenase 1-Like                                       | 3.22 | 1.27 |
| GNG7            | Guanine Nucleotide Binding Protein (G Protein), Gamma 7                         | 3.19 | 1.17 |
| PPAP2B          | Phosphatidic Acid Phosphatase Type 2b                                           | 3.18 | 1.30 |
| LGI4            | Leucine-Rich Repeat Lgi Family, Member 4                                        | 3.16 | 1.16 |
| KIAA0485        | Kiaa0485 Protein                                                                | 3.15 | 1.50 |
| AK022045        | -                                                                               | 3.14 | 1.74 |
| EBF3            | Early B-Cell Factor 3                                                           | 3.14 | 1.20 |
| AFF1            | Af4/Fmr2 Family, Member 1                                                       | 3.13 | 1.23 |
| ADSSL1          | Adenylosuccinate Synthase Like 1                                                | 3.10 | 1.32 |
| PHIP            | Pleckstrin Homology Domain Interacting Protein                                  | 3.09 | 1.21 |
| TNN             | Tenascin N                                                                      | 3.08 | 1.31 |
| RAI2            | Retinoic Acid Induced 2                                                         | 3.08 | 1.26 |
| MYCBP2          | Myc Binding Protein 2                                                           | 3.08 | 1.20 |
| A_24_P212997    | -                                                                               | 3.06 | 1.22 |
| LRIG1           | Leucine-Rich Repeats And Immunoglobulin-Like Domains 1                          | 3.05 | 1.21 |
| BC023570        | -                                                                               | 3.04 | 1.13 |
| USP48           | Hypothetical Protein Flj11328                                                   | 3.01 | 1.13 |
| RGS22           | Regulator Of G-Protein Signalling 22                                            | 3.00 | 1.17 |
| ENST00000325055 | -                                                                               | 2.95 | 1.29 |
| ALMS1           | Alstrom Syndrome 1                                                              | 2.93 | 1.12 |
| MGC39325        | -                                                                               | 2.91 | 1.15 |
| AK055214        | -                                                                               | 2.90 | 1.20 |
| SFRS5           | Splicing Factor, Arginine/Serine-Rich 5                                         | 2.87 | 1.29 |
| ENST00000244221 | -                                                                               | 2.86 | 1.17 |
| SPPL3           | Signal peptide peptidase 3                                                      | 2.85 | 1.13 |
| DAPK2           | Death-Associated Protein Kinase 2                                               | 2.84 | 1.24 |

|                 |                                                                                                   |      |      |
|-----------------|---------------------------------------------------------------------------------------------------|------|------|
| S100PBPR        | S100P binding protein                                                                             | 2.80 | 1.14 |
| LOC90799        | -                                                                                                 | 2.78 | 1.20 |
| FAM13A1         | Family With Sequence Similarity 13, Member A1                                                     | 2.76 | 1.30 |
| AK022044        | -                                                                                                 | 2.76 | 1.34 |
| THRAP2          | Thyroid Hormone Receptor Associated Protein 2                                                     | 2.75 | 1.18 |
| AF321617        | -                                                                                                 | 2.75 | 1.14 |
| RPS6KA5         | Ribosomal Protein S6 Kinase, 90kda, Polypeptide 5                                                 | 2.75 | 1.12 |
| ZBTB16          | Zinc Finger And Btb Domain Containing 16                                                          | 2.74 | 1.25 |
| ZNF395          | Hypothetical Protein Dkfzp434k1210                                                                | 2.72 | 1.18 |
| HOXA5           | Homeobox A5                                                                                       | 2.71 | 1.19 |
| GPRASP1         | G Protein-Coupled Receptor Associated Sorting Protein 1                                           | 2.71 | 1.19 |
| INE1            | Inactivation Escape 1                                                                             | 2.70 | 1.27 |
| AK021980        | -                                                                                                 | 2.70 | 1.26 |
| HOXA3           | Homeobox A3                                                                                       | 2.69 | 1.19 |
| BC018597        | -                                                                                                 | 2.69 | 1.22 |
| CR619603        | -                                                                                                 | 2.69 | 1.17 |
| ZC3H6           | Zinc Finger Ccch-Type Containing 6                                                                | 2.67 | 1.19 |
| CKLFSF8         | CKLF-like MARVEL transmembrane domain containing 8                                                | 2.67 | 1.16 |
| THC2436690      | -                                                                                                 | 2.66 | 1.19 |
| AF087999        | -                                                                                                 | 2.66 | 1.21 |
| PNMA3           | Paraneoplastic Antigen Ma3                                                                        | 2.66 | 1.18 |
| LOC388466       | -                                                                                                 | 2.66 | 1.27 |
| A_24_P332292    | -                                                                                                 | 2.65 | 1.17 |
| PFKFB3          | 6-Phosphofructo-2-Kinase/Fructose-2,6-Biphosphatase 3                                             | 2.64 | 1.20 |
| MAP3K4          | Mitogen-Activated Protein Kinase Kinase Kinase 4                                                  | 2.64 | 1.12 |
| TJP1            | Tight Junction Protein 1 (Zona Occludens 1)                                                       | 2.63 | 1.21 |
| LOC157562       | Hypothetical Protein Loc157562                                                                    | 2.61 | 1.15 |
| BAZ2A           | Bromodomain Adjacent To Zinc Finger Domain, 2a                                                    | 2.61 | 1.12 |
| MLL             | Myeloid/Lymphoid Or Mixed-Lineage Leukemia (Trithorax Homolog, Drosophila)                        | 2.60 | 1.27 |
| FOXJ3           | Forkhead Box J3                                                                                   | 2.58 | 1.14 |
| EBF3            | Early B-Cell Factor 3                                                                             | 2.57 | 1.21 |
| ENST00000262795 | -                                                                                                 | 2.57 | 1.30 |
| DCP1B           | Dcp1 Decapping Enzyme Homolog B (S. Cerevisiae)                                                   | 2.56 | 1.13 |
| C1orf115        | Chromosome 1 Open Reading Frame 115                                                               | 2.55 | 1.11 |
| AZGP1           | Alpha-2-Glycoprotein 1, Zinc                                                                      | 2.54 | 1.26 |
| NRIP1           | Nuclear Receptor Interacting Protein 1                                                            | 2.54 | 1.23 |
| LOC283487       | Hypothetical Protein Loc283487                                                                    | 2.52 | 1.33 |
| PARD3           | Par-3 Partitioning Defective 3 Homolog (C. Elegans)                                               | 2.49 | 1.10 |
| SMARCC2         | Swi/Snf Related, Matrix Associated, Actin Dependent Regulator Of Chromatin, Subfamily C, Member 2 | 2.48 | 1.17 |
| NEK3            | Nima (Never In Mitosis Gene A)-Related Kinase 3                                                   | 2.47 | 1.19 |



**Supplementary Table A2:** Validation of microarray gene expression data by reverse transcription-quantitative PCR (RT-qPCR)

| Gene symbol | Gene name                                                                                     | Microarray (n=8) |                |               | RT-qPCR (n=15-22) |               |               |
|-------------|-----------------------------------------------------------------------------------------------|------------------|----------------|---------------|-------------------|---------------|---------------|
|             |                                                                                               | ER               | WS             | DI            | ER                | WS            | DI            |
| Adipocytes  |                                                                                               |                  |                |               |                   |               |               |
| ANGPTL4     | Angiopoietin-like 4                                                                           | 1.28 ± 0.04 *    | 0.63 ± 0.06 *  | 0.82 ± 0.07 * | 1.29 ± 0.10 *     | 0.76 ± 0.09   | 0.94 ± 0.12   |
| AZGP1       | Alpha-2-glycoprotein 1, zinc                                                                  | 0.94 ± 0.02      | 1.36 ± 0.11 *  | 1.25 ± 0.08 * | 0.94 ± 0.11       | 1.38 ± 0.19   | 1.21 ± 0.15   |
| CES1        | Carboxylesterase 1                                                                            | 0.70 ± 0.05 *    | 1.08 ± 0.11    | 0.75 ± 0.06 * | 0.68 ± 0.05 *     | 1.31 ± 0.13   | 0.85 ± 0.08 * |
| HP          | Haptoglobin                                                                                   | 0.37 ± 0.09 *    | 2.70 ± 0.70 *  | 0.79 ± 0.18   | 0.40 ± 0.09 *     | 3.31 ± 0.96 * | 0.86 ± 0.22   |
| IGF1        | Insulin-like growth factor 1                                                                  | 0.86 ± 0.04 *    | 1.42 ± 0.10 *  | 1.23 ± 0.11   | 0.75 ± 0.09 *     | 1.49 ± 0.22   | 1.12 ± 0.26   |
| IRS1        | Insulin receptor substrate 1                                                                  | 0.83 ± 0.06 *    | 1.45 ± 0.08 *  | 1.20 ± 0.11   | 0.69 ± 0.09 *     | 1.88 ± 0.40 * | 1.28 ± 0.31   |
| THBS1       | Thrombospondin 1                                                                              | 1.2 ± 0.07       | 0.72 ± 0.06 *  | 0.91 ± 0.12   | 1.22 ± 0.12       | 0.66 ± 0.09 * | 0.75 ± 0.10 * |
| Macrophages |                                                                                               |                  |                |               |                   |               |               |
| ACP5        | Acid phosphatase 5, tartrate resistant                                                        | 1.87 ± 0.33      | 0.32 ± 0.039 * | 0.63 ± 0.12   | 3.42 ± 0.88 *     | 0.3 ± 0.06 *  | 0.65 ± 0.09 * |
| CD68        | CD68 molecule                                                                                 | 1.21 ± 0.11      | 0.59 ± 0.047 * | 0.72 ± 0.08 * | 2.16 ± 0.45 *     | 0.46 ± 0.06 * | 0.71 ± 0.06 * |
| FCGBP       | Fc fragment of IgG binding protein                                                            | 1.62 ± 0.26      | 0.54 ± 0.172 * | 0.62 ± 0.08 * | 2.57 ± 0.44 *     | 0.29 ± 0.07 * | 0.53 ± 0.08 * |
| LIPA        | Lipase A, lysosomal acid, cholesterol esterase (Wolman disease)                               | 1.51 ± 0.23      | 0.45 ± 0.039 * | 0.64 ± 0.08 * | 2.18 ± 0.36 *     | 0.45 ± 0.06 * | 0.73 ± 0.06 * |
| MSR1        | Macrophage scavenger receptor 1                                                               | 1.12 ± 0.07      | 0.63 ± 0.053   | 0.72 ± 0.07 * | 2.46 ± 0.56 *     | 0.35 ± 0.06 * | 0.58 ± 0.08 * |
| PLA2G7      | Phospholipase A2, group VII (platelet-activating factor acetylhydrolase, plasma)              | 1.55 ± 0.25      | 0.43 ± 0.073 * | 0.54 ± 0.08 * | 3.9 ± 1.11 *      | 0.31 ± 0.09 * | 0.64 ± 0.12 * |
| SPP1        | Secreted phosphoprotein 1 (osteopontin, bone sialoprotein I, early T-lymphocyte activation 1) | 1.73 ± 0.36      | 0.38 ± 0.147 * | 0.45 ± 0.09 * | 4.43 ± 1.44 *     | 0.24 ± 0.05 * | 0.54 ± 0.08 * |
| CCRL2       | Chemokine (C-C motif) receptor-like 2                                                         | 1.11 ± 0.07      | 0.84 ± 0.032 * | 0.85 ± 0.04 * | 1.57 ± 0.19 *     | 0.73 ± 0.08 * | 0.94 ± 0.07 * |
| CD163       | CD163 molecule                                                                                | 1.15 ± 0.09      | 0.59 ± 0.056 * | 0.65 ± 0.08 * | 1.47 ± 0.23 *     | 0.57 ± 0.06 * | 0.68 ± 0.05 * |
| CD33        | CD33 molecule                                                                                 | 1.06 ± 0.05      | 0.83 ± 0.041 * | 0.88 ± 0.02 * | 1.69 ± 0.24 *     | 0.51 ± 0.16 * | 0.66 ± 0.11 * |
| FCGR2B      | Fc fragment of IgG, low affinity IIb, receptor (CD32)                                         | 1 ± 0.06         | 0.75 ± 0.05 *  | 0.74 ± 0.05 * | 1.37 ± 0.15 *     | 0.66 ± 0.08 * | 0.77 ± 0.06 * |
| IRF5        | Interferon regulatory factor 5                                                                | 1.08 ± 0.06      | 0.73 ± 0.036 * | 0.78 ± 0.05 * | 1.52 ± 0.21 *     | 0.57 ± 0.05 * | 0.74 ± 0.05 * |
| KYNU        | Kynureninase (L-kynurenine hydrolase)                                                         | 1.03 ± 0.09      | 0.7 ± 0.028 *  | 0.72 ± 0.07 * | 1.82 ± 0.26 *     | 0.48 ± 0.06 * | 0.71 ± 0.07 * |
| MS4A4A      | Membrane-spanning 4-domains, subfamily A, member 4                                            | 1.11 ± 0.09      | 0.62 ± 0.061 * | 0.7 ± 0.08 *  | 1.53 ± 0.28 *     | 0.59 ± 0.11 * | 0.7 ± 0.08 *  |
| MS4A7       | Membrane-spanning 4-domains, subfamily A, member 7                                            | 1.16 ± 0.12      | 0.68 ± 0.054 * | 0.72 ± 0.07 * | 1.72 ± 0.26 *     | 0.52 ± 0.06 * | 0.72 ± 0.07 * |
| SLCO2B1     | Solute carrier organic anion transporter family, member 2B1                                   | 1.14 ± 0.1       | 0.68 ± 0.069 * | 0.72 ± 0.06 * | 1.64 ± 0.21 *     | 0.51 ± 0.06 * | 0.7 ± 0.07 *  |
| CD14        | CD14 molecule                                                                                 | 0.98 ± 0.09      | 0.76 ± 0.052 * | 0.73 ± 0.06 * | 1.36 ± 0.15 *     | 0.62 ± 0.05 * | 0.75 ± 0.05 * |
| CD209       | CD209 molecule                                                                                | 0.97 ± 0.07      | 0.92 ± 0.041   | 0.83 ± 0.05 * | 1.37 ± 0.14 *     | 0.65 ± 0.06 * | 0.78 ± 0.07 * |

|         |                                                                    |                                        |                |               |               |               |               |
|---------|--------------------------------------------------------------------|----------------------------------------|----------------|---------------|---------------|---------------|---------------|
| CENTA2  | Centaurin, alpha 2                                                 | 1.05 ± 0.06                            | 0.8 ± 0.069 *  | 0.82 ± 0.07 * | 1.36 ± 0.16 * | 0.67 ± 0.06 * | 0.77 ± 0.05 * |
| CLEC10A | C-type lectin domain family 10, member A                           | 0.96 ± 0.07                            | 0.87 ± 0.061   | 0.81 ± 0.07   | 1.19 ± 0.14 * | 0.76 ± 0.08 * | 0.81 ± 0.08 * |
| CTSS    | Cathepsin S                                                        | 1.21 ± 0.09                            | 0.62 ± 0.04 *  | 0.76 ± 0.08 * | 1.26 ± 0.13   | 0.62 ± 0.09 * | 0.71 ± 0.08 * |
| GATM    | Glycine amidinotransferase (L-arginine:glycine amidinotransferase) | 1.08 ± 0.05                            | 0.76 ± 0.029 * | 0.83 ± 0.04 * | 1.33 ± 0.13 * | 0.68 ± 0.06 * | 0.8 ± 0.04 *  |
| HLA-DMA | major histocompatibility complex, class II, DM alpha               | 1.04 ± 0.05                            | 0.85 ± 0.034 * | 0.86 ± 0.03 * | 1.26 ± 0.08 * | 0.8 ± 0.06 *  | 0.95 ± 0.06 * |
| HLA-DMB | Major histocompatibility complex, class II, DM B                   | 1.08 ± 0.04                            | 0.76 ± 0.04 *  | 0.84 ± 0.06 * | 1.11 ± 0.11   | 0.70 ± 0.11 * | 0.75 ± 0.13   |
| HLA-DRA | major histocompatibility complex, class II, DR alpha               | 1.08 ± 0.04                            | 0.76 ± 0.039 * | 0.83 ± 0.06   | 1.25 ± 0.09 * | 0.78 ± 0.06 * | 0.91 ± 0.06 * |
| MARCO   | Macrophage receptor with collagenous structure                     | 0.95 ± 0.14                            | 0.76 ± 0.096   | 0.63 ± 0.08 * | 1.29 ± 0.14 * | 0.54 ± 0.06 * | 0.65 ± 0.1 *  |
| MS4A6A  | Membrane-spanning 4-domains, subfamily A, member 6A                | 1.04 ± 0.08                            | 0.74 ± 0.047 * | 0.77 ± 0.05 * | 1.34 ± 0.17 * | 0.64 ± 0.06 * | 0.74 ± 0.06 * |
| TLR7    | Toll-like receptor 7                                               | 0.98 ± 0.03                            | 0.91 ± 0.023   | 0.86 ± 0.03   | 1.35 ± 0.2 *  | 0.73 ± 0.08 * | 0.83 ± 0.08 * |
| FCN1    | Ficolin (collagen/fibrinogen domain containing) 1                  | 0.85 ± 0.07 *                          | 1.21 ± 0.156   | 1.05 ± 0.16   | 1.13 ± 0.14   | 1.54 ± 0.27   | 1.34 ± 0.19   |
| SNCA    | Synuclein, alpha (non A4 component of amyloid precursor)           | 0.93 ± 0.06                            | 0.98 ± 0.157   | 0.89 ± 0.14   | 1.36 ± 0.2    | 1.64 ± 0.42   | 1.83 ± 0.52   |
|         |                                                                    | Other cell types & no cell specificity |                |               |               |               |               |
| ALOX5AP | Arachidonate 5-lipoxygenase-activating protein                     | 0.97 ± 0.08                            | 0.87 ± 0.05 *  | 0.86 ± 0.09   | 1.05 ± 0.12   | 0.84 ± 0.11 * | 0.83 ± 0.10   |
| FN1     | Fibronectin 1                                                      | 1.00 ± 0.09                            | 0.86 ± 0.07    | 0.84 ± 0.04 * | 1.01 ± 0.12   | 0.99 ± 0.13   | 0.90 ± 0.12 * |
| ITGAX   | Integrin, alpha X (CD11c)                                          | 1.30 ± 0.16                            | 0.62 ± 0.02 *  | 0.78 ± 0.10   | 2.66 ± 0.65 * | 0.72 ± 0.19 * | 1.02 ± 0.2    |
| LOX     | Lysyl oxidase                                                      | 0.80 ± 0.03 *                          | 1.16 ± 0.06    | 0.90 ± 0.03   | 0.68 ± 0.05 * | 1.27 ± 0.14 * | 0.80 ± 0.06 * |
| PLAT    | Plasminogen activator, tissue                                      | 0.90 ± 0.05                            | 1.36 ± 0.14 *  | 1.16 ± 0.09   | 0.76 ± 0.08 * | 1.46 ± 0.2 *  | 1.04 ± 0.12   |
| SOD2    | Superoxide dismutase 2, mitochondrial                              | 0.92 ± 0.07                            | 0.97 ± 0.06    | 0.85 ± 0.03 * | 1.02 ± 0.07   | 0.88 ± 0.11   | 0.84 ± 0.08   |
| S100A8  | S100 calcium binding protein a8                                    | 0.72 ± 0.16 *                          | 2.83 ± 0.91    | 2.12 ± 0.81   | 0.70 ± 0.18 * | 1.88 ± 0.47   | 0.90 ± 0.14   |
| WBSCR14 | MLX interacting protein-like (ChREBP)                              | 0.95 ± 0.06                            | 1.35 ± 0.13 *  | 1.26 ± 0.11   | 0.83 ± 0.07 * | 1.41 ± 0.14   | 1.14 ± 0.12   |

Results are expressed as mean fold change (±S.E.M) during each phase. \* p < 0.05 vs. Basal. The cellular origin of the genes was determined by microarray analysis of gene expression in the different cellular fractions of human AT (see Methods).

**Supplementary Table A3 :** Information on reporter metabolites and metabolic networks

Reporter Metabolite analysis was based on two recently published high-confidence models of human metabolism [1-3]. Based on reconstructions of metabolism, reporter metabolite analysis identifies so-called reporter metabolites, which are metabolites that are surrounded by a significant degree of differential expression in their associated enzymes.

**A:** Selected Reporter Metabolites based on the EHMN (Edinburgh human metabolic network) model of metabolism

| Reporter Metabolite    | ER      |                       |                         | WS      |                       |                         |
|------------------------|---------|-----------------------|-------------------------|---------|-----------------------|-------------------------|
|                        | P-value | # Upregulated Enzymes | # Downregulated Enzymes | P-value | # Upregulated Enzymes | # Downregulated Enzymes |
| Acyl-CoA               | 0,000   | 0                     | 6                       | 0,003   | 4                     | 3                       |
| CoA                    | 0,002   | 6                     | 15                      | 0,004   | 16                    | 9                       |
| NADP+ / NADPH          | 0,020   | 6                     | 16                      | 0,196   | 13                    | 7                       |
| Acetyl-CoA             | 0,035   | 2                     | 10                      | 0,074   | 11                    | 3                       |
| Ubiquinol / ubiquinone | 0,047   | 0                     | 10                      | 0,369   | 12                    | 0                       |

**B:** Selected Reporter Metabolites based on the Recon1 (Global reconstruction of the human metabolic network based on genomic and bibliomic data 1) model of metabolism

| Reporter Metabolite                                  | ER      |                       |                         | WS      |                       |                         |
|------------------------------------------------------|---------|-----------------------|-------------------------|---------|-----------------------|-------------------------|
|                                                      | P-value | # Upregulated Enzymes | # Downregulated Enzymes | P-value | # Upregulated Enzymes | # Downregulated Enzymes |
| Acetyl-CoA (mitochondria)                            | 0,08    | 0                     | 3                       | 0,0214  | 2                     | 1                       |
| Acetyl-CoA (cytosol)                                 | 0,21    | 0                     | 4                       | 0,0394  | 2                     | 2                       |
| CoA (mitochondria)                                   | 0,11    | 1                     | 4                       | 0,0531  | 5                     | 2                       |
| CoA (cytosol)                                        | 0,18    | 2                     | 8                       | 0,0824  | 5                     | 4                       |
| Ubiquinol-10 / ubiquinone-10 (mitochondria)          | 0,05    | 0                     | 12                      | 0,3743  | 13                    | 0                       |
| Ferricytochrome c / ferrocytochrome c (mitochondria) | 0,02    | 0                     | 6                       | 0,2167  | 4                     | 0                       |

**C: Overview of Genes, Reactions, and Metabolites in the Recon1 and EHMN reconstructions**

|               | <b>Genes</b> | <b>Reactions</b> | <b>Metabolites</b> |      |
|---------------|--------------|------------------|--------------------|------|
| <b>EHMN</b>   | <b>ER</b>    | 299              | 701                | 1044 |
|               | <b>WS</b>    | 289              | 673                | 979  |
|               | <b>DI</b>    | 285              | 657                | 965  |
| <b>Recon1</b> | <b>ER</b>    | 156              | 336                | 622  |
|               | <b>WS</b>    | 152              | 333                | 630  |
|               | <b>DI</b>    | 151              | 329                | 616  |

Number of unique genes, reactions, and metabolites in both the EHMN and Recon1 metabolic reconstructions.

**D: EHMN reporter metabolite enzyme neighbours**

| <b>Reporter Metabolite</b>    | <b>ER</b>                       |                                                                                | <b>WS</b>                                                                     |                                              |
|-------------------------------|---------------------------------|--------------------------------------------------------------------------------|-------------------------------------------------------------------------------|----------------------------------------------|
|                               | <b>Upregulated Enzymes</b>      | <b>Downregulated Enzymes</b>                                                   | <b>Upregulated Enzymes</b>                                                    | <b>Downregulated Enzymes</b>                 |
| <b>Acyl-CoA</b>               |                                 | 10249,137964,2181,51,56894,84649                                               | 10249,2181,51,84649                                                           | 137964,56894,6646                            |
| <b>CoA</b>                    | 10724,1387,27349,4836,9397,9517 | 10249,137964,1666,1737,2181,30,3033,38,39,51,55902,56894,6303,84649,9329       | 10249,10724,10965,1666,1737,212,2181,30,3033,38,4967,51,55902,84649,9329,9517 | 137964,211,39,4836,5538,56894,6303,6646,9397 |
| <b>NADP+ / NADPH</b>          | 124,128,1595,2531,260293,4200   | 10327,1645,1666,1719,1737,30,3033,3292,4199,51,51144,60496,6319,7108,8659,9380 | 1645,1666,1719,1737,260293,30,3033,3292,4199,51,6319,7108,9380                | 10327,124,128,2531,29920,60496,8659          |
| <b>Acetyl-CoA</b>             | 10724,1387                      | 1666,1737,30,3033,38,39,51,55902,6303,9329                                     | 10724,10965,1666,1737,212,30,3033,38,51,55902,9329                            | 211,39,6303                                  |
| <b>Ubiquinol / ubiquinone</b> |                                 | 4694,4695,4700,4705,4713,4715,4718,4731,6389,6392                              | 374291,4694,4695,4697,4700,4705,4713,4715,4718,4731,6389,6392                 |                                              |

Entrez Ids of the selected reporter metabolites based on the EHMN network analysis.

## E: Recon1 reporter metabolite enzyme neighbours

| Reporter Metabolite                                         | ER                  |                                                               | WS                                                                   |                       |
|-------------------------------------------------------------|---------------------|---------------------------------------------------------------|----------------------------------------------------------------------|-----------------------|
|                                                             | Upregulated Enzymes | Downregulated Enzymes                                         | Upregulated Enzymes                                                  | Downregulated Enzymes |
| <b>Acetyl-CoA (mitochondria)</b>                            |                     | 38,39,55902                                                   | 38,55902                                                             | 39                    |
| <b>Acetyl-CoA (cytosol)</b>                                 |                     | 38,39,55902,6303                                              | 38,55902                                                             | 39,6303               |
| <b>CoA (mitochondria)</b>                                   | 27349               | 26275,38,39,55902                                             | 212,26275,38,4967,55902                                              | 211,39                |
| <b>CoA (cytosol)</b>                                        | 27349,9517          | 137964,2181,26275,38,39,55902,56894,6303                      | 2181,26275,38,55902,9517                                             | 137964,39,56894,6303  |
| <b>Ubiquinol-10 / ubiquinone-10 (mitochondria)</b>          |                     | 10975,29796,4694,4695,4700,4705,4713,4715,4718,4731,7386,7388 | 10975,29796,374291,4694,4695,4697,4700,4705,4713,4715,4718,4731,7386 |                       |
| <b>Ferricytochrome c / ferrocytochrome c (mitochondria)</b> |                     | 10975, 1327, 29796,7386, 7388, 9377                           | 10975, 29796, 7386, 9377                                             |                       |

Entrez Ids of the selected reporter metabolites based on the Recon1 network analysis.

1. Duarte NC, Becker SA, Jamshidi N, Thiele I, Mo ML, Vo TD, Srivas R, Palsson BO: Global reconstruction of the human metabolic network based on genomic and bibliomic data. Proc Natl Acad Sci U S A 104:1777-1782, 2007
2. Ma H, Sorokin A, Mazein A, Selkov A, Selkov E, Demin O, Goryanin I: The Edinburgh human metabolic network reconstruction and its functional analysis. Mol Syst Biol 3:135, 2007
3. Petersen M, Taylor MA, Saris WHM, Verdich C, Toubro S, MacDonald IA, Rössner S, Stich V, Guy-Grand B, Langin D, Martinez A, Perderson O, Holst C, Sorensen TIA, Astrup A, NUGENOB: Randomised, multi-centre trial of two hypoenergetic diets with different fat content in obese subjects. Int J Obes 30:552-560, 2005.

**Supplementary Table A4:** List of differentially expressed genes during dietary intervention program encoding secreted proteins according to a signal peptide prediction.

| Gene Symbol             | Gene Name                                                                       |
|-------------------------|---------------------------------------------------------------------------------|
| Energy Restriction (ER) | Down Regulated Genes                                                            |
| FMOD                    | Fibromodulin                                                                    |
| NMB                     | Neuromedin B                                                                    |
| THBS4                   | Thrombospondin 4                                                                |
| HP                      | Haptoglobin                                                                     |
| LOX                     | Lysyl Oxidase                                                                   |
| MXRA5                   | Matrix-Remodelling Associated 5                                                 |
| DHCR24                  | 24-Dehydrocholesterol Reductase                                                 |
| CKMT2                   | Creatine Kinase, Mitochondrial 2 (Sarcomeric)                                   |
| AQP1                    | Aquaporin 1 (Colton Blood Group)                                                |
| COMP                    | Cartilage Oligomeric Matrix Protein                                             |
| PPAP2A                  | Phosphatidic Acid Phosphatase Type 2a                                           |
| CXCL9                   | Chemokine (C-X-C Motif) Ligand 9                                                |
| GCSH                    | Glycine Cleavage System Protein H (Aminomethyl Carrier)                         |
| TF                      | Transferrin                                                                     |
| AGT                     | Angiotensinogen (Serpin Peptidase Inhibitor, Clade A, Member 8)                 |
| BENE                    | Mal, T-cell differentiation protein-like                                        |
| LOX                     | Lysyl Oxidase                                                                   |
| C20orf7                 | Chromosome 20 Open Reading Frame 7                                              |
| LAIR1                   | Leukocyte-Associated Ig-Like Receptor 1                                         |
| TMEM14B                 | Transmembrane Protein 14b                                                       |
| PCDH12                  | Protocadherin 12                                                                |
| ICAM3                   | Intercellular Adhesion Molecule 3                                               |
| CDH13                   | Cadherin 13, H-Cadherin (Heart)                                                 |
| MMP15                   | Matrix Metallopeptidase 15 (Membrane-Inserted)                                  |
| LOXL2                   | Lysyl Oxidase-Like 2                                                            |
| LAMB3                   | Laminin, Beta 3                                                                 |
| C14orf147               | Chromosome 14 Open Reading Frame 147                                            |
| SAA4                    | Serum Amyloid A4, Constitutive                                                  |
| RetSat                  | All-Trans-13,14-Dihydroretinol Saturase                                         |
| RDH5                    | Retinol Dehydrogenase 5 (11-Cis And 9-Cis)                                      |
| SLC16A7                 | Solute Carrier Family 16 (Monocarboxylic Acid Transporters), Member 7           |
| OXCT1                   | 3-Oxoacid Coa Transferase 1                                                     |
| MYEOV                   | Myeloma Overexpressed Gene (In A Subset Of T(11;14) Positive Multiple Myelomas) |
| GLRX2                   | Glutaredoxin 2                                                                  |
| SFRP2                   | Secreted Frizzled-Related Protein 2                                             |
| UCRC                    | Ubiquinol-Cytochrome C Reductase Complex (7.2 Kd)                               |

|              |                                                                                         |
|--------------|-----------------------------------------------------------------------------------------|
| C1orf102     | Chromosome 1 Open Reading Frame 102                                                     |
| TMEM14C      | Transmembrane Protein 14c                                                               |
| CYBASC3      | Cytochrome B, Ascorbate Dependent 3                                                     |
| IMPA3        | Inositol monophosphatase domain containing 1                                            |
| FAM82C       | Family With Sequence Similarity 82, Member C                                            |
| TNC          | Tenascin C (Hexabrachion)                                                               |
| MRPS15       | Mitochondrial Ribosomal Protein S15                                                     |
| MGC23909     | Hypothetical Protein Mgc23909                                                           |
| BF373107     | -                                                                                       |
| PON2         | Paraoxonase 2                                                                           |
| AGPAT3       | 1-Acylglycerol-3-Phosphate O-Acyltransferase 3                                          |
| FLJ25530     | Hepatocyte Cell Adhesion Molecule                                                       |
| IGF1         | Insulin-Like Growth Factor 1 (Somatomedin C)                                            |
| GPRC5C       | G Protein-Coupled Receptor, Family C, Group 5, Member C                                 |
| LOC400969    | -                                                                                       |
| HSPA12A      | Heat Shock Protein 12a                                                                  |
| EPHX2        | Epoxide Hydrolase 2, Cytoplasmic                                                        |
| SIL1         | Sil1 Homolog, Endoplasmic Reticulum Chaperone (S. Cerevisiae)                           |
| ASAH1        | N-Acylsphingosine Amidohydrolase (Acid Ceramidase) 1                                    |
| ATP5J        | Atp Synthase, H <sup>+</sup> Transporting, Mitochondrial F0 Complex, Subunit F6         |
| TCTA         | T-Cell Leukemia Translocation Altered Gene                                              |
| ADAMTS2      | Adam Metallopeptidase With Thrombospondin Type 1 Motif, 2                               |
| TSPAN18      | Tetraspanin 18                                                                          |
| BC035751     | -                                                                                       |
| CD164        | Cd164 Antigen, Sialomucin                                                               |
| SLC35B4      | Solute Carrier Family 35, Member B4                                                     |
| FCN1         | Ficolin (Collagen/Fibrinogen Domain Containing) 1                                       |
| MOSC1        | Moco Sulphurase C-Terminal Domain Containing 1                                          |
| COL5A2       | Collagen, Type V, Alpha 2                                                               |
| LFNG         | Lunatic Fringe Homolog (Drosophila)                                                     |
| SDHD         | Succinate Dehydrogenase Complex, Subunit D, Integral Membrane Protein                   |
| RARRES2      | Retinoic Acid Receptor Responder (Tazarotene Induced) 2                                 |
| A_24_P745670 | -                                                                                       |
| PCCB         | Propionyl Coenzyme A Carboxylase, Beta Polypeptide                                      |
| MMP28        | Matrix Metallopeptidase 28                                                              |
| LRIG1        | Leucine-Rich Repeats And Immunoglobulin-Like Domains 1                                  |
| NDUFS3       | Nadh Dehydrogenase (Ubiquinone) Fe-S Protein 3, 30kda (Nadh-Coenzyme Q Reductase)       |
| APLN         | Apelin, Agtrl1 Ligand                                                                   |
| TFPI2        | Tissue Factor Pathway Inhibitor 2                                                       |
| BCKDHB       | Branched Chain Keto Acid Dehydrogenase E1, Beta Polypeptide (Maple Syrup Urine Disease) |

|                         |                                                                                                |
|-------------------------|------------------------------------------------------------------------------------------------|
| LRRN5                   | Leucine Rich Repeat Neuronal 5                                                                 |
| COG8                    | Component Of Oligomeric Golgi Complex 8                                                        |
| TNFRSF21                | Tumor Necrosis Factor Receptor Superfamily, Member 21                                          |
| PCCB                    | Propionyl Coenzyme A Carboxylase, Beta Polypeptide                                             |
| LRRN6A                  | Leucine Rich Repeat Neuronal 6a                                                                |
| MPZL1                   | Myelin Protein Zero-Like 1                                                                     |
| NDUFS2                  | Nadh Dehydrogenase (Ubiquinone) Fe-S Protein 2, 49kda (Nadh-Coenzyme Q Reductase)              |
| PNPLA4                  | Patatin-Like Phospholipase Domain Containing 4                                                 |
| COL4A1                  | Collagen, Type Iv, Alpha 1                                                                     |
| NDUFB5                  | Nadh Dehydrogenase (Ubiquinone) 1 Beta Subcomplex, 5, 16kda                                    |
| NDUFV2                  | Nadh Dehydrogenase (Ubiquinone) Flavoprotein 2, 24kda                                          |
| PXMP2                   | Peroxisomal Membrane Protein 2, 22kda                                                          |
| C2orf7                  | Chromosome 2 Open Reading Frame 7                                                              |
| NIPSNAP3A               | Nipsnap Homolog 3a (C. Elegans)                                                                |
| P4HB                    | Procollagen-Proline, 2-Oxoglutarate 4-Dioxygenase (Proline 4-Hydroxylase), Beta Polypeptide    |
| FXYD6                   | Fxyd Domain Containing Ion Transport Regulator 6                                               |
| C3orf1                  | Chromosome 3 Open Reading Frame 1                                                              |
| CLYBL                   | Citrate Lyase Beta Like                                                                        |
| SDHD                    | Succinate Dehydrogenase Complex, Subunit D, Integral Membrane Protein                          |
| BG952851                | -                                                                                              |
| ITGA6                   | Integrin, Alpha 6                                                                              |
| QIL1                    | Qil1 Protein                                                                                   |
| IGF1                    | Insulin-Like Growth Factor 1 (Somatomedin C)                                                   |
| ALG5                    | Asparagine-Linked Glycosylation 5 Homolog (Yeast, Dolichyl-Phosphate Beta-Glucosyltransferase) |
| NDUFA1                  | Nadh Dehydrogenase (Ubiquinone) 1 Alpha Subcomplex, 1, 7.5kda                                  |
| SPCS3                   | Signal Peptidase Complex Subunit 3 Homolog (S. Cerevisiae)                                     |
| MGC19780                | -                                                                                              |
| MMP17                   | Matrix Metallopeptidase 17 (Membrane-Inserted)                                                 |
| THC2442304              | -                                                                                              |
| CD164                   | Cd164 Antigen, Sialomucin                                                                      |
| NID2                    | Nidogen 2 (Osteonidogen)                                                                       |
| NPB                     | Neuropeptide B                                                                                 |
| PHB                     | Prohibitin                                                                                     |
| ENG                     | Endoglin (Osler-Rendu-Weber Syndrome 1)                                                        |
| C10orf74                | -                                                                                              |
| TRA1                    | Heat shock protein 90kDa beta (Grp94), member 1                                                |
| GPAA1                   | Glycosylphosphatidylinositol Anchor Attachment Protein 1 Homolog (Yeast)                       |
| Energy Restriction (ER) | Up Regulated Genes                                                                             |
| RARRES1                 | Retinoic Acid Receptor Responder (Tazarotene Induced) 1                                        |



|          |                                                            |
|----------|------------------------------------------------------------|
| EDN1     | Endothelin 1                                               |
| ROBO3    | Roundabout, Axon Guidance Receptor, Homolog 3 (Drosophila) |
| GPX3     | Glutathione Peroxidase 3 (Plasma)                          |
| ANGPTL4  | Angiopoietin-Like 4                                        |
| C7       | Complement Component 7                                     |
| HTRA3    | Htra Serine Peptidase 3                                    |
| MAN2A2   | Mannosidase, Alpha, Class 2a, Member 2                     |
| C9orf111 | Hypothetical Protein Flj31318                              |

***Weight Stabilization  
(WS)***

***Down Regulated Genes***

|              |                                                                                               |
|--------------|-----------------------------------------------------------------------------------------------|
| ITGAX        | Integrin, Alpha X (Complement Component 3 Receptor 4 Subunit)                                 |
| SLAMF8       | Slam Family Member 8                                                                          |
| GDF15        | Growth Differentiation Factor 15                                                              |
| LIPA         | Lipase A, Lysosomal Acid, Cholesterol Esterase (Wolman Disease)                               |
| CD52         | Cd52 Antigen (Campath-1 Antigen)                                                              |
| RARRES1      | Retinoic Acid Receptor Responder (Tazarotene Induced) 1                                       |
| CTSB         | Cathepsin B                                                                                   |
| ACP5         | Acid Phosphatase 5, Tartrate Resistant                                                        |
| HCST         | Hematopoietic Cell Signal Transducer                                                          |
| CHI3L1       | Chitinase 3-Like 1 (Cartilage Glycoprotein-39)                                                |
| TYROBP       | Tyro Protein Tyrosine Kinase Binding Protein                                                  |
| GLIPR1       | Gli Pathogenesis-Related 1 (Glioma)                                                           |
| CPVL         | Carboxypeptidase, Vitellogenic-Like                                                           |
| ITGB2        | Integrin, Beta 2 (Complement Component 3 Receptor 3 And 4 Subunit)                            |
| IFI30        | Interferon, Gamma-Inducible Protein 30                                                        |
| GLA          | Galactosidase, Alpha                                                                          |
| DHRS9        | Dehydrogenase/Reductase (Sdr Family) Member 9                                                 |
| CD53         | Cd53 Antigen                                                                                  |
| RNASET2      | Ribonuclease T2                                                                               |
| CTSS         | Cathepsin S                                                                                   |
| PLA2G7       | Phospholipase A2, Group Vii (Platelet-Activating Factor Acetylhydrolase, Plasma)              |
| ITGB5        | Integrin, Beta 5                                                                              |
| HEXB         | Hexosaminidase B (Beta Polypeptide)                                                           |
| IL4I1        | Interleukin 4 Induced 1                                                                       |
| A_23_P170719 | -                                                                                             |
| ITGAM        | Integrin, Alpha M (Complement Component 3 Receptor 3 Subunit)                                 |
| PPT1         | Palmitoyl-Protein Thioesterase 1 (Ceroid-Lipofuscinosis, Neuronal 1, Infantile)               |
| EMILIN2      | Elastin Microfibril Interfacer 2                                                              |
| SPP1         | Secreted Phosphoprotein 1 (Osteopontin, Bone Sialoprotein I, Early T-Lymphocyte Activation 1) |
| LHFPL2       | Lipoma Hmgic Fusion Partner-Like 2                                                            |

|            |                                                                                                        |
|------------|--------------------------------------------------------------------------------------------------------|
| SPINT2     | Serine Peptidase Inhibitor, Kunitz Type, 2                                                             |
| GPX3       | Glutathione Peroxidase 3 (Plasma)                                                                      |
| ATP6V0B    | AtPase, H <sup>+</sup> Transporting, Lysosomal 21kda, V0 Subunit B                                     |
| HAVCR2     | Hepatitis A Virus Cellular Receptor 2                                                                  |
| ANGPTL4    | Angiopoietin-Like 4                                                                                    |
| FLJ11000   | Hypothetical Protein Flj11000                                                                          |
| CTSC       | Cathepsin C                                                                                            |
| GUSB       | Glucuronidase, Beta                                                                                    |
| CTSD       | Cathepsin D (Lysosomal Aspartyl Peptidase)                                                             |
| MMP9       | Matrix Metallopeptidase 9 (Gelatinase B, 92kda Gelatinase, 92kda Type Iv Collagenase)                  |
| CTSL       | Cathepsin L                                                                                            |
| SEMA3G     | Sema Domain, Immunoglobulin Domain (Ig), Short Basic Domain, Secreted, (Semaphorin) 3g                 |
| ERO1L      | Ero1-Like (S. Cerevisiae)                                                                              |
| HLA-DMB    | Major Histocompatibility Complex, Class Ii, Dm Beta                                                    |
| GPC4       | Glypican 4                                                                                             |
| LYZ        | Lysozyme (Renal Amyloidosis)                                                                           |
| IGSF21     | Immunoglobulin Superfamily, Member 21                                                                  |
| CD83       | Cd83 Antigen (Activated B Lymphocytes, Immunoglobulin Superfamily)                                     |
| VSIG4      | V-Set And Immunoglobulin Domain Containing 4                                                           |
| GPC1       | Glypican 1                                                                                             |
| LGMN       | Legumain                                                                                               |
| LDLR       | Low Density Lipoprotein Receptor (Familial Hypercholesterolemia)                                       |
| HSD11B1    | Hydroxysteroid (11-Beta) Dehydrogenase 1                                                               |
| APOC1      | Apolipoprotein C-I                                                                                     |
| FLJ22875   | -                                                                                                      |
| FCGR2B     | Fc Fragment Of Igg, Low Affinity Iib, Receptor (Cd32)                                                  |
| NRP2       | Neuropilin 2                                                                                           |
| THC2364841 | -                                                                                                      |
| CR593158   | -                                                                                                      |
| CSF1R      | Colony Stimulating Factor 1 Receptor, Formerly Mcdonough Feline Sarcoma Viral (V-Fms) Oncogene Homolog |
| SCPEP1     | Serine Carboxypeptidase 1                                                                              |
| FUCA1      | Fucosidase, Alpha-L- 1, Tissue                                                                         |
| FCGR2A     | Fc Fragment Of Igg, Low Affinity Iia, Receptor (Cd32)                                                  |
| IL10RA     | Interleukin 10 Receptor, Alpha                                                                         |
| PAPLN      | Papilin, Proteoglycan-Like Sulfated Glycoprotein                                                       |
| ATP6AP1    | AtPase, H <sup>+</sup> Transporting, Lysosomal Accessory Protein 1                                     |
| GAA        | Glucosidase, Alpha; Acid (Pompe Disease, Glycogen Storage Disease Type Ii)                             |
| RTN4RL1    | Reticulon 4 Receptor-Like 1                                                                            |
| FCER1G     | Fc Fragment Of Ige, High Affinity I, Receptor For; Gamma Polypeptide                                   |

|           |                                                                               |
|-----------|-------------------------------------------------------------------------------|
| PERP      | Perp, Tp53 Apoptosis Effector                                                 |
| HLA-DPB1  | Major Histocompatibility Complex, Class Ii, Dp Beta 1                         |
| PSAP      | Prosaposin (Variant Gaucher Disease And Variant Metachromatic Leukodystrophy) |
| GALC      | Galactosylceramidase                                                          |
| SLC39A8   | Solute Carrier Family 39 (Zinc Transporter), Member 8                         |
| COLEC11   | Collectin Sub-Family Member 11                                                |
| THBS1     | Thrombospondin 1                                                              |
| TNFRSF12A | Tumor Necrosis Factor Receptor Superfamily, Member 12a                        |
| FCGBP     | Fc Fragment Of Igg Binding Protein                                            |
| PRG1      | Proteoglycan 1, Secretory Granule                                             |
| EDN1      | Endothelin 1                                                                  |
| TGOLN2    | Trans-Golgi Network Protein 2                                                 |
| AK024680  | -                                                                             |
| LY96      | Lymphocyte Antigen 96                                                         |
| APLP2     | Amyloid Beta (A4) Precursor-Like Protein 2                                    |
| FOLR2     | Folate Receptor 2 (Fetal)                                                     |
| FLJ22662  | Hypothetical Protein Flj22662                                                 |
| MGC54289  | -                                                                             |
| MRC1L1    | Mannose Receptor, C Type 1-Like 1                                             |
| GP9       | Glycoprotein Ix (Platelet)                                                    |
| C1QA      | Complement Component 1, Q Subcomponent, A Chain                               |
| C1QB      | Complement Component 1, Q Subcomponent, B Chain                               |
| LY86      | Lymphocyte Antigen 86                                                         |
| CFHL1     | Complement factor H-related 1                                                 |
| MERTK     | C-Mer Proto-Oncogene Tyrosine Kinase                                          |
| SDC4      | Syndecan 4 (Amphiglycan, Ryudocan)                                            |
| C7        | Complement Component 7                                                        |
| SRPX2     | Sushi-Repeat-Containing Protein, X-Linked 2                                   |
| PTPNS1    | Protein Tyrosine Phosphatase, Non-Receptor Type Substrate 1                   |
| SCARB2    | Scavenger Receptor Class B, Member 2                                          |
| CKLFSF3   | CKLF-like MARVEL transmembrane domain containing 3                            |
| BMP6      | Bone Morphogenetic Protein 6                                                  |
| GALNACT-2 | Chondroitin Sulfate Galnact-2                                                 |
| LYPLA3    | Lysophospholipase 3 (Lysosomal Phospholipase A2)                              |
| ADAM9     | Adam Metallopeptidase Domain 9 (Meltrin Gamma)                                |
| SLITL2    | Slit-Like 2 (Drosophila)                                                      |
| C2        | Complement Component 2                                                        |
| STCH      | Stress 70 Protein Chaperone, Microsome-Associated, 60kda                      |
| CTSZ      | Cathepsin Z                                                                   |
| SCUBE2    | Signal Peptide, Cub Domain, Egf-Like 2                                        |
| MR1       | Major Histocompatibility Complex, Class I-Related                             |

|              |                                                                                        |
|--------------|----------------------------------------------------------------------------------------|
| CYP1B1       | Cytochrome P450, Family 1, Subfamily B, Polypeptide 1                                  |
| LEPR         | Leptin Receptor                                                                        |
| MAN2B2       | Mannosidase, Alpha, Class 2b, Member 2                                                 |
| BE926212     | -                                                                                      |
| IL15         | Interleukin 15                                                                         |
| HTRA3        | Htra Serine Peptidase 3                                                                |
| TMED9        | Transmembrane Emp24 Protein Transport Domain Containing 9                              |
| SPFH1        | Spfh Domain Family, Member 1                                                           |
| CMPK         | Cytidylate Kinase                                                                      |
| CYBRD1       | Cytochrome B Reductase 1                                                               |
| CCL2         | Chemokine (C-C Motif) Ligand 2                                                         |
| CREG1        | Cellular Repressor Of E1a-Stimulated Genes 1                                           |
| HLA-DMA      | Major Histocompatibility Complex, Class Ii, Dm Alpha                                   |
| LAMP1        | Lysosomal-Associated Membrane Protein 1                                                |
| BU732811     | -                                                                                      |
| PPGB         | Protective Protein For Beta-Galactosidase (Galactosialidosis)                          |
| C1QG         | Complement component 1, q subcomponent, C chain                                        |
| CD33         | Cd33 Antigen (Gp67)                                                                    |
| CASC4        | Cancer Susceptibility Candidate 4                                                      |
| COL8A2       | Collagen, Type Viii, Alpha 2                                                           |
| SEMA3B       | Sema Domain, Immunoglobulin Domain (Ig), Short Basic Domain, Secreted, (Semaphorin) 3b |
| EXT1         | Exostoses (Multiple) 1                                                                 |
| SEMA3B       | Sema Domain, Immunoglobulin Domain (Ig), Short Basic Domain, Secreted, (Semaphorin) 3b |
| A_24_P835388 | -                                                                                      |
| SLC24A6      | Solute Carrier Family 24 (Sodium/Potassium/Calcium Exchanger), Member 6                |
| ATP6AP2      | Atpase, H <sup>+</sup> Transporting, Lysosomal Accessory Protein 2                     |
| NFE2L1       | Nuclear Factor (Erythroid-Derived 2)-Like 1                                            |
| PORIMIN      | -                                                                                      |
| CYP26B1      | Cytochrome P450, Family 26, Subfamily B, Polypeptide 1                                 |
| MAN2A2       | Mannosidase, Alpha, Class 2a, Member 2                                                 |
| TMEM32       | Transmembrane Protein 32                                                               |
| CGREF1       | Cell Growth Regulator With Ef-Hand Domain 1                                            |
| MGAT1        | Mannosyl (Alpha-1,3-)-Glycoprotein Beta-1,2-N-Acetylglucosaminyltransferase            |
| LUM          | Lumican                                                                                |
| TMCO3        | Transmembrane And Coiled-Coil Domains 3                                                |
| MEST         | Mesoderm Specific Transcript Homolog (Mouse)                                           |
| ASPN         | Asporin (Lrr Class 1)                                                                  |
| TGFBI        | Transforming Growth Factor, Beta-Induced, 68kda                                        |
| HLA-DPA1     | Major Histocompatibility Complex, Class Ii, Dp Alpha 1                                 |
| SLC43A3      | Solute Carrier Family 43, Member 3                                                     |

|          |                                                                                                              |
|----------|--------------------------------------------------------------------------------------------------------------|
| TMEM24   | Transmembrane Protein 24                                                                                     |
| MPEG1    | Macrophage Expressed Gene 1                                                                                  |
| CB049198 | -                                                                                                            |
| HLA-DOA  | Major Histocompatibility Complex, Class Ii, Do Alpha                                                         |
| THBS2    | Thrombospondin 2                                                                                             |
| ALOX5AP  | Arachidonate 5-Lipoxygenase-Activating Protein                                                               |
| FAM3C    | Family With Sequence Similarity 3, Member C                                                                  |
| GLB1     | Galactosidase, Beta 1                                                                                        |
| FAM14A   | Family With Sequence Similarity 14, Member A                                                                 |
| TMEM8    | Transmembrane Protein 8 (Five Membrane-Spanning Domains)                                                     |
| UXS1     | Udp-Glucuronate Decarboxylase 1                                                                              |
| COL6A2   | Collagen, Type Vi, Alpha 2                                                                                   |
| ST3GAL4  | St3 Beta-Galactoside Alpha-2,3-Sialyltransferase 4                                                           |
| PDGFC    | Spinal Cord-Derived Growth Factor; Secretory Growth Factor-Like Protein Fallotein                            |
| C2orf18  | Chromosome 2 Open Reading Frame 18                                                                           |
| COMTD1   | Catechol-O-Methyltransferase Domain Containing 1                                                             |
| CYBB     | Cytochrome B-245, Beta Polypeptide (Chronic Granulomatous Disease)                                           |
| CHSY1    | Carbohydrate (Chondroitin) Synthase 1                                                                        |
| C11orf15 | -                                                                                                            |
| SFRP4    | Secreted Frizzled-Related Protein 4                                                                          |
| ENPP2    | Ectonucleotide Pyrophosphatase/Phosphodiesterase 2 (Autotaxin)                                               |
| CYP51A1  | Cytochrome P450, Family 51, Subfamily A, Polypeptide 1                                                       |
| GPR34    | G Protein-Coupled Receptor 34                                                                                |
| SLC16A5  | Solute Carrier Family 16 (Monocarboxylic Acid Transporters), Member 5                                        |
| RCN1     | Reticulocalbin 1, Ef-Hand Calcium Binding Domain                                                             |
| PCDH9    | Protocadherin 9                                                                                              |
| M27126   | -                                                                                                            |
| AK098629 | -                                                                                                            |
| HLA-DQB1 | Major Histocompatibility Complex, Class Ii, Dq Beta 1                                                        |
| LILRB2   | Leukocyte Immunoglobulin-Like Receptor, Subfamily B (With Tm And Itim Domains), Member 2                     |
| TXNDC5   | Thioredoxin Domain Containing 5                                                                              |
| SRD5A2L  | Steroid 5 Alpha-Reductase 2-Like                                                                             |
| SLAMF9   | Slam Family Member 9                                                                                         |
| TLR4     | Toll-Like Receptor 4                                                                                         |
| APH1B    | Anterior Pharynx Defective 1 Homolog B (C. Elegans)                                                          |
| ANPEP    | Alanyl (Membrane) Aminopeptidase (Aminopeptidase N, Aminopeptidase M, Microsomal Aminopeptidase, Cd13, P150) |
| CFH      | Complement Factor H                                                                                          |
| HLA-DRA  | Major Histocompatibility Complex, Class Ii, Dr Alpha                                                         |

*Weight Stabilization*

*Up Regulated Genes*

|           |                                                                                         |
|-----------|-----------------------------------------------------------------------------------------|
| (WS)      |                                                                                         |
| TF        | Transferrin                                                                             |
| FMOD      | Fibromodulin                                                                            |
| AQP1      | Aquaporin 1 (Colton Blood Group)                                                        |
| ITGA6     | Integrin, Alpha 6                                                                       |
| THBS4     | Thrombospondin 4                                                                        |
| SLC16A7   | Solute Carrier Family 16 (Monocarboxylic Acid Transporters), Member 7                   |
| TNN       | Tenascin N                                                                              |
| CXCL14    | Chemokine (C-X-C Motif) Ligand 14                                                       |
| SVEP1     | Sushi, Von Willebrand Factor Type A, Egf And Pentraxin Domain Containing 1              |
| C20orf7   | Chromosome 20 Open Reading Frame 7                                                      |
| COMP      | Cartilage Oligomeric Matrix Protein                                                     |
| MMP15     | Matrix Metalloproteinase 15 (Membrane-Inserted)                                         |
| SAA4      | Serum Amyloid A4, Constitutive                                                          |
| CSPG4     | Chondroitin Sulfate Proteoglycan 4 (Melanoma-Associated)                                |
| GJA4      | Gap Junction Protein, Alpha 4, 37kda (Connexin 37)                                      |
| LRIG1     | Leucine-Rich Repeats And Immunoglobulin-Like Domains 1                                  |
| BC035751  | -                                                                                       |
| LAMA5     | Laminin, Alpha 5                                                                        |
| PXMP2     | Peroxisomal Membrane Protein 2, 22kda                                                   |
| BCKDHB    | Branched Chain Keto Acid Dehydrogenase E1, Beta Polypeptide (Maple Syrup Urine Disease) |
| NID2      | Nidogen 2 (Osteonidogen)                                                                |
| SFRP2     | Secreted Frizzled-Related Protein 2                                                     |
| IGF1      | Insulin-Like Growth Factor 1 (Somatomedin C)                                            |
| AGT       | Angiotensinogen (Serpine Peptidase Inhibitor, Clade A, Member 8)                        |
| TFPI2     | Tissue Factor Pathway Inhibitor 2                                                       |
| BENE      | Mal, T-cell differentiation protein-like                                                |
| ADAMTSL3  | Adamts-Like 3                                                                           |
| MOSC1     | Moco Sulphurase C-Terminal Domain Containing 1                                          |
| TSPAN3    | Tetraspanin 3                                                                           |
| EPHX2     | Epoxide Hydrolase 2, Cytoplasmic                                                        |
| FLJ25530  | Hepatocyte Cell Adhesion Molecule                                                       |
| CLEC14A   | C-Type Lectin Domain Family 14, Member A                                                |
| LOC400969 | -                                                                                       |
| PODXL     | Podocalyxin-Like                                                                        |
| TSPAN18   | Tetraspanin 18                                                                          |
| HIG2      | Hypoxia-Inducible Protein 2                                                             |
| AZGP1     | Alpha-2-Glycoprotein 1, Zinc                                                            |
| FBLN5     | Fibulin 5                                                                               |
| LRRN6A    | Leucine Rich Repeat Neuronal 6a                                                         |

|          |                                                                                                        |
|----------|--------------------------------------------------------------------------------------------------------|
| SERPINF1 | Serpin Peptidase Inhibitor, Clade F (Alpha-2 Antiplasmin, Pigment Epithelium Derived Factor), Member 1 |
| SCN4B    | Sodium Channel, Voltage-Gated, Type Iv, Beta                                                           |
| IGSF4    | Immunoglobulin Superfamily, Member 4                                                                   |
| HP       | Haptoglobin                                                                                            |
| PLAT     | Plasminogen Activator, Tissue                                                                          |
| NPDC1    | Dkfpz586j0523 Protein                                                                                  |
| AZGP1    | Alpha-2-Glycoprotein 1, Zinc                                                                           |
| FXYD6    | Fxyd Domain Containing Ion Transport Regulator 6                                                       |
| GCSH     | Glycine Cleavage System Protein H (Aminomethyl Carrier)                                                |
| PDGFD    | Platelet Derived Growth Factor D                                                                       |
| ACVR1C   | Activin A Receptor, Type Ic                                                                            |
| TMEPAI   | Transmembrane, Prostate Androgen Induced Rna                                                           |
| GJA12    | Gap Junction Protein, Alpha 12, 47kda                                                                  |
| EMP1     | Epithelial Membrane Protein 1                                                                          |
| NMB      | Neuromedin B                                                                                           |
| FLJ25530 | Hepatocyte Cell Adhesion Molecule                                                                      |

***Dietary Intervention  
(DI)***

***Down Regulated Genes***

|        |                                                                                               |
|--------|-----------------------------------------------------------------------------------------------|
| IGSF21 | Immunoglobulin Superfamily, Member 21                                                         |
| LOXL2  | Lysyl Oxidase-Like 2                                                                          |
| PPT1   | Palmitoyl-Protein Thioesterase 1 (Ceroid-Lipofuscinosis, Neuronal 1, Infantile)               |
| SCARB2 | Scavenger Receptor Class B, Member 2                                                          |
| ASAH1  | N-Acylsphingosine Amidohydrolase (Acid Ceramidase) 1                                          |
| GPR34  | G Protein-Coupled Receptor 34                                                                 |
| SPP1   | Secreted Phosphoprotein 1 (Osteopontin, Bone Sialoprotein I, Early T-Lymphocyte Activation 1) |
| TIMP1  | Timp Metallopeptidase Inhibitor 1                                                             |
| HCST   | Hematopoietic Cell Signal Transducer                                                          |
| MRC1L1 | Mannose Receptor, C Type 1-Like 1                                                             |
| SFRP4  | Secreted Frizzled-Related Protein 4                                                           |
| PSAP   | Prosaposin (Variant Gaucher Disease And Variant Metachromatic Leukodystrophy)                 |
| VSIG4  | V-Set And Immunoglobulin Domain Containing 4                                                  |
| CHI3L1 | Chitinase 3-Like 1 (Cartilage Glycoprotein-39)                                                |
| CTSZ   | Cathepsin Z                                                                                   |
| C1QB   | Complement Component 1, Q Subcomponent, B Chain                                               |
| SLAMF8 | Slam Family Member 8                                                                          |
| CD248  | Cd248 Antigen, Endosialin                                                                     |
| ITGB5  | Integrin, Beta 5                                                                              |
| PLA2G7 | Phospholipase A2, Group Vii (Platelet-Activating Factor Acetylhydrolase, Plasma)              |
| GLB1   | Galactosidase, Beta 1                                                                         |

|               |                                                                                                        |
|---------------|--------------------------------------------------------------------------------------------------------|
| FCGBP         | Fc Fragment Of Igg Binding Protein                                                                     |
| CD52          | Cd52 Antigen (Campath-1 Antigen)                                                                       |
| LGMN          | Legumain                                                                                               |
| IFI30         | Interferon, Gamma-Inducible Protein 30                                                                 |
| GLIPR1        | Gli Pathogenesis-Related 1 (Glioma)                                                                    |
| MFAP5         | Microfibrillar Associated Protein 5                                                                    |
| PPGB          | Protective Protein For Beta-Galactosidase (Galactosialidosis)                                          |
| EMP3          | Epithelial Membrane Protein 3                                                                          |
| LIPA          | Lipase A, Lysosomal Acid, Cholesterol Esterase (Wolman Disease)                                        |
| CTSB          | Cathepsin B                                                                                            |
| RPN2          | Ribophorin Ii                                                                                          |
| DKFZP586H2123 | Regeneration Associated Muscle Protease                                                                |
| C1QG          | Complement component 1, q subcomponent, C chain                                                        |
| EMILIN2       | Elastin Microfibril Interfacer 2                                                                       |
| LOC389033     | Hypothetical Loc389033                                                                                 |
| STAB1         | Stabilin 1                                                                                             |
| CSF1R         | Colony Stimulating Factor 1 Receptor, Formerly McDonough Feline Sarcoma Viral (V-Fms) Oncogene Homolog |
| TNFRSF12A     | Tumor Necrosis Factor Receptor Superfamily, Member 12a                                                 |
| LHFPL2        | Lipoma Hmgic Fusion Partner-Like 2                                                                     |
| FCGR2B        | Fc Fragment Of Igg, Low Affinity Iib, Receptor (Cd32)                                                  |
| ITGAM         | Integrin, Alpha M (Complement Component 3 Receptor 3 Subunit)                                          |
| ITGB2         | Integrin, Beta 2 (Complement Component 3 Receptor 3 And 4 Subunit)                                     |
| FOLR2         | Folate Receptor 2 (Fetal)                                                                              |
| MMP9          | Matrix Metallopeptidase 9 (Gelatinase B, 92kda Gelatinase, 92kda Type Iv Collagenase)                  |
| HAVCR2        | Hepatitis A Virus Cellular Receptor 2                                                                  |
| RARRES1       | Retinoic Acid Receptor Responder (Tazarotene Induced) 1                                                |
| TGFBI         | Transforming Growth Factor, Beta-Induced, 68kda                                                        |
| C2            | Complement Component 2                                                                                 |
| MXRA5         | Matrix-Remodelling Associated 5                                                                        |
| LILRB5        | Leukocyte Immunoglobulin-Like Receptor, Subfamily B (With Tm And Itim Domains), Member 5               |
| CREG1         | Cellular Repressor Of E1a-Stimulated Genes 1                                                           |
| CSPG2         | Chondroitin Sulfate Proteoglycan 2 (Versican)                                                          |
| A_24_P835388  | -                                                                                                      |
| AGPAT3        | 1-Acylglycerol-3-Phosphate O-Acyltransferase 3                                                         |
| GGH           | Gamma-Glutamyl Hydrolase (Conjugase, Folylpolygammaglutamyl Hydrolase)                                 |
| LY86          | Lymphocyte Antigen 86                                                                                  |
| IL10RA        | Interleukin 10 Receptor, Alpha                                                                         |
| SRD5A2L       | Steroid 5 Alpha-Reductase 2-Like                                                                       |
| ADAM12        | Adam Metallopeptidase Domain 12 (Meltrin Alpha)                                                        |



|            |                                                                          |
|------------|--------------------------------------------------------------------------|
| FN1        | Fibronectin 1                                                            |
| CTSC       | Cathepsin C                                                              |
| TMCO3      | Transmembrane And Coiled-Coil Domains 3                                  |
| CPVL       | Carboxypeptidase, Vitellogenic-Like                                      |
| CR593158   | -                                                                        |
| HLA-DMA    | Major Histocompatibility Complex, Class Ii, Dm Alpha                     |
| CCL2       | Chemokine (C-C Motif) Ligand 2                                           |
| CCL13      | Chemokine (C-C Motif) Ligand 13                                          |
| SLC31A2    | Solute Carrier Family 31 (Copper Transporters), Member 2                 |
| IL1R1      | Interleukin 1 Receptor, Type I                                           |
| FCER1G     | Fc Fragment Of Ige, High Affinity I, Receptor For; Gamma Polypeptide     |
| LOC202459  | Similar To Riken Cdna 2310008m10                                         |
| COL5A2     | Collagen, Type V, Alpha 2                                                |
| PTAFR      | Platelet-Activating Factor Receptor                                      |
| CXCL9      | Chemokine (C-X-C Motif) Ligand 9                                         |
| RNASE1     | Ribonuclease, Rnase A Family, 1 (Pancreatic)                             |
| LDLR       | Low Density Lipoprotein Receptor (Familial Hypercholesterolemia)         |
| CTSS       | Cathepsin S                                                              |
| CD33       | Cd33 Antigen (Gp67)                                                      |
| HSPC196    | Hypothetical Protein Hspc196                                             |
| GPC1       | Glypican 1                                                               |
| HLA-DPB1   | Major Histocompatibility Complex, Class Ii, Dp Beta 1                    |
| FLJ22875   | -                                                                        |
| THC2364841 | -                                                                        |
| CD9        | Cd9 Antigen (P24)                                                        |
| CD53       | Cd53 Antigen                                                             |
| HLA-DMB    | Major Histocompatibility Complex, Class Ii, Dm Beta                      |
| FUCA1      | Fucosidase, Alpha-L- 1, Tissue                                           |
| COLEC11    | Collectin Sub-Family Member 11                                           |
| ATP6V0B    | Atpase, H+ Transporting, Lysosomal 21kda, V0 Subunit B                   |
| NOMO1      | Nodal Modulator 1                                                        |
| NPC2       | Niemann-Pick Disease, Type C2                                            |
| SLC39A14   | Solute Carrier Family 39 (Zinc Transporter), Member 14                   |
| APH1B      | Anterior Pharynx Defective 1 Homolog B (C. Elegans)                      |
| LOX        | Lysyl Oxidase                                                            |
| CD47       | Cd47 Antigen (Rh-Related Antigen, Integrin-Associated Signal Transducer) |
| PLTP       | Phospholipid Transfer Protein                                            |
| LACE1      | Lactation Elevated-1                                                     |
| RNASET2    | Ribonuclease T2                                                          |
| TMED5      | Transmembrane Emp24 Protein Transport Domain Containing 5                |
| IMPA3      | cDNA FLJ33669 fis, clone BRAMY2028740                                    |

|              |                                                                                             |
|--------------|---------------------------------------------------------------------------------------------|
| SPINT2       | Serine Peptidase Inhibitor, Kunitz Type, 2                                                  |
| A_23_P170719 | -                                                                                           |
| C1QA         | Complement Component 1, Q Subcomponent, A Chain                                             |
| MPEG1        | Macrophage Expressed Gene 1                                                                 |
| SVH          | Svh Protein                                                                                 |
| GDF15        | Growth Differentiation Factor 15                                                            |
| P4HB         | Procollagen-Proline, 2-Oxoglutarate 4-Dioxygenase (Proline 4-Hydroxylase), Beta Polypeptide |
| SPCS3        | Signal Peptidase Complex Subunit 3 Homolog (S. Cerevisiae)                                  |
| DNASE2       | Deoxyribonuclease Ii, Lysosomal                                                             |
| BE926212     | -                                                                                           |
| DHCR24       | 24-Dehydrocholesterol Reductase                                                             |
| ANGPTL4      | Angiopoietin-Like 4                                                                         |
| IMPA3        | cDNA FLJ33669 fis, clone BRAMY2028740                                                       |
| TPARL        | Tpa Regulated Locus                                                                         |
| GP9          | Glycoprotein Ix (Platelet)                                                                  |
| CD97         | Cd97 Antigen                                                                                |
| HLA-DQB1     | Major Histocompatibility Complex, Class Ii, Dq Beta 1                                       |
| ADAM9        | Adam Metallopeptidase Domain 9 (Meltrin Gamma)                                              |
| C1orf85      | Chromosome 1 Open Reading Frame 85                                                          |
| RDH5         | Retinol Dehydrogenase 5 (11-Cis And 9-Cis)                                                  |
| HLA-DPA1     | Major Histocompatibility Complex, Class Ii, Dp Alpha 1                                      |
| HSD11B1      | Hydroxysteroid (11-Beta) Dehydrogenase 1                                                    |
| THC2280549   | -                                                                                           |
| LILRA6       | Leukocyte Immunoglobulin-Like Receptor, Subfamily A (With Tm Domain), Member 6              |
| FCGR2A       | Fc Fragment Of Igg, Low Affinity Iia, Receptor (Cd32)                                       |
| AK024680     | -                                                                                           |
| IL10RB       | Interleukin 10 Receptor, Beta                                                               |
| ITGAV        | Integrin, Alpha V (Vitronectin Receptor, Alpha Polypeptide, Antigen Cd51)                   |
| MGAT4A       | Mannosyl (Alpha-1,3-)-Glycoprotein Beta-1,4-N-Acetylglucosaminyltransferase, Isozyme A      |
| MRPL14       | Mitochondrial Ribosomal Protein L14                                                         |
| CYBASC3      | Cytochrome B, Ascorbate Dependent 3                                                         |
| IL4I1        | Interleukin 4 Induced 1                                                                     |
| ATP6AP1      | Atpase, H+ Transporting, Lysosomal Accessory Protein 1                                      |
| GK001        | Coiled-coil domain containing 47                                                            |
| MGAT1        | Mannosyl (Alpha-1,3-)-Glycoprotein Beta-1,2-N-Acetylglucosaminyltransferase                 |
| CYP1B1       | Cytochrome P450, Family 1, Subfamily B, Polypeptide 1                                       |
| PIGK         | Phosphatidylinositol Glycan, Class K                                                        |
| ATP6AP2      | Atpase, H+ Transporting, Lysosomal Accessory Protein 2                                      |
| CD83         | Cd83 Antigen (Activated B Lymphocytes, Immunoglobulin Superfamily)                          |

|                           |                                                                    |
|---------------------------|--------------------------------------------------------------------|
| COL5A1                    | Collagen, Type V, Alpha 1                                          |
| HLA-DQA2                  | Major Histocompatibility Complex, Class Ii, Dq Alpha 1             |
| M6PR                      | Mannose-6-Phosphate Receptor (Cation Dependent)                    |
| SRPX2                     | Sushi-Repeat-Containing Protein, X-Linked 2                        |
| C2orf7                    | Chromosome 2 Open Reading Frame 7                                  |
| PIGF                      | Phosphatidylinositol Glycan, Class F                               |
| KSP37                     | Ksp37 Protein                                                      |
| BST1                      | Bone Marrow Stromal Cell Antigen 1                                 |
| PLAU                      | Plasminogen Activator, Urokinase                                   |
| TMP21                     | Transmembrane emp24-like trafficking protein 10 (yeast)            |
| LAIR1                     | Leukocyte-Associated Ig-Like Receptor 1                            |
| Dietary Intervention (DI) | Up Regulated Genes                                                 |
| HIG2                      | Hypoxia-Inducible Protein 2                                        |
| TF                        | Transferrin                                                        |
| ANG                       | Angiogenin, Ribonuclease, Rnase A Family, 5                        |
| TF                        | Transferrin                                                        |
| FIGF                      | C-Fos Induced Growth Factor (Vascular Endothelial Growth Factor D) |
| LGI4                      | Leucine-Rich Repeat Lgi Family, Member 4                           |
| TNN                       | Tenascin N                                                         |
| LRIG1                     | Leucine-Rich Repeats And Immunoglobulin-Like Domains 1             |
| AZGP1                     | Alpha-2-Glycoprotein 1, Zinc                                       |

---

**Supplementary Table A5:** List of genes predictors of insulin sensitivity in each dietary phase using partial least squares-regression (PLS-R) analysis

| Order                                                                                                          | Gene Symbol  | Gene Name                                                                                      | Secretion | VIP   |
|----------------------------------------------------------------------------------------------------------------|--------------|------------------------------------------------------------------------------------------------|-----------|-------|
| <i>Energy Restriction (ER) : R<sup>2</sup>x=89% R<sup>2</sup>y=100% Q<sup>2</sup>%=91% R<sup>2</sup>%=100%</i> |              |                                                                                                |           |       |
| 1                                                                                                              | FADS2        | Fatty Acid Desaturase 2                                                                        | -         | 4.194 |
| 2                                                                                                              | SCD          | Stearoyl-Coa Desaturase (Delta-9-Desaturase)                                                   | -         | 3.984 |
| 3                                                                                                              | HP           | Haptoglobin                                                                                    | Yes       | 3.702 |
| 4                                                                                                              | LOC55908     | Hepatocellular Carcinoma-Associated Gene Td26                                                  | -         | 2.653 |
| 5                                                                                                              | FADS1        | Fatty Acid Desaturase 1                                                                        | -         | 2.638 |
| 6                                                                                                              | APOC1        | Apolipoprotein C-I                                                                             | Yes       | 2.606 |
| 7                                                                                                              | THBS4        | Thrombospondin 4                                                                               | Yes       | 2.579 |
| 8                                                                                                              | COMP         | Cartilage Oligomeric Matrix Protein                                                            | Yes       | 2.425 |
| 9                                                                                                              | SPP1         | Secreted Phosphoprotein 1 (Osteopontin, Bone Sialoprotein I, Early T-Lymphocyte Activation 1)  | Yes       | 2.306 |
| 10                                                                                                             | DGAT2        | Diacylglycerol O-Acyltransferase Homolog 2 (Mouse)                                             | -         | 1.963 |
| 11                                                                                                             | EDN1         | Endothelin 1                                                                                   | Yes       | 1.917 |
| 12                                                                                                             | ALDOC        | Aldolase C, Fructose-Bisphosphate                                                              | -         | 1.857 |
| 13                                                                                                             | ACP5         | Acid Phosphatase 5, Tartrate Resistant                                                         | Yes       | 1.792 |
| 14                                                                                                             | GPX3         | Glutathione Peroxidase 3 (Plasma)                                                              | Yes       | 1.786 |
| 15                                                                                                             | MXRA5        | Matrix-Remodelling Associated 5                                                                | Yes       | 1.778 |
| 16                                                                                                             | FCGBP        | Fc Fragment Of Igg Binding Protein                                                             | Yes       | 1.770 |
| 17                                                                                                             | S100A8       | S100 Calcium Binding Protein A8 (Calgranulin A)                                                | -         | 1.762 |
| 18                                                                                                             | SFRP2        | Secreted Frizzled-Related Protein 2                                                            | Yes       | 1.740 |
| 19                                                                                                             | PLA2G7       | Phospholipase A2, Group Vii (Platelet-Activating Factor Acetylhydrolase, Plasma)               | Yes       | 1.697 |
| 20                                                                                                             | FMOD         | Fibromodulin                                                                                   | Yes       | 1.647 |
| 21                                                                                                             | A_32_P133926 | -                                                                                              | -         | 1.628 |
| 22                                                                                                             | CIDEA        | Cell Death-Inducing Dffa-Like Effector A                                                       | -         | 1.546 |
| 23                                                                                                             | SREBF1       | Sterol Regulatory Element Binding Transcription Factor 1                                       | -         | 1.545 |
| 24                                                                                                             | TK1          | Thymidine Kinase 1, Soluble                                                                    | -         | 1.517 |
| 25                                                                                                             | AACS         | Acetoacetyl-Coa Synthetase                                                                     | -         | 1.509 |
| 26                                                                                                             | FHL1         | Four And A Half Lim Domains 1                                                                  | -         | 1.484 |
| 27                                                                                                             | LIPA         | Lipase A, Lysosomal Acid, Cholesterol Esterase (Wolman Disease)                                | Yes       | 1.483 |
| 28                                                                                                             | CD52         | Cd52 Antigen (Campath-1 Antigen)                                                               | Yes       | 1.463 |
| 29                                                                                                             | IFI30        | Interferon, Gamma-Inducible Protein 30                                                         | Yes       | 1.431 |
| 30                                                                                                             | EPB41L4B     | Erythrocyte Membrane Protein Band 4.1 Like 4b                                                  | -         | 1.425 |
| 31                                                                                                             | ELOVL5       | Elovl Family Member 5, Elongation Of Long Chain Fatty Acids (Fen1/Elo2, Sur4/Elo3-Like, Yeast) | -         | 1.383 |
| 32                                                                                                             | SPOCD1       | Spoc Domain Containing 1                                                                       | -         | 1.372 |
| 33                                                                                                             | LGALS12      | Lectin, Galactoside-Binding, Soluble, 12 (Galectin 12)                                         | -         | 1.372 |
| 34                                                                                                             | AADACL1      | Arylacetamide Deacetylase-Like 1                                                               | -         | 1.352 |
| 35                                                                                                             | TNC          | Tenascin C (Hexabrachion)                                                                      | Yes       | 1.338 |

|    |              |                                                                                       |     |       |
|----|--------------|---------------------------------------------------------------------------------------|-----|-------|
| 36 | ECHDC1       | Enoyl Coenzyme A Hydratase Domain Containing 1                                        | -   | 1.333 |
| 37 | MME          | Membrane Metallo-Endopeptidase (Neutral Endopeptidase, Enkephalinase, Calla, Cd10)    | -   | 1.333 |
| 38 | PHGDH        | Phosphoglycerate Dehydrogenase                                                        | -   | 1.331 |
| 39 | EGR1         | Early Growth Response 1                                                               | -   | 1.303 |
| 40 | GDF15        | Growth Differentiation Factor 15                                                      | Yes | 1.295 |
| 41 | NMB          | Neuromedin B                                                                          | Yes | 1.290 |
| 42 | CES1         | Carboxylesterase 1 (Monocyte/Macrophage Serine Esterase 1)                            | -   | 1.288 |
| 43 | TUBB3        | Melanocortin 1 Receptor (Alpha Melanocyte Stimulating Hormone Receptor)               | -   | 1.279 |
| 44 | A_24_P212314 | -                                                                                     | -   | 1.268 |
| 45 | CCR1         | Chemokine (C-C Motif) Receptor 1                                                      | -   | 1.226 |
| 46 | ADH1A        | Alcohol Dehydrogenase 1a (Class I), Alpha Polypeptide                                 | -   | 1.226 |
| 47 | ADH1C        | Alcohol Dehydrogenase 1a (Class I), Alpha Polypeptide                                 | -   | 1.204 |
| 48 | TUBB8        | Tubulin, Beta 8                                                                       | -   | 1.204 |
| 49 | TUBB6        | Tubulin, Beta 6                                                                       | -   | 1.197 |
| 50 | C20orf7      | Chromosome 20 Open Reading Frame 7                                                    | Yes | 1.187 |
| 51 | FGR          | Gardner-Rasheed Feline Sarcoma Viral (V-Fgr) Oncogene Homolog                         | -   | 1.183 |
| 52 | ACSL1        | Fatty-Acid-Coenzyme A Ligase, Long-Chain 1                                            | -   | 1.181 |
| 53 | LOC92162     | -                                                                                     | -   | 1.180 |
| 54 | RARRES1      | Retinoic Acid Receptor Responder (Tazarotene Induced) 1                               | Yes | 1.179 |
| 55 | TUBB2        | -                                                                                     | -   | 1.154 |
| 56 | SAA4         | Serum Amyloid A4, Constitutive                                                        | Yes | 1.147 |
| 57 | SELENBP1     | Selenium Binding Protein 1                                                            | -   | 1.133 |
| 58 | DHCR24       | 24-Dehydrocholesterol Reductase                                                       | Yes | 1.119 |
| 59 | ITGB2        | Integrin, Beta 2 (Complement Component 3 Receptor 3 And 4 Subunit)                    | Yes | 1.108 |
| 60 | GPAM         | Glycerol-3-Phosphate Acyltransferase, Mitochondrial                                   | -   | 1.106 |
| 61 | ABCC6        | Atp-Binding Cassette, Sub-Family C (Cftr/Mrp), Member 6                               | -   | 1.103 |
| 62 | PDXK         | Pyridoxal (Pyridoxine, Vitamin B6) Kinase                                             | -   | 1.098 |
| 63 | SERTAD4      | Serta Domain Containing 4                                                             | -   | 1.089 |
| 64 | HMOX1        | Heme Oxygenase (Decycling) 1                                                          | -   | 1.086 |
| 65 | MMP9         | Matrix Metallopeptidase 9 (Gelatinase B, 92kda Gelatinase, 92kda Type Iv Collagenase) | Yes | 1.083 |
| 66 | TFPI2        | Tissue Factor Pathway Inhibitor 2                                                     | Yes | 1.079 |
| 67 | MARCO        | Macrophage Receptor With Collagenous Structure                                        | -   | 1.072 |
| 68 | LAMB3        | Laminin, Beta 3                                                                       | Yes | 1.055 |
| 69 | BMP6         | Bone Morphogenetic Protein 6                                                          | Yes | 1.053 |
| 70 | AQP1         | Aquaporin 1 (Colton Blood Group)                                                      | Yes | 1.049 |
| 71 | H19          | H19, Imprinted Maternally Expressed Untranslated Mrna                                 | -   | 1.049 |
| 72 | ADH1B        | Alcohol Dehydrogenase 1a (Class I), Alpha Polypeptide                                 | -   | 1.044 |
| 73 | S100B        | S100 Calcium Binding Protein, Beta (Neural)                                           | -   | 1.032 |
| 74 | BZRP         | Benzodiazapine Receptor (Peripheral)                                                  | -   | 1.024 |
| 75 | LOC152831    | -                                                                                     | -   | 1.021 |

|                                                                                                                             |           |                                                                                                                              |     |       |
|-----------------------------------------------------------------------------------------------------------------------------|-----------|------------------------------------------------------------------------------------------------------------------------------|-----|-------|
| 76                                                                                                                          | ATP1B1    | Atpase, Na+/K+ Transporting, Beta 1 Polypeptide                                                                              | -   | 1.019 |
| 77                                                                                                                          | BC018597  | -                                                                                                                            | -   | 1.015 |
| 78                                                                                                                          | THRSP     | Thyroid Hormone Responsive (Spot14 Homolog, Rat)                                                                             | -   | 1.012 |
| 79                                                                                                                          | HTRA3     | Htra Serine Peptidase 3                                                                                                      | Yes | 1.008 |
| <b>Weight Stabilization (WS) : <math>R^2x=90%</math> <math>R^2y=97%</math> <math>Q^2%=75%</math> <math>R^2%=100%</math></b> |           |                                                                                                                              |     |       |
| 1                                                                                                                           | S100A8    | S100 Calcium Binding Protein A8 (Calgranulin A)                                                                              | -   | 5.245 |
| 2                                                                                                                           | SPP1      | Secreted Phosphoprotein 1 (Osteopontin, Bone Sialoprotein I, Early T-Lymphocyte Activation 1)                                | Yes | 2.959 |
| 3                                                                                                                           | ACP5      | Acid Phosphatase 5, Tartrate Resistant                                                                                       | Yes | 2.428 |
| 4                                                                                                                           | THBS4     | Thrombospondin 4                                                                                                             | Yes | 2.349 |
| 5                                                                                                                           | HP        | Haptoglobin                                                                                                                  | Yes | 2.286 |
| 6                                                                                                                           | MMP9      | Matrix Metalloproteinase 9 (Gelatinase B, 92kda Gelatinase, 92kda Type Iv Collagenase)                                       | Yes | 2.222 |
| 7                                                                                                                           | UCHL1     | Ubiquitin Carboxyl-Terminal Esterase L1 (Ubiquitin Thiolesterase)                                                            | -   | 2.162 |
| 8                                                                                                                           | FCGBP     | Fc Fragment Of Igg Binding Protein                                                                                           | Yes | 2.142 |
| 9                                                                                                                           | CHI3L1    | Chitinase 3-Like 1 (Cartilage Glycoprotein-39)                                                                               | Yes | 2.088 |
| 10                                                                                                                          | FPR1      | Formyl Peptide Receptor 1                                                                                                    | -   | 2.076 |
| 11                                                                                                                          | PLA2G7    | Phospholipase A2, Group Vii (Platelet-Activating Factor Acetylhydrolase, Plasma)                                             | Yes | 2.029 |
| 12                                                                                                                          | CD52      | Cd52 Antigen (Campath-1 Antigen)                                                                                             | Yes | 1.935 |
| 13                                                                                                                          | IFI30     | Interferon, Gamma-Inducible Protein 30                                                                                       | Yes | 1.898 |
| 14                                                                                                                          | EGR1      | Early Growth Response 1                                                                                                      | -   | 1.754 |
| 15                                                                                                                          | SCD       | Stearoyl-Coa Desaturase (Delta-9-Desaturase)                                                                                 | -   | 1.753 |
| 16                                                                                                                          | LOC55908  | Hepatocellular Carcinoma-Associated Gene Td26                                                                                | -   | 1.736 |
| 17                                                                                                                          | FADS2     | Fatty Acid Desaturase 2                                                                                                      | -   | 1.700 |
| 18                                                                                                                          | LIPA      | Lipase A, Lysosomal Acid, Cholesterol Esterase (Wolman Disease)                                                              | Yes | 1.692 |
| 19                                                                                                                          | TNFRSF12A | Tumor Necrosis Factor Receptor Superfamily, Member 12a                                                                       | Yes | 1.597 |
| 20                                                                                                                          | HTRA3     | Htra Serine Peptidase 3                                                                                                      | Yes | 1.589 |
| 21                                                                                                                          | AADAACL1  | Arylacetamide Deacetylase-Like 1                                                                                             | -   | 1.582 |
| 22                                                                                                                          | ACSL1     | Fatty-Acid-Coenzyme A Ligase, Long-Chain 1                                                                                   | -   | 1.569 |
| 23                                                                                                                          | DGAT2     | Diacylglycerol O-Acyltransferase Homolog 2 (Mouse)                                                                           | -   | 1.514 |
| 24                                                                                                                          | WBSCR14   | Williams Beuren syndrome chromosome region 14, MLX interacting protein-like, carbohydrate-responsive element-binding protein | -   | 1.511 |
| 25                                                                                                                          | GDF15     | Growth Differentiation Factor 15                                                                                             | Yes | 1.510 |
| 26                                                                                                                          | ITGB2     | Integrin, Beta 2 (Complement Component 3 Receptor 3 And 4 Subunit)                                                           | Yes | 1.449 |
| 27                                                                                                                          | COMP      | Cartilage Oligomeric Matrix Protein                                                                                          | Yes | 1.437 |
| 28                                                                                                                          | CCR1      | Chemokine (C-C Motif) Receptor 1                                                                                             | -   | 1.399 |
| 29                                                                                                                          | MRC1L1    | Mannose Receptor, C Type 1-Like 1                                                                                            | Yes | 1.398 |
| 30                                                                                                                          | APOC1     | Apolipoprotein C-I                                                                                                           | Yes | 1.382 |
| 31                                                                                                                          | MS4A4A    | Membrane-Spanning 4-Domains, Subfamily A, Member 4                                                                           | -   | 1.377 |
| 32                                                                                                                          | CD163     | Cd163 Antigen                                                                                                                | -   | 1.349 |
| 33                                                                                                                          | SFRS5     | Splicing Factor, Arginine/Serine-Rich 5                                                                                      | -   | 1.347 |

|    |           |                                                                                                |     |       |
|----|-----------|------------------------------------------------------------------------------------------------|-----|-------|
| 34 | ZNF406    | Zinc Finger Protein 406                                                                        | -   | 1.342 |
| 35 | CTSS      | Cathepsin S                                                                                    | Yes | 1.338 |
| 36 | FBP1      | Fructose-1,6-Bisphosphatase 1                                                                  | -   | 1.337 |
| 37 | CCL13     | Chemokine (C-C Motif) Ligand 13                                                                | Yes | 1.321 |
| 38 | H19       | H19, Imprinted Maternally Expressed Untranslated Mrna                                          | -   | 1.310 |
| 39 | SLC31A2   | Solute Carrier Family 31 (Copper Transporters), Member 2                                       | Yes | 1.307 |
| 40 | RARRES1   | Retinoic Acid Receptor Responder (Tazarotene Induced) 1                                        | Yes | 1.294 |
| 41 | PHGDH     | Phosphoglycerate Dehydrogenase                                                                 | -   | 1.293 |
| 42 | ELOVL5    | Elovl Family Member 5, Elongation Of Long Chain Fatty Acids (Fen1/Elo2, Sur4/Elo3-Like, Yeast) | -   | 1.286 |
| 43 | SPOCD1    | Spoc Domain Containing 1                                                                       | -   | 1.285 |
| 44 | C20orf7   | Chromosome 20 Open Reading Frame 7                                                             | Yes | 1.273 |
| 45 | TF        | Transferrin                                                                                    | Yes | 1.270 |
| 46 | GPX3      | Glutathione Peroxidase 3 (Plasma)                                                              | Yes | 1.258 |
| 47 | TMEPAI    | Transmembrane, Prostate Androgen Induced Rna                                                   | Yes | 1.231 |
| 48 | CCL2      | Chemokine (C-C Motif) Ligand 2                                                                 | Yes | 1.225 |
| 49 | LCP1      | Lymphocyte Cytosolic Protein 1 (L-Plastin)                                                     | -   | 1.223 |
| 50 | CD68      | Cd68 Antigen                                                                                   | Yes | 1.220 |
| 51 | MIG-6     | -                                                                                              | -   | 1.218 |
| 52 | LOC387911 | Similar To Hypothetical Protein Mgc48915                                                       | -   | 1.217 |
| 53 | TK1       | Thymidine Kinase 1, Soluble                                                                    | -   | 1.186 |
| 54 | HMOX1     | Heme Oxygenase (Decycling) 1                                                                   | -   | 1.178 |
| 55 | ADPN      | Adiponutrin                                                                                    | -   | 1.172 |
| 56 | CKMT2     | Creatine Kinase, Mitochondrial 2 (Sarcomeric)                                                  | Yes | 1.164 |
| 57 | MSR1      | Macrophage Scavenger Receptor 1                                                                | -   | 1.163 |
| 58 | HCST      | Hematopoietic Cell Signal Transducer                                                           | Yes | 1.153 |
| 59 | TYROBP    | Tyro Protein Tyrosine Kinase Binding Protein                                                   | Yes | 1.151 |
| 60 | SLC25A10  | Solute Carrier Family 25 (Mitochondrial Carrier; Dicarboxylate Transporter), Member 10         | -   | 1.151 |
| 61 | S100B     | S100 Calcium Binding Protein, Beta (Neural)                                                    | -   | 1.149 |
| 62 | IGF1      | Insulin-Like Growth Factor 1 (Somatomedin C)                                                   | Yes | 1.130 |
| 63 | SLA       | Src-Like-Adaptor                                                                               | -   | 1.128 |
| 64 | EMILIN2   | Elastin Microfibril Interfacer 2                                                               | Yes | 1.127 |
| 65 | CDKN2C    | Cyclin-Dependent Kinase Inhibitor 2c (P18, Inhibits Cdk4)                                      | -   | 1.126 |
| 66 | FMOD      | Fibromodulin                                                                                   | Yes | 1.126 |
| 67 | TFPI2     | Tissue Factor Pathway Inhibitor 2                                                              | Yes | 1.124 |
| 68 | MRAP      | Melanocortin 2 Receptor Accessory Protein                                                      | -   | 1.121 |
| 69 | SOCS3     | Suppressor Of Cytokine Signaling 3                                                             | -   | 1.119 |
| 70 | TNN       | Tenascin N                                                                                     | Yes | 1.117 |
| 71 | CDKN1C    | Cyclin-Dependent Kinase Inhibitor 1c (P57, Kip2)                                               | -   | 1.116 |
| 72 | AKR1C3    | Aldo-Keto Reductase Family 1, Member C3 (3-Alpha Hydroxysteroid Dehydrogenase, Type Ii)        | -   | 1.111 |
| 73 | BQ049338  | -                                                                                              | -   | 1.107 |

|                                                                                                                       |              |                                                                                               |     |       |
|-----------------------------------------------------------------------------------------------------------------------|--------------|-----------------------------------------------------------------------------------------------|-----|-------|
| 74                                                                                                                    | HIST2H2AA    | Histone 2, H2aa                                                                               | -   | 1.096 |
| 75                                                                                                                    | C1QB         | Complement Component 1, Q Subcomponent, B Chain                                               | Yes | 1.093 |
| 76                                                                                                                    | DUSP6        | Dual Specificity Phosphatase 6                                                                | -   | 1.092 |
| 77                                                                                                                    | TUBB8        | Tubulin, Beta 8                                                                               | -   | 1.091 |
| 78                                                                                                                    | KSP37        | Ksp37 Protein                                                                                 | Yes | 1.087 |
| 79                                                                                                                    | C22orf16     | Chromosome 22 Open Reading Frame 16                                                           | -   | 1.085 |
| 80                                                                                                                    | SAA4         | Serum Amyloid A4, Constitutive                                                                | Yes | 1.073 |
| 81                                                                                                                    | ATP1B1       | Atpase, Na+/K+ Transporting, Beta 1 Polypeptide                                               | -   | 1.071 |
| 82                                                                                                                    | NMB          | Neuromedin B                                                                                  | Yes | 1.063 |
| 83                                                                                                                    | S100A10      | S100 Calcium Binding Protein A10 (Annexin Ii Ligand, Calpactin I, Light Polypeptide (P11))    | -   | 1.061 |
| 84                                                                                                                    | FHL1         | Four And A Half Lim Domains 1                                                                 | -   | 1.061 |
| 85                                                                                                                    | VSIG4        | V-Set And Immunoglobulin Domain Containing 4                                                  | Yes | 1.058 |
| 86                                                                                                                    | SREBF1       | Sterol Regulatory Element Binding Transcription Factor 1                                      | -   | 1.057 |
| 87                                                                                                                    | FUCA1        | Fucosidase, Alpha-L- 1, Tissue                                                                | Yes | 1.053 |
| 88                                                                                                                    | HSPA12A      | Heat Shock Protein 12a                                                                        | Yes | 1.052 |
| 89                                                                                                                    | PLAT         | Plasminogen Activator, Tissue                                                                 | Yes | 1.052 |
| 90                                                                                                                    | LDLR         | Low Density Lipoprotein Receptor (Familial Hypercholesterolemia)                              | Yes | 1.043 |
| 91                                                                                                                    | ANGPTL4      | Angiopoietin-Like 4                                                                           | Yes | 1.042 |
| 92                                                                                                                    | MXRA5        | Matrix-Remodelling Associated 5                                                               | Yes | 1.041 |
| 93                                                                                                                    | LILRB5       | Leukocyte Immunoglobulin-Like Receptor, Subfamily B (With Tm And Itim Domains), Member 5      | Yes | 1.036 |
| 94                                                                                                                    | SLAMF8       | Slam Family Member 8                                                                          | Yes | 1.034 |
| 95                                                                                                                    | C8orf34      | Chromosome 8 Open Reading Frame 34                                                            | -   | 1.033 |
| 96                                                                                                                    | SCN4B        | Sodium Channel, Voltage-Gated, Type Iv, Beta                                                  | Yes | 1.031 |
| 97                                                                                                                    | CAPG         | Capping Protein (Actin Filament), Gelsolin-Like                                               | -   | 1.031 |
| 98                                                                                                                    | QDPR         | Quinoid Dihydropteridine Reductase                                                            | -   | 1.029 |
| 99                                                                                                                    | ICAM3        | Intercellular Adhesion Molecule 3                                                             | Yes | 1.029 |
| 100                                                                                                                   | A_23_P170719 | -                                                                                             | Yes | 1.028 |
| 101                                                                                                                   | ADH1C        | Alcohol Dehydrogenase 1a (Class I), Alpha Polypeptide                                         | -   | 1.014 |
| 102                                                                                                                   | SLCO2B1      | Solute Carrier Organic Anion Transporter Family, Member 2b1                                   | -   | 1.007 |
| 103                                                                                                                   | PEMT         | Phosphatidylethanolamine N-Methyltransferase                                                  | -   | 1.001 |
| <b><i>Dietary Intervention (DI) : R<sup>2</sup>x=88% R<sup>2</sup>y=99% Q<sup>2</sup>%=92% R<sup>2</sup>%=97%</i></b> |              |                                                                                               |     |       |
| 1                                                                                                                     | S100A8       | S100 Calcium Binding Protein A8 (Calgranulin A)                                               | -   | 4.727 |
| 2                                                                                                                     | MMP9         | Matrix Metalloproteinase 9 (Gelatinase B, 92kda Gelatinase, 92kda Type Iv Collagenase)        | Yes | 3.414 |
| 3                                                                                                                     | SPP1         | Secreted Phosphoprotein 1 (Osteopontin, Bone Sialoprotein I, Early T-Lymphocyte Activation 1) | Yes | 3.267 |
| 4                                                                                                                     | IFI30        | Interferon, Gamma-Inducible Protein 30                                                        | Yes | 2.262 |
| 5                                                                                                                     | CD52         | Cd52 Antigen (Campath-1 Antigen)                                                              | Yes | 2.243 |
| 6                                                                                                                     | PLA2G7       | Phospholipase A2, Group Vii (Platelet-Activating Factor Acetylhydrolase, Plasma)              | Yes | 2.172 |
| 7                                                                                                                     | FPR1         | Formyl Peptide Receptor 1                                                                     | -   | 2.038 |



|    |          |                                                                                                      |     |       |
|----|----------|------------------------------------------------------------------------------------------------------|-----|-------|
| 8  | GDF15    | Growth Differentiation Factor 15                                                                     | Yes | 1.969 |
| 9  | HMOX1    | Heme Oxygenase (Decycling) 1                                                                         | -   | 1.964 |
| 10 | ACP5     | Acid Phosphatase 5, Tartrate Resistant                                                               | Yes | 1.962 |
| 11 | FCGBP    | Fc Fragment Of Igg Binding Protein                                                                   | Yes | 1.861 |
| 12 | ITGB2    | Integrin, Beta 2 (Complement Component 3 Receptor 3 And 4 Subunit)                                   | Yes | 1.850 |
| 13 | MARCO    | Macrophage Receptor With Collagenous Structure                                                       | -   | 1.845 |
| 14 | AK022045 | -                                                                                                    | -   | 1.808 |
| 15 | LIPA     | Lipase A, Lysosomal Acid, Cholesterol Esterase (Wolman Disease)                                      | Yes | 1.723 |
| 16 | AADACL1  | Arylacetamide Deacetylase-Like 1                                                                     | -   | 1.715 |
| 17 | FADS2    | Fatty Acid Desaturase 2                                                                              | -   | 1.663 |
| 18 | CHI3L1   | Chitinase 3-Like 1 (Cartilage Glycoprotein-39)                                                       | Yes | 1.636 |
| 19 | HP       | Haptoglobin                                                                                          | Yes | 1.610 |
| 20 | LOC55908 | Hepatocellular Carcinoma-Associated Gene Td26                                                        | -   | 1.604 |
| 21 | F13A1    | Coagulation Factor Xiii, A1 Polypeptide                                                              | -   | 1.582 |
| 22 | LCP1     | Lymphocyte Cytosolic Protein 1 (L-Plastin)                                                           | -   | 1.577 |
| 23 | CD163    | Cd163 Antigen                                                                                        | -   | 1.571 |
| 24 | CCR1     | Chemokine (C-C Motif) Receptor 1                                                                     | -   | 1.488 |
| 25 | FGR      | Gardner-Rasheed Feline Sarcoma Viral (V-Fgr) Oncogene Homolog                                        | -   | 1.482 |
| 26 | VSIG4    | V-Set And Immunoglobulin Domain Containing 4                                                         | Yes | 1.477 |
| 27 | ALOX5AP  | Arachidonate 5-Lipoxygenase-Activating Protein                                                       | Yes | 1.459 |
| 28 | SLC16A3  | Solute Carrier Family 16 (Monocarboxylic Acid Transporters), Member 3                                | -   | 1.444 |
| 29 | CCL13    | Chemokine (C-C Motif) Ligand 13                                                                      | Yes | 1.431 |
| 30 | C1QB     | Complement Component 1, Q Subcomponent, B Chain                                                      | Yes | 1.431 |
| 31 | CDKN1C   | Cyclin-Dependent Kinase Inhibitor 1c (P57, Kip2)                                                     | -   | 1.421 |
| 32 | MXRA5    | Matrix-Remodelling Associated 5                                                                      | Yes | 1.418 |
| 33 | NPL      | N-Acetylneuraminate Pyruvate Lyase (Dihydrodipicolinate Synthase)                                    | -   | 1.414 |
| 34 | TK1      | Thymidine Kinase 1, Soluble                                                                          | -   | 1.414 |
| 35 | HAVCR2   | Hepatitis A Virus Cellular Receptor 2                                                                | Yes | 1.376 |
| 36 | FCN1     | Ficolin (Collagen/Fibrinogen Domain Containing) 1                                                    | Yes | 1.373 |
| 37 | S100A4   | S100 Calcium Binding Protein A4 (Calcium Protein, Calvasculin, Metastasin, Murine Placental Homolog) | -   | 1.366 |
| 38 | MS4A4A   | Membrane-Spanning 4-Domains, Subfamily A, Member 4                                                   | -   | 1.365 |
| 39 | SLAMF8   | Slam Family Member 8                                                                                 | Yes | 1.359 |
| 40 | DHRS9    | Dehydrogenase/Reductase (Sdr Family) Member 9                                                        | Yes | 1.345 |
| 41 | BCAT1    | Branched Chain Aminotransferase 1, Cytosolic                                                         | -   | 1.345 |
| 42 | CD14     | Cd14 Antigen                                                                                         | Yes | 1.340 |
| 43 | SCD      | Stearoyl-Coa Desaturase (Delta-9-Desaturase)                                                         | -   | 1.334 |
| 44 | MSR1     | Macrophage Scavenger Receptor 1                                                                      | -   | 1.334 |
| 45 | AK022044 | -                                                                                                    | -   | 1.333 |
| 46 | EMILIN2  | Elastin Microfibril Interfacer 2                                                                     | Yes | 1.326 |
| 47 | CD68     | Cd68 Antigen                                                                                         | Yes | 1.325 |

|    |            |                                                                                                                              |     |       |
|----|------------|------------------------------------------------------------------------------------------------------------------------------|-----|-------|
| 48 | ATF3       | Activating Transcription Factor 3                                                                                            | -   | 1.316 |
| 49 | CTSS       | Cathepsin S                                                                                                                  | Yes | 1.316 |
| 50 | SFRP4      | Secreted Frizzled-Related Protein 4                                                                                          | Yes | 1.297 |
| 51 | FADS1      | Fatty Acid Desaturase 1                                                                                                      | -   | 1.290 |
| 52 | ZBTB20     | Zinc Finger And Btb Domain Containing 20                                                                                     | -   | 1.289 |
| 53 | MS4A7      | Membrane-Spanning 4-Domains, Subfamily A, Member 7                                                                           | -   | 1.288 |
| 54 | IL4I1      | Interleukin 4 Induced 1                                                                                                      | Yes | 1.287 |
| 55 | C1QA       | Complement Component 1, Q Subcomponent, A Chain                                                                              | Yes | 1.286 |
| 56 | KIAA0485   | Kiaa0485 Protein                                                                                                             | -   | 1.285 |
| 57 | TYROBP     | Tyro Protein Tyrosine Kinase Binding Protein                                                                                 | Yes | 1.274 |
| 58 | UCHL1      | Ubiquitin Carboxyl-Terminal Esterase L1 (Ubiquitin Thiolesterase)                                                            | -   | 1.272 |
| 59 | IGSF21     | Immunoglobulin Superfamily, Member 21                                                                                        | Yes | 1.272 |
| 60 | CES1       | Carboxylesterase 1 (Monocyte/Macrophage Serine Esterase 1)                                                                   | -   | 1.271 |
| 61 | LAPTM5     | Lysosomal Associated Multispanning Membrane Protein 5                                                                        | -   | 1.235 |
| 62 | CKMT2      | Creatine Kinase, Mitochondrial 2 (Sarcomeric)                                                                                | Yes | 1.226 |
| 63 | THC2389705 | -                                                                                                                            | -   | 1.222 |
| 64 | AIF1       | Allograft Inflammatory Factor 1                                                                                              | -   | 1.222 |
| 65 | APOC1      | Apolipoprotein C-I                                                                                                           | Yes | 1.215 |
| 66 | ITGAX      | Integrin, Alpha X (Complement Component 3 Receptor 4 Subunit)                                                                | Yes | 1.213 |
| 67 | LOC440234  | -                                                                                                                            | -   | 1.203 |
| 68 | SLA        | Src-Like-Adaptor                                                                                                             | -   | 1.199 |
| 69 | WBSCR14    | Williams Beuren syndrome chromosome region 14, MLX interacting protein-like, carbohydrate-responsive element-binding protein | -   | 1.195 |
| 70 | CTSB       | Cathepsin B                                                                                                                  | Yes | 1.194 |
| 71 | C1orf38    | Chromosome 1 Open Reading Frame 38                                                                                           | -   | 1.190 |
| 72 | SPOCD1     | Spoc Domain Containing 1                                                                                                     | -   | 1.186 |
| 73 | ADH1B      | Alcohol Dehydrogenase 1a (Class I), Alpha Polypeptide                                                                        | -   | 1.181 |
| 74 | CSF1R      | Colony Stimulating Factor 1 Receptor, Formerly Mcdonough Feline Sarcoma Viral (V-Fms) Oncogene Homolog                       | Yes | 1.179 |
| 75 | HCST       | Hematopoietic Cell Signal Transducer                                                                                         | Yes | 1.178 |
| 76 | LYZ        | Lysozyme (Renal Amyloidosis)                                                                                                 | Yes | 1.173 |
| 77 | SLCO2B1    | Solute Carrier Organic Anion Transporter Family, Member 2b1                                                                  | -   | 1.172 |
| 78 | TFRC       | Transferrin Receptor (P90, Cd71)                                                                                             | -   | 1.161 |
| 79 | RGS10      | Regulator Of G-Protein Signalling 10                                                                                         | -   | 1.159 |
| 80 | ATP1B1     | Atpase, Na+/K+ Transporting, Beta 1 Polypeptide                                                                              | -   | 1.159 |
| 81 | RAC2       | Ras-Related C3 Botulinum Toxin Substrate 2 (Rho Family, Small Gtp Binding Protein Rac2)                                      | -   | 1.150 |
| 82 | C19orf28   | Hypothetical Protein Pp3501                                                                                                  | -   | 1.150 |
| 83 | CXCR4      | Chemokine (C-X-C Motif) Receptor 4                                                                                           | -   | 1.144 |
| 84 | KYNU       | Kynureninase (L-Kynurenine Hydrolase)                                                                                        | -   | 1.144 |
| 85 | ADH1C      | Alcohol Dehydrogenase 1a (Class I), Alpha Polypeptide                                                                        | -   | 1.142 |
| 86 | VAMP8      | Vesicle-Associated Membrane Protein 8 (Endobrevin)                                                                           | -   | 1.138 |
| 87 | FCGR2B     | Fc Fragment Of Igg, Low Affinity Iib, Receptor (Cd32)                                                                        | Yes | 1.124 |

|     |                  |                                                                                          |     |       |
|-----|------------------|------------------------------------------------------------------------------------------|-----|-------|
| 88  | WDFY4            | Wdfy Family Member 4                                                                     | -   | 1.122 |
| 89  | URP2             | Unc-112 Related Protein 2                                                                | -   | 1.120 |
| 90  | CIRBP            | Cold Inducible Rna Binding Protein                                                       | -   | 1.120 |
| 91  | FBP1             | Fructose-1,6-Bisphosphatase 1                                                            | -   | 1.110 |
| 92  | CCL2             | Chemokine (C-C Motif) Ligand 2                                                           | Yes | 1.108 |
| 93  | SLC31A2          | Solute Carrier Family 31 (Copper Transporters), Member 2                                 | Yes | 1.105 |
| 94  | BQ049338         | -                                                                                        | -   | 1.093 |
| 95  | TIGA1            | Tiga1                                                                                    | -   | 1.092 |
| 96  | TNC              | Tenascin C (Hexabrachion)                                                                | Yes | 1.091 |
| 97  | LILRB5           | Leukocyte Immunoglobulin-Like Receptor, Subfamily B (With Tm And Itim Domains), Member 5 | Yes | 1.091 |
| 98  | ADH1A            | Alcohol Dehydrogenase 1a (Class I), Alpha Polypeptide                                    | -   | 1.081 |
| 99  | BC016022         | -                                                                                        | -   | 1.077 |
| 100 | MRC1L1           | Mannose Receptor, C Type 1-Like 1                                                        | Yes | 1.077 |
| 101 | A_24_P835388     | -                                                                                        | Yes | 1.074 |
| 102 | ASAHI            | N-Acylsphingosine Amidohydrolase (Acid Ceramidase) 1                                     | Yes | 1.065 |
| 103 | CD53             | Cd53 Antigen                                                                             | Yes | 1.060 |
| 104 | FOLR2            | Folate Receptor 2 (Fetal)                                                                | Yes | 1.058 |
| 105 | TUBB6            | Tubulin, Beta 6                                                                          | -   | 1.058 |
| 106 | CYBB             | Cytochrome B-245, Beta Polypeptide (Chronic Granulomatous Disease)                       | Yes | 1.047 |
| 107 | ARPC1B           | Actin Related Protein 2/3 Complex, Subunit 1b, 41kda                                     | -   | 1.046 |
| 108 | TGFBI            | Transforming Growth Factor, Beta-Induced, 68kda                                          | Yes | 1.043 |
| 109 | ENST000002627-95 | -                                                                                        | -   | 1.030 |
| 110 | GLUL             | Glutamate-Ammonia Ligase (Glutamine Synthetase)                                          | -   | 1.024 |
| 111 | XLKD1            | Extracellular Link Domain Containing 1                                                   | Yes | 1.019 |
| 112 | CD83             | Cd83 Antigen (Activated B Lymphocytes, Immunoglobulin Superfamily)                       | Yes | 1.012 |
| 113 | C1QG             | -                                                                                        | Yes | 1.011 |
| 114 | SFRS5            | Splicing Factor, Arginine/Serine-Rich 5                                                  | -   | 1.011 |

The PLS-R method has been developed for constructing predictive models which maximizes the covariance between the predictor space (gene expression, X) and the response space (insulin sensitivity, Y). A principal component analysis of the set of X variables is carried out in order to predict the Y variable. The optimal number of component is determined by cross validation and a normalized total error of prediction (cross-validation parameter  $Q^2$ ) is computed.  $Q^2$  serves as a predictive measure for the full model and is used to select optimal number of PLS-R components. Other statistics are calculated from the model. The importance of variation in X matrix and Y variables is explained by the factors  $R^2X$  and  $R^2Y$  respectively (fraction of the sums of squares of X and Y values). The variable importance for projection (VIP) represents the value of each predictor in fitting the PLS-R model for both predictors and response. A value above 1 is considered to high.  $R^2$  is the correlation coefficient between Y and each PLS-R component of the PLS-R model.

**Supplementary Table A6:** List of differentially expressed genes related to metabolism during energy restriction

| Gene symbol | Gene name                                                                                            | Pathway                                 | Cell specificity |
|-------------|------------------------------------------------------------------------------------------------------|-----------------------------------------|------------------|
| ACADM       | Acyl-Coenzyme A dehydrogenase, C-4 to C-12 straight chain                                            | Mitochondrial fatty acid beta-oxidation | Adipocyte        |
| ACO2        | Aconitase 2, mitochondrial                                                                           | Citrate cycle (TCA cycle)               | Adipocyte        |
| ACOX1       | Acyl-Coenzyme A oxidase 1, palmitoyl                                                                 | Mitochondrial fatty acid beta-oxidation | Adipocyte        |
| ACSL1       | Acyl-CoA synthetase long-chain family member 1                                                       | Mitochondrial fatty acid beta-oxidation | Adipocyte        |
| ACSL3       | Acyl-CoA synthetase long-chain family member 3                                                       | Mitochondrial fatty acid beta-oxidation | Adipocyte        |
| ACYP2       | Acylphosphatase 2, muscle type                                                                       | Glycolysis                              | Adipocyte        |
| ADPN        | adiponutrin (PNPLA3)                                                                                 | Triacylglycerol synthesis               | Adipocyte        |
| AGPAT3      | 1-acylglycerol-3-phosphate O-acyltransferase 3                                                       | Triacylglycerol synthesis               | Adipocyte        |
| ALDOC       | Aldolase C, fructose-bisphosphate                                                                    | Glycolysis                              | Adipocyte        |
| ATP5A1      | ATP synthase, H <sup>+</sup> transporting, mitochondrial F1 complex, alpha subunit 1, cardiac muscle | Oxidative phosphorylation               | Adipocyte        |
| ATP5B       | ATP synthase, H <sup>+</sup> transporting, mitochondrial F1 complex, beta polypeptide                | Oxidative phosphorylation               | Adipocyte        |
| ATP5C1      | ATP synthase, H <sup>+</sup> transporting, mitochondrial F1 complex, gamma polypeptide 1             | Oxidative phosphorylation               | Adipocyte        |
| ATP5F1      | ATP synthase, H <sup>+</sup> transporting, mitochondrial F0 complex, subunit B1                      | Oxidative phosphorylation               | -                |
| ATP5J       | ATP synthase, H <sup>+</sup> transporting, mitochondrial F0 complex, subunit F6                      | Oxidative phosphorylation               | Adipocyte        |
| ATP5J2      | ATP synthase, H <sup>+</sup> transporting, mitochondrial F0 complex, subunit F2                      | Oxidative phosphorylation               | -                |
| ATP6V1D     | ATPase, H <sup>+</sup> transporting, lysosomal 34kDa, V1 subunit D                                   | Oxidative phosphorylation               | Adipocyte        |
| ATPAF1      | ATP synthase mitochondrial F1 complex assembly factor 1                                              | Oxidative phosphorylation               | -                |
| CLYBL       | Citrate lyase beta like                                                                              | Fatty acid synthesis                    | -                |
| COX4I1      | Cytochrome c oxidase subunit IV isoform 1                                                            | Oxidative phosphorylation               | -                |
| COX5A       | Cytochrome c oxidase subunit Va                                                                      | Oxidative phosphorylation               | Adipocyte        |
| COX5B       | Cytochrome c oxidase subunit Vb                                                                      | Oxidative phosphorylation               | Adipocyte        |
| COX6B1      | Cytochrome c oxidase subunit Vib polypeptide 1 (ubiquitous)                                          | Oxidative phosphorylation               | -                |
| COX7A1      | Cytochrome c oxidase subunit VIIa polypeptide 1 (muscle)                                             | Oxidative phosphorylation               | Adipocyte        |
| COX7A2      | Cytochrome c oxidase subunit VIIa polypeptide 2 (liver)                                              | Oxidative phosphorylation               | -                |
| COX7B       | Cytochrome c oxidase subunit VIIb                                                                    | Oxidative phosphorylation               | -                |
| COX7C       | Cytochrome c oxidase subunit VIIc                                                                    | Oxidative phosphorylation               | Adipocyte        |
| COX8A       | Cytochrome c oxidase subunit 8A (ubiquitous)                                                         | Oxidative phosphorylation               | Adipocyte        |
| CYCS        | Cytochrome c somatic                                                                                 | Oxidative phosphorylation               | -                |

|         |                                                                                   |                                                 |           |
|---------|-----------------------------------------------------------------------------------|-------------------------------------------------|-----------|
| DGAT1   | Diacylglycerol O-acyltransferase homolog 1 (mouse)                                | Triacylglycerol synthesis                       | Adipocyte |
| DGAT2   | Diacylglycerol O-acyltransferase homolog 2 (mouse)                                | Triacylglycerol synthesis                       | Adipocyte |
| DLAT    | Dihydrolipoamide S-acetyltransferase                                              | Pyruvate metabolism                             | Adipocyte |
| DLD     | Dihydrolipoamide dehydrogenase                                                    | Pyruvate metabolism - Citrate cycle (TCA cycle) | Adipocyte |
| ECHS1   | Enoyl Coenzyme A hydratase, short chain, 1, mitochondrial                         | Mitochondrial fatty acid beta-oxidation         | Adipocyte |
| FADS1   | Fatty acid desaturase 1                                                           | Fatty acid synthesis                            | Adipocyte |
| FADS2   | Fatty acid desaturase 2                                                           | Fatty acid synthesis                            | Adipocyte |
| FH      | Fumarate hydratase                                                                | Citrate cycle (TCA cycle)                       | Adipocyte |
| GAPDH   | glyceraldehyde-3-phosphate dehydrogenase                                          | Glycolysis                                      | -         |
| GPI     | Glucose phosphate isomerase                                                       | Glycolysis                                      | Adipocyte |
| IDH1    | Isocitrate dehydrogenase 1 (NADP+), soluble                                       | Citrate cycle (TCA cycle)                       | Adipocyte |
| IDH2    | Isocitrate dehydrogenase 2 (NADP+), mitochondrial                                 | Citrate cycle (TCA cycle)                       | -         |
| LDHA    | Lactate dehydrogenase A                                                           | Pyruvate metabolism                             | Adipocyte |
| LDHD    | Lactate dehydrogenase D                                                           | Pyruvate metabolism                             | Adipocyte |
| ME1     | Malic enzyme 1, NADP(+)-dependent, cytosolic                                      | Fatty acid synthesis                            | Adipocyte |
| MECR    | Mitochondrial trans-2-enoyl-CoA reductase                                         | Mitochondrial fatty acid beta-oxidation         | Adipocyte |
| NDUFA1  | NADH dehydrogenase (ubiquinone) 1 alpha subcomplex, 1, 7.5kDa                     | Oxidative phosphorylation                       | -         |
| NDUFA11 | NADH dehydrogenase (ubiquinone) 1 alpha subcomplex, 11, 14.7kDa                   | Oxidative phosphorylation                       | -         |
| NDUFA2  | NADH dehydrogenase (ubiquinone) 1 alpha subcomplex, 2, 8kDa                       | Oxidative phosphorylation                       | Adipocyte |
| NDUFA6  | NADH dehydrogenase (ubiquinone) 1 alpha subcomplex, 6, 14kDa                      | Oxidative phosphorylation                       | Adipocyte |
| NDUFAB1 | NADH dehydrogenase (ubiquinone) 1, alpha/beta subcomplex, 1, 8kDa                 | Oxidative phosphorylation                       | Adipocyte |
| NDUFB2  | NADH dehydrogenase (ubiquinone) 1 beta subcomplex, 2, 8kDa                        | Oxidative phosphorylation                       | Adipocyte |
| NDUFB3  | NADH dehydrogenase (ubiquinone) 1 beta subcomplex, 3, 12kDa                       | Oxidative phosphorylation                       | Adipocyte |
| NDUFB5  | NADH dehydrogenase (ubiquinone) 1 beta subcomplex, 5, 16kDa                       | Oxidative phosphorylation                       | Adipocyte |
| NDUFB7  | NADH dehydrogenase (ubiquinone) 1 beta subcomplex, 7, 18kDa                       | Oxidative phosphorylation                       | Adipocyte |
| NDUFS1  | NADH dehydrogenase (ubiquinone) Fe-S protein 1, 75kDa (NADH-coenzyme Q reductase) | Oxidative phosphorylation                       | Adipocyte |
| NDUFS2  | NADH dehydrogenase (ubiquinone) Fe-S protein 2, 49kDa (NADH-coenzyme Q reductase) | Oxidative phosphorylation                       | Adipocyte |

|         |                                                                                             |                           |           |
|---------|---------------------------------------------------------------------------------------------|---------------------------|-----------|
| NDUFS3  | NADH dehydrogenase (ubiquinone) Fe-S protein 3, 30kDa (NADH-coenzyme Q reductase)           | Oxidative phosphorylation | Adipocyte |
| NDUFS6  | NADH dehydrogenase (ubiquinone) Fe-S protein 6, 13kDa (NADH-coenzyme Q reductase)           | Oxidative phosphorylation | Adipocyte |
| NDUFS7  | NADH dehydrogenase (ubiquinone) Fe-S protein 7, 20kDa (NADH-coenzyme Q reductase)           | Oxidative phosphorylation | Adipocyte |
| NDUFV1  | NADH dehydrogenase (ubiquinone) flavoprotein 1, 51kDa                                       | Oxidative phosphorylation | Adipocyte |
| NDUFV2  | NADH dehydrogenase (ubiquinone) flavoprotein 2, 24kDa                                       | Oxidative phosphorylation | Adipocyte |
| PC      | Pyruvate carboxylase                                                                        | Pyruvate metabolism       | Adipocyte |
| PDHA1   | Pyruvate dehydrogenase (lipoamide) alpha 1                                                  | Pyruvate metabolism       | Adipocyte |
| PDHX    | Pyruvate dehydrogenase complex, component X                                                 | Pyruvate metabolism       | Adipocyte |
| PFKFB1  | 6-phosphofructo-2-kinase/fructose-2,6-biphosphatase 1                                       | Glycolysis                | Adipocyte |
| PGAM1   | Phosphoglycerate mutase 1 (brain)                                                           | Glycolysis                | -         |
| PGK1    | Phosphoglycerate kinase 1                                                                   | Glycolysis                | -         |
| PGM1    | Phosphoglucomutase 1                                                                        | Glycogenolysis            | Adipocyte |
| PPAP2A  | Phosphatidic acid phosphatase type 2A                                                       | Triacylglycerol synthesis | Adipocyte |
| QP-C    | UQCRQ ubiquinol-cytochrome c reductase, complex III subunit VII, 9.5kDa                     | Oxidative phosphorylation | -         |
| SCD     | Stearoyl-CoA desaturase (delta-9-desaturase)                                                | Fatty acid synthesis      | Adipocyte |
| SDHA    | Succinate dehydrogenase complex, subunit A, flavoprotein (Fp)                               | Citrate cycle (TCA cycle) | Adipocyte |
| SDHD    | Succinate dehydrogenase complex, subunit D, integral membrane protein                       | Citrate cycle (TCA cycle) | Adipocyte |
| SLC25A1 | Solute carrier family 25 (mitochondrial carrier; citrate transporter), member 1             | Fatty acid synthesis      | Adipocyte |
| SLC25A4 | Solute carrier family 25 (mitochondrial carrier; adenine nucleotide translocator), member 4 | Oxidative phosphorylation | Adipocyte |
| SLC25A5 | Solute carrier family 25 (mitochondrial carrier; adenine nucleotide translocator), member 5 | Oxidative phosphorylation | -         |
| SUCLG1  | Succinate-CoA ligase, alpha subunit                                                         | Citrate cycle (TCA cycle) | Adipocyte |
| UCRC    | Ubiquinol-cytochrome c reductase complex (7.2 kD)                                           | Oxidative phosphorylation | Adipocyte |
| UQCR    | Ubiquinol-cytochrome c reductase, 6.4kDa subunit                                            | Oxidative phosphorylation | Adipocyte |
| UQCRC1  | Ubiquinol-cytochrome c reductase core protein I                                             | Oxidative phosphorylation | -         |
| UQCRC2  | Ubiquinol-cytochrome c reductase core protein II                                            | Oxidative phosphorylation | Adipocyte |
| UQCRFS1 | Ubiquinol-cytochrome c reductase, Rieske iron-sulfur polypeptide 1                          | Oxidative phosphorylation | Adipocyte |
| UQCRH   | Ubiquinol-cytochrome c reductase hinge protein                                              | Oxidative phosphorylation | Adipocyte |

**Supplementary Table A7:** List of differentially expressed genes related to macrophage activity during dietary intervention.

| Gene symbol | Gene name                                              | Pathway                           | Cell specificity |
|-------------|--------------------------------------------------------|-----------------------------------|------------------|
| ACTB        | Actin, beta                                            | Cytoskeleton signaling            | -                |
| ACTC        | actin, alpha, cardiac muscle 1                         | Cytoskeleton signaling            | -                |
| ACTG1       | Actin, gamma 1                                         | Cytoskeleton signaling            | -                |
| ACTR3       | ARP3 actin-related protein 3 homolog (yeast)           | Cytoskeleton signaling            | -                |
| ARPC1B      | Actin related protein 2/3 complex, subunit 1B, 41kDa   | Cytoskeleton signaling            | -                |
| ARPC2       | Actin related protein 2/3 complex, subunit 2, 34kDa    | Cytoskeleton signaling            | -                |
| C1QA        | Complement component 1, q subcomponent, A chain        | Complement activation             | Macrophage       |
| C1QB        | Complement component 1, q subcomponent, B chain        | Complement activation             | Macrophage       |
| C1QC        | Complement component 1, q subcomponent, C chain        | Complement activation             | Macrophage       |
| CCL13       | Chemokine (C-C motif) ligand 13                        | Cell chemotaxis and adhesion      | Macrophage       |
| CCL2        | Chemokine (C-C motif) ligand 2                         | Cell chemotaxis and adhesion      | -                |
| CCR1        | Chemokine (C-C motif) receptor 1                       | Cell chemotaxis and adhesion      | -                |
| CCR5        | Chemokine (C-C motif) receptor 5                       | Cell chemotaxis and adhesion      | Macrophage       |
| CD14        | CD14 molecule                                          | NFkB activation                   | Macrophage       |
| CD163       | CD163 molecule                                         | Macrophage activation             | Macrophage       |
| CD209       | CD209 molecule                                         | Antimicrobial defense             | Macrophage       |
| CD33        | CD33 molecule                                          | Cell chemotaxis and adhesion      | Macrophage       |
| CD53        | CD53 molecule                                          | Antimicrobial defense             | -                |
| CD68        | CD68 molecule                                          | Acute phase response              | Macrophage       |
| CD97        | CD97 molecule                                          | Cell chemotaxis and adhesion      | -                |
| CSF1R       | Colony stimulating factor 1 receptor                   | Macrophage activation             | Macrophage       |
| CTSA        | Cathepsin A                                            | Extra cellular matrix remodelling | -                |
| CTSB        | Cathepsin B                                            | Extra cellular matrix remodelling | Macrophage       |
| CTSC        | Cathepsin C                                            | Extra cellular matrix remodelling | Macrophage       |
| CTSS        | Cathepsin S                                            | Extra cellular matrix remodelling | -                |
| CTSZ        | Cathepsin Z                                            | Extra cellular matrix remodelling | -                |
| CXCL9       | Chemokine (C-X-C motif) ligand 9                       | Cell chemotaxis and adhesion      | -                |
| FCGR2B      | Fc fragment of IgG, low affinity IIb, receptor (CD32)  | Antigen presentation              | Macrophage       |
| FN1         | Fibronectin 1                                          | Extra cellular matrix remodelling | -                |
| HLA-DMA     | Major histocompatibility complex, class II, DM alpha   | Antigen presentation              | Macrophage       |
| HLA-DMB     | Major histocompatibility complex, class II, DM beta    | Antigen presentation              | Macrophage       |
| HLA-DPA1    | Major histocompatibility complex, class II, DP alpha 1 | Antigen presentation              | -                |
| HLA-DPB1    | Major histocompatibility complex, class II, DP beta 1  | Antigen presentation              | -                |
| HLA-DQA2    | major histocompatibility complex, class II, DQ alpha 2 | Antigen presentation              | -                |
| HLA-DQB1    | Major histocompatibility complex, class II, DQ beta 1  | Antigen presentation              | -                |
| IL10Ra      | Interleukin 10 receptor, alpha                         | Interleukin signaling             | -                |
| IL10RB      | Interleukin 10 receptor, beta                          | Interleukin signaling             | -                |

|        |                                                                                               |                                   |            |
|--------|-----------------------------------------------------------------------------------------------|-----------------------------------|------------|
| IL1R1  | Interleukin 1 receptor, type I                                                                | Interleukin signaling             | -          |
| IQGAP2 | IQ motif containing GTPase activating protein 2                                               | Cytoskeleton signaling            | -          |
| IRAK1  | Interleukin-1 receptor-associated kinase 1                                                    | NFkB activation                   | -          |
| ITGAM  | Integrin, alpha M (complement component 3 receptor 3 subunit)                                 | Cell chemotaxis and adhesion      | -          |
| ITGAV  | Integrin, alpha V (vitronectin receptor, alpha polypeptide, antigen CD51)                     | Cell chemotaxis and adhesion      | -          |
| LOX    | Lysyl oxidase                                                                                 | Extra cellular matrix remodelling | -          |
| LOXL2  | Lysyl oxidase-like 2                                                                          | Extra cellular matrix remodelling | -          |
| MARCO  | Macrophage receptor with collagenous structure                                                | Antimicrobial defense             | Macrophage |
| MMP19  | Matrix metalloproteinase 19                                                                   | Extra cellular matrix remodelling | -          |
| MMP9   | Matrix metalloproteinase 9 (gelatinase B, 92kDa gelatinase, 92kDa type IV collagenase)        | Extra cellular matrix remodelling | -          |
| MRC1L1 | Mannose receptor, C type 1-like 1                                                             | Antimicrobial defense             | Macrophage |
| MSR1   | Macrophage scavenger receptor 1                                                               | Antimicrobial defense             | Macrophage |
| MyD88  | Myeloid differentiation primary response gene (88)                                            | NFkB activation                   | -          |
| NFKBIE | Nuclear factor of kappa light polypeptide gene enhancer in B-cells inhibitor, epsilon         | NFkB activation                   | -          |
| PLAU   | Plasminogen activator, urokinase                                                              | Extra cellular matrix remodelling | -          |
| RAC2   | Ras-related C3 botulinum toxin substrate 2 (rho family, small GTP binding protein Rac2)       | Cytoskeleton signaling            | -          |
| SPP1   | Secreted phosphoprotein 1 (osteopontin, bone sialoprotein I, early T-lymphocyte activation 1) | Cell chemotaxis and adhesion      | Macrophage |
| STAT3  | Signal transducer and activator of transcription 3 (acute-phase response factor)              | signal transduction               | -          |
| TGFBI  | Transforming growth factor, beta-induced, 68kDa                                               | Extra cellular matrix remodelling | Macrophage |
| TLR4   | Toll-like receptor 4                                                                          | NFkB activation                   | -          |
| XLKD1  | Lymphatic vessel endothelial hyaluronan receptor 1 (LYVE-1)                                   | Cell chemotaxis and adhesion      | -          |
